# Supplementary material for: Ruthenium(ii)-catalyzed synthesis of CF3-isoquinolinones via C–H activation/annulation of benzoic acids and CF3-imidoyl sulfoxonium ylides
Source: Royal Society of Chemistry journal article supplement (doi:10.1039/d2qo00839d), 2022-01-01

# **Ruthenium(II)-catalyzed synthesis of CF<sub>3</sub>-isoquinolinones *via* C–H activation/annulation of benzoic acids and CF<sub>3</sub>-imidoyl sulfoxonium ylides**

Si Wen, Yuqing Zhang, Qingyu Tian, Yanhui Chen, and Guolin Cheng\*

Xiamen Key Laboratory of Optoelectronic Materials and Advanced Manufacturing, College of Materials Science and Engineering, the Instrumental Analysis Center, Huaqiao University, Xiamen 361021, China

\*Corresponding Author E-mail: glcheng@hqu.edu.cn

## **Table of Contents**

|                                                         |     |
|---------------------------------------------------------|-----|
| <b>1. General Information</b>                           | S2  |
| <b>2. Experimental Section</b>                          | S3  |
| <b>2.1 Optimization of the Reaction Conditions</b>      | S3  |
| <b>2.2 Procedure for the Synthesis of 2</b>             | S6  |
| <b>2.3 Procedure for the Synthesis of 3</b>             | S6  |
| <b>2.4 Procedure for the Synthesis of 4</b>             | S15 |
| <b>2.5 Procedure for the Gram-Scale Synthesis of 3a</b> | S21 |
| <b>2.6 Procedure for the Synthesis of D-1a</b>          | S21 |
| <b>2.7 Procedure for the Synthesis of D-3a</b>          | S22 |
| <b>2.8 Kinetic Isotope Effect Experiment</b>            | S22 |
| <b>2.9 Synthetic Applications of 3a</b>                 | S23 |
| <b>3. <sup>1</sup>H and <sup>13</sup>C NMR Spectra</b>  | S28 |

## 1. General Information

All the solvents were used without further purification. The other commercial chemicals were used without further purification. All reactions were performed under an air of nitrogen in flame-dried glassware, unless otherwise stated. Analytical thin layer chromatography was performed on 0.25 mm silica gel 60-F254. Visualization was carried out with UV light and Vogel's permanganate. Preparative TLC was performed on 1.0 mm silica gel.  $^1\text{H}$  NMR spectra were recorded on a Bruker Avance III instrument (500 MHz).  $^{13}\text{C}$  NMR spectra were recorded on a Bruker Avance III instrument (126 MHz) and were fully decoupled by broad band proton decoupling. High-resolution mass spectra (HRMS) were recorded on an Agilent 1290 mass spectrometer using ESI-TOF (electrospray ionization time-of-flight). IR spectra were recorded on a Nicolet IS 50. IR spectra were recorded in KBr. NMR spectra were recorded in  $\text{CDCl}_3$ .  $^1\text{H}$  NMR spectra were referenced to residual  $\text{CHCl}_3$  at 7.26 ppm, and  $^{13}\text{C}$  NMR spectra were referenced to the central peak of  $\text{CDCl}_3$  at 77.0 ppm. Chemical shifts ( $\delta$ ) are reported in ppm, and coupling constants ( $J$ ) are in Hertz (Hz). Multiplicities are reported using the following abbreviations: s = singlet, d = doublet, t = triplet, q = quartet, m = multiplet.

## 2. Experimental Section

### 2.1 Optimization of the Reaction Conditions

Table S1 Optimization of the Reaction Conditions<sup>a</sup>

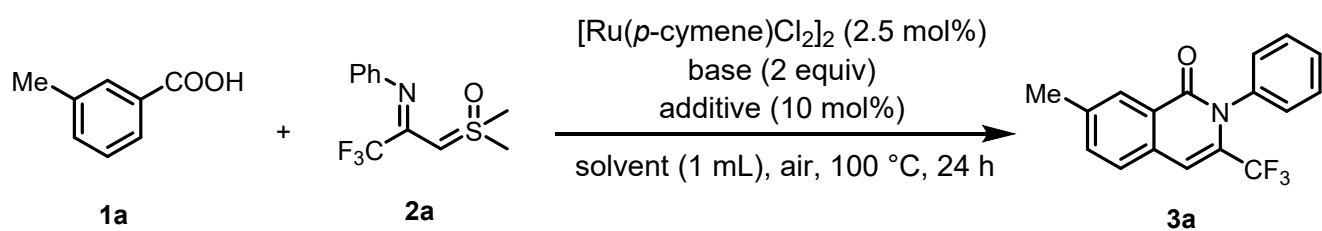

| Entry     | Solvent                 | Base                            | Additive                 | Yield (%) <sup>b</sup>     |
|-----------|-------------------------|---------------------------------|--------------------------|----------------------------|
| 1         | DCE                     | NEt <sub>3</sub>                | AgSbF <sub>6</sub>       | 72                         |
| 2         | DMF                     | NEt <sub>3</sub>                | AgSbF <sub>6</sub>       | 20                         |
| 3         | MTBE                    | NEt <sub>3</sub>                | AgSbF <sub>6</sub>       | 26                         |
| 4         | HFIP                    | NEt <sub>3</sub>                | AgSbF <sub>6</sub>       | trace                      |
| 5         | toluene                 | NEt <sub>3</sub>                | AgSbF <sub>6</sub>       | 34                         |
| 6         | <i>i</i> PrOH           | NEt <sub>3</sub>                | AgSbF <sub>6</sub>       | 10                         |
| 7         | NMP                     | NEt <sub>3</sub>                | AgSbF <sub>6</sub>       | 0                          |
| 8         | DMSO                    | NEt <sub>3</sub>                | AgSbF <sub>6</sub>       | 0                          |
| 9         | THF                     | NEt <sub>3</sub>                | AgSbF <sub>6</sub>       | 25                         |
| 10        | 1,4-dioxane             | NEt <sub>3</sub>                | AgSbF <sub>6</sub>       | 10                         |
| <b>11</b> | <b>CH<sub>3</sub>CN</b> | <b>NEt<sub>3</sub></b>          | <b>AgSbF<sub>6</sub></b> | <b>76 (73)<sup>c</sup></b> |
| 12        | CH <sub>3</sub> CN      | K <sub>2</sub> CO <sub>3</sub>  | AgSbF <sub>6</sub>       | 35                         |
| 13        | CH <sub>3</sub> CN      | KOAc                            | AgSbF <sub>6</sub>       | 40                         |
| 14        | CH <sub>3</sub> CN      | KHCO <sub>3</sub>               | AgSbF <sub>6</sub>       | 50                         |
| 15        | CH <sub>3</sub> CN      | KOH                             | AgSbF <sub>6</sub>       | 45                         |
| 16        | CH <sub>3</sub> CN      | K <sub>2</sub> HPO <sub>4</sub> | AgSbF <sub>6</sub>       | 45                         |
| 17        | CH <sub>3</sub> CN      | K <sub>3</sub> PO <sub>4</sub>  | AgSbF <sub>6</sub>       | 25                         |
| 18        | CH <sub>3</sub> CN      | KH <sub>2</sub> PO <sub>4</sub> | AgSbF <sub>6</sub>       | 40                         |
| 19        | CH <sub>3</sub> CN      | NaOH                            | AgSbF <sub>6</sub>       | 0                          |
| 20        | CH <sub>3</sub> CN      | NaOAc                           | AgSbF <sub>6</sub>       | 57                         |
| 21        | CH <sub>3</sub> CN      | HCOONa                          | AgSbF <sub>6</sub>       | 25                         |
| 22        | CH <sub>3</sub> CN      | CH <sub>3</sub> ONa             | AgSbF <sub>6</sub>       | 35                         |
| 23        | CH <sub>3</sub> CN      | NaHCO <sub>3</sub>              | AgSbF <sub>6</sub>       | 54                         |

---

|                 |                    |                                  |                    |    |
|-----------------|--------------------|----------------------------------|--------------------|----|
| 24              | CH <sub>3</sub> CN | Na <sub>2</sub> CO <sub>3</sub>  | AgSbF <sub>6</sub> | 35 |
| 25              | CH <sub>3</sub> CN | Na <sub>3</sub> PO <sub>4</sub>  | AgSbF <sub>6</sub> | 62 |
| 26              | CH <sub>3</sub> CN | NaH <sub>2</sub> PO <sub>4</sub> | AgSbF <sub>6</sub> | 45 |
| 27              | CH <sub>3</sub> CN | <sup>t</sup> BuOK                | AgSbF <sub>6</sub> | 20 |
| 28              | CH <sub>3</sub> CN | <sup>t</sup> BuONa               | AgSbF <sub>6</sub> | 10 |
| 27              | CH <sub>3</sub> CN | Cs <sub>2</sub> CO <sub>3</sub>  | AgSbF <sub>6</sub> | 34 |
| 28              | CH <sub>3</sub> CN | LiOH                             | AgSbF <sub>6</sub> | 20 |
| 29              | CH <sub>3</sub> CN | CH <sub>3</sub> OK               | AgSbF <sub>6</sub> | 20 |
| 30              | CH <sub>3</sub> CN | Li <sub>2</sub> CO <sub>3</sub>  | AgSbF <sub>6</sub> | 45 |
| 31              | CH <sub>3</sub> CN | LiOAc                            | AgSbF <sub>6</sub> | 45 |
| 32              | CH <sub>3</sub> CN | <sup>t</sup> BuOLi               | AgSbF <sub>6</sub> | 0  |
| 33              | CH <sub>3</sub> CN | DBU                              | AgSbF <sub>6</sub> | 30 |
| 34              | CH <sub>3</sub> CN | Cy <sub>2</sub> NH               | AgSbF <sub>6</sub> | 48 |
| 35              | CH <sub>3</sub> CN | <sup>i</sup> Pr <sub>2</sub> NEt | AgSbF <sub>6</sub> | 47 |
| 36              | CH <sub>3</sub> CN | NEt <sub>3</sub>                 | ---                | 45 |
| 37              | CH <sub>3</sub> CN | ---                              | AgSbF <sub>6</sub> | 48 |
| 48              | CH <sub>3</sub> CN | ---                              | ---                | 46 |
| 39 <sup>d</sup> | CH <sub>3</sub> CN | NEt <sub>3</sub>                 | AgSbF <sub>6</sub> | 65 |
| 40 <sup>e</sup> | CH <sub>3</sub> CN | NEt <sub>3</sub>                 | AgSbF <sub>6</sub> | 74 |
| 41 <sup>f</sup> | CH <sub>3</sub> CN | NEt <sub>3</sub>                 | AgSbF <sub>6</sub> | 44 |
| 42 <sup>g</sup> | CH <sub>3</sub> CN | NEt <sub>3</sub>                 | AgSbF <sub>6</sub> | 0  |
| 43 <sup>h</sup> | CH <sub>3</sub> CN | NEt <sub>3</sub>                 | AgSbF <sub>6</sub> | 58 |
| 44 <sup>i</sup> | CH <sub>3</sub> CN | NEt <sub>3</sub>                 | AgSbF <sub>6</sub> | 66 |
| 45 <sup>j</sup> | CH <sub>3</sub> CN | NEt <sub>3</sub>                 | AgSbF <sub>6</sub> | 50 |

---

|                 |                    |                  |                                 |       |
|-----------------|--------------------|------------------|---------------------------------|-------|
| 46 <sup>k</sup> | CH <sub>3</sub> CN | NEt <sub>3</sub> | AgSbF <sub>6</sub>              | 72    |
| 47 <sup>l</sup> | CH <sub>3</sub> CN | NEt <sub>3</sub> | AgSbF <sub>6</sub>              | trace |
| 48              | CH <sub>3</sub> CN | NEt <sub>3</sub> | AgOAc                           | 64    |
| 49              | CH <sub>3</sub> CN | NEt <sub>3</sub> | Ag <sub>2</sub> CO <sub>3</sub> | 48    |
| 50              | CH <sub>3</sub> CN | NEt <sub>3</sub> | CF <sub>3</sub> COAg            | 54    |
| 51              | CH <sub>3</sub> CN | NEt <sub>3</sub> | AgNO <sub>3</sub>               | 38    |
| 52              | CH <sub>3</sub> CN | NEt <sub>3</sub> | AgOTf                           | 34    |

<sup>a</sup> **1a** (0.1 mmol), **2a** (0.15 mmol), base (2.0 equiv), additive (10 mol%) and solvent (1 mL) at 100 °C under air for 24 h. <sup>b</sup> The yields were determined by <sup>1</sup>H NMR analysis of the crude product using CH<sub>2</sub>Br<sub>2</sub> as the internal standard. <sup>c</sup> The isolated yield. <sup>d</sup> At 80 °C. <sup>e</sup> At 120 °C. <sup>f</sup> At 60 °C. <sup>g</sup> At 40 °C. <sup>h</sup> **1a** (0.1 mmol), **2a** (0.2 mmol). <sup>i</sup> **1a** (0.15 mmol), **2a** (0.1 mmol). <sup>j</sup> CH<sub>3</sub>CN 0.5 mL. <sup>k</sup> CH<sub>3</sub>CN 2 mL. <sup>l</sup> Without [Ru(*p*-cymene)Cl<sub>2</sub>]<sub>2</sub>.

## 2.2 Procedure for the Synthesis of 2

All compounds **2** are known, which were synthesized following the literature procedures.<sup>1</sup> To a solution of triphenylphosphine (82 mmol, 3 equiv) in CCl<sub>4</sub> (100 mL), triethylamine (32.2 mmol, 1.2 equiv) and fluorinated carboxylic acid (27.4 mmol, 1 equiv) were added dropwise at 0 °C. After stirring for 10 min at 0 °C, the aniline (27.4 mmol, 1 equiv) was added. The mixture was refluxed on an oil bath for 4 h and then cooled at room temperature, and then filtered under reduced pressure. The filtrate was concentrated under vacuum, and the resulting residue was purified by flash chromatography on silica gel with petroleum ether. Then, Trimethylsulfoxonium iodide (30 mmol, 3.0 equiv) was suspended in THF (150 mL) in a 250 mL round bottom flask, <sup>t</sup>BuOK (30 mmol, 3.0 equiv) was added and the mixture was stirred at room temperature for 2 hours. After, fluorinated acetimidoyl chloride (10 mmol, 1.0 equiv) was added. The mixture was stirred at room temperature for 3 hours and then filtered through a plug of celite before all volatiles were removed under vacuum. Purification by flash chromatography (DCM/MeOH = 100 : 1) afforded products.

## 2.3 Procedure for the Synthesis of 3

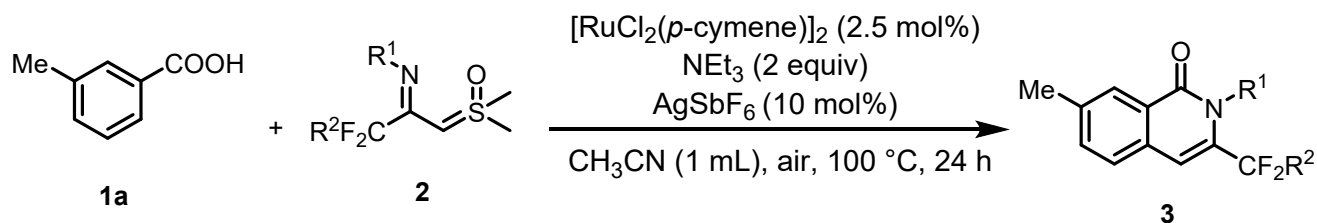

A dried 10 mL Schlenk tube was charged with **3-methylbenzoic acid 1a** (13.6 mg, 0.1 mmol, 1 equiv), **sulfoxonium ylide 2** (0.15 mmol, 1.5 equiv), [Ru(*p*-cymene)Cl<sub>2</sub>]<sub>2</sub> (1.6 mg, 2.5 mol%), NEt<sub>3</sub> (20.2 mg, 0.2 mmol, 2.0 equiv), AgSbF<sub>6</sub> (3.4 mg, 20 mol%) and CH<sub>3</sub>CN (1 mL). The reaction mixture was heated to 100 °C on a heating plate for 24 hours under vigorous stirring. Upon completion, the reaction mixture was cooled to room temperature, diluted with ethyl acetate, and filtered through a pad of celite. The filtrate was concentrated under vacuum, and the resulting residue was purified by preparative thin layer chromatography (PTLC) with ethyl acetate : hexane to give the corresponding products.

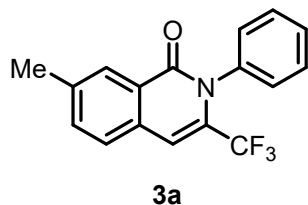

**7-methyl-2-phenyl-3-(trifluoromethyl)isoquinolin-1(2H)-one (3a)** (22.2 mg, 73%) was prepared from typical procedure (ethyl acetate: hexane = 1 : 10) as yellow solid. <sup>1</sup>H NMR (500 MHz, Chloroform-*d*) δ 8.23 (s, 1H), 7.58 (d, *J* = 1.9 Hz, 2H), 7.50 (dd, *J* = 6.9, 4.6 Hz, 3H), 7.30 (d, *J* = 6.9 Hz, 2H), 7.10 (s, 1H), 2.53 (s, 3H); <sup>13</sup>C NMR (126 MHz, Chloroform-*d*) δ 162.7, 140.1, 137.2, 134.7, 131.8, 129.8 (q, *J* =

32.6 Hz), 129.5, 129.2, 129.0, 128.2, 127.4, 127.1, 120.2 (q,  $J = 273.0$  Hz), 107.7 (q,  $J = 6.1$  Hz), 21.7; HRMS (ESI-TOF)  $m/z$ : calcd for  $C_{17}H_{13}F_3NO^+$ : 304.0944 ( $M + H$ )<sup>+</sup>, found: 304.0947. m.p. 143-144 °C. IR (KBr):  $\nu = 3093, 3066, 3043, 2926, 1660, 1501, 1490, 1315, 886$   $cm^{-1}$ .

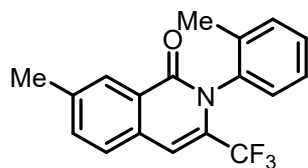

**3b**

**7-methyl-2-(o-tolyl)-3-(trifluoromethyl)isoquinolin-1(2H)-one (3b)** (19.7 mg, 62%) was prepared from typical procedure (ethyl acetate: hexane = 1 : 10) as Light grey solid. <sup>1</sup>H NMR (500 MHz, Chloroform-*d*)  $\delta$  8.26 (s, 1H), 7.59 (s, 2H), 7.41 – 7.37 (m, 1H), 7.35 (d,  $J = 6.9$  Hz, 1H), 7.32 (t,  $J = 7.5$  Hz, 1H), 7.21 (d,  $J = 7.8$  Hz, 1H), 7.14 (s, 1H), 2.53 (s, 3H), 2.09 (s, 3H); <sup>13</sup>C NMR (126 MHz, Chloroform-*d*)  $\delta$  161.9, 140.0, 137.2, 136.2, 134.7, 131.9, 130.6, 129.5 (q,  $J = 32.4$  Hz), 129.45, 129.39, 128.2, 127.4, 127.0, 126.5, 120.1 (q,  $J = 273.0$  Hz), 108.0 (q,  $J = 6.1$  Hz), 21.7, 17.4; HRMS (ESI-TOF)  $m/z$ : calcd for  $C_{18}H_{15}F_3NO^+$ : 318.1100 ( $M + H$ )<sup>+</sup>, found: 318.1096. m.p. 134-135 °C. IR (KBr):  $\nu = 3093, 3033, 2941, 2925, 1658, 1503, 1492, 1315, 890$   $cm^{-1}$ .

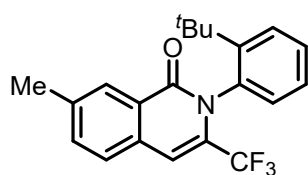

**3c**

**2-(2-(tert-butyl)phenyl)-7-methyl-3-(trifluoromethyl)isoquinolin-1(2H)-one (3c)** (13.3 mg, 37%) was prepared from typical procedure (ethyl acetate: hexane = 1 : 10) as yellow solid. <sup>1</sup>H NMR (500 MHz, Chloroform-*d*)  $\delta$  8.26 (s, 1H), 7.63 (d,  $J = 8.2$  Hz, 1H), 7.58 (s, 2H), 7.43 (t,  $J = 7.2$  Hz, 1H), 7.30 – 7.23 (m, 1H), 7.13 (s, 1H), 7.03 (d,  $J = 7.8$  Hz, 1H), 2.53 (s, 3H), 1.22 (s, 9H); <sup>13</sup>C NMR (126 MHz, Chloroform-*d*)  $\delta$  163.4, 147.8, 140.1, 134.7, 133.8, 131.8, 131.5, 130.4 (q,  $J = 31.7$  Hz), 130.1, 129.3, 128.3, 127.4, 126.9, 126.3, 120.2 (q,  $J = 273.3$  Hz), 107.8 (q,  $J = 6.2$  Hz), 36.7, 31.7, 21.6; HRMS (ESI-TOF)  $m/z$ : calcd for  $C_{21}H_{21}F_3NO^+$ : 360.1570 ( $M + H$ )<sup>+</sup>, found: 360.1573. m.p. 155-157 °C. IR (KBr):  $\nu = 3090, 2995, 2962, 2919, 2878, 1659, 1501, 1491, 1313, 891$   $cm^{-1}$ .

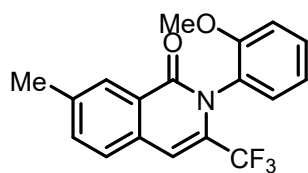

**3d**

**2-(2-methoxyphenyl)-7-methyl-3-(trifluoromethyl)isoquinolin-1(2H)-one (3d)** (15.8 mg, 47%) was prepared from typical procedure (ethyl acetate: hexane = 1 : 6) as white solid. <sup>1</sup>H NMR (500 MHz, Chloroform-*d*) δ 8.25 (s, 1H), 7.57 (s, 2H), 7.46 (t, *J* = 7.5 Hz, 1H), 7.25 (d, *J* = 5.6 Hz, 1H), 7.09 (s, 1H), 7.09 – 7.05 (m, 1H), 7.04 (d, *J* = 8.4 Hz, 1H), 3.75 (s, 3H), 2.52 (s, 3H); <sup>13</sup>C NMR (126 MHz, Chloroform-*d*) δ 162.3, 155.9, 139.7, 134.5, 132.0, 130.8, 130.6, 130.1 (q, *J* = 32.6 Hz), 128.2, 127.3, 127.0, 125.9, 120.4, 120.1 (q, *J* = 272.9 Hz), 111.6, 107.6 (q, *J* = 5.9 Hz), 55.7, 21.7; HRMS (ESI-TOF) *m/z*: calcd for C<sub>18</sub>H<sub>14</sub>F<sub>3</sub>NO<sub>2</sub>K<sup>+</sup>: 372.0608 (M + K)<sup>+</sup>, found: 372.0609. m.p. 112-113 °C. IR (KBr): ν = 3097, 2923, 1671, 1500, 1460, 1315, 1025, 872 cm<sup>-1</sup>.

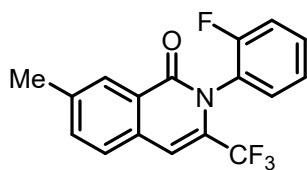

**3e**

**2-(2-fluorophenyl)-7-methyl-3-(trifluoromethyl)isoquinolin-1(2H)-one (3e)** (18.8 mg, 59%) was prepared from typical procedure (ethyl acetate: hexane = 1 : 10) as white solid. <sup>1</sup>H NMR (500 MHz, Chloroform-*d*) δ 8.24 (s, 1H), 7.61 – 7.56 (m, 2H), 7.52 – 7.47 (m, 1H), 7.34 (t, *J* = 7.5 Hz, 1H), 7.28 (td, *J* = 7.1, 6.4, 1.4 Hz, 1H), 7.28 – 7.21 (m, 1H), 7.12 (s, 1H), 2.53 (s, 3H); <sup>13</sup>C NMR (126 MHz, Chloroform-*d*) δ 162.1, 158.9 (d, *J* = 252.0 Hz), 140.2, 134.9, 131.8, 131.4, 131.3, 129.4 (q, *J* = 33.0 Hz), 128.3, 127.5, 126.7, 124.9 (d, *J* = 14.0 Hz), 124.3 (d, *J* = 3.9 Hz), 120.1 (q, *J* = 272.7 Hz), 116.3 (d, *J* = 19.9 Hz), 108.2 (q, *J* = 6.0 Hz), 21.7; HRMS (ESI-TOF) *m/z*: calcd for C<sub>17</sub>H<sub>12</sub>F<sub>4</sub>NO<sup>+</sup>: 322.0850 (M + H)<sup>+</sup>, found: 322.0846. m.p. 136-137 °C. IR (KBr): ν = 3094, 2927, 1664, 1500, 1316, 1133, 889, 817 cm<sup>-1</sup>.

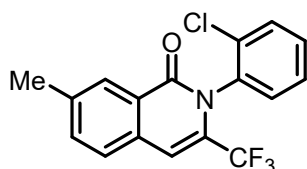

**3f**

**2-(2-chlorophenyl)-7-methyl-3-(trifluoromethyl)isoquinolin-1(2H)-one (3f)** (21.3 mg, 63%) was prepared from typical procedure (ethyl acetate: hexane = 1 : 10) as light yellow solid. <sup>1</sup>H NMR (500 MHz, Chloroform-*d*) δ 8.26 (s, 1H), 7.60 (d, *J* = 10.8 Hz, 2H), 7.58 – 7.55 (m, 1H), 7.49 – 7.44 (m, 1H), 7.44 – 7.40 (m, 1H), 7.39 (d, *J* = 7.5 Hz, 1H), 7.14 (s, 1H), 2.53 (s, 3H); <sup>13</sup>C NMR (126 MHz, Chloroform-*d*) δ 161.8, 140.2, 134.9, 134.2, 131.8, 131.23, 131.22, 130.7, 130.0, 129.1 (q, *J* = 33.0 Hz), 128.3, 127.6, 127.4, 126.8, 120.0 (q, *J* = 272.8 Hz), 108.2 (q, *J* = 6.0 Hz), 21.7; HRMS (ESI-TOF) *m/z*: calcd for C<sub>17</sub>H<sub>12</sub>ClF<sub>3</sub>NO<sup>+</sup>: 338.0554 (M + H)<sup>+</sup>, found: 338.0553. m.p. 123-125 °C. IR (KBr): ν = 3100, 2923, 1670, 1504, 1475, 1314, 884, 736 cm<sup>-1</sup>.



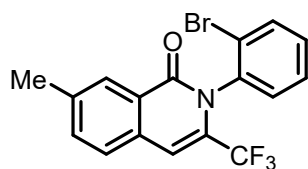

**3g**

**2-(2-bromophenyl)-7-methyl-3-(trifluoromethyl)isoquinolin-1(2H)-one (3g)** (18 mg, 47%) was prepared from typical procedure (ethyl acetate: hexane = 1 : 10) as yellow solid. <sup>1</sup>H NMR (500 MHz, Chloroform-*d*) δ 8.27 (s, 1H), 7.74 (d, *J* = 7.9 Hz, 1H), 7.60 (s, 2H), 7.47 (t, *J* = 7.5 Hz, 1H), 7.40 (d, *J* = 7.9 Hz, 1H), 7.37 (t, *J* = 7.9 Hz, 1H), 7.15 (s, 1H), 2.53 (s, 3H); <sup>13</sup>C NMR (126 MHz, Chloroform-*d*) δ 161.8, 140.2, 136.6, 134.9, 133.2, 131.8, 131.3, 130.8, 129.0 (q, *J* = 33.2 Hz), 128.3, 128.1, 127.6, 126.9, 124.6, 120.0 (q, *J* = 273.3 Hz), 108.3 (q, *J* = 6.0 Hz), 21.7; HRMS (ESI-TOF) *m/z*: calcd for C<sub>17</sub>H<sub>12</sub>BrF<sub>3</sub>NO<sup>+</sup>: 382.0049 (M + H)<sup>+</sup>, found: 382.0052. m.p. 140-142 °C. IR (KBr): ν = 3092, 2926, 1668, 1503, 1472, 1314, 861, 651 cm<sup>-1</sup>.

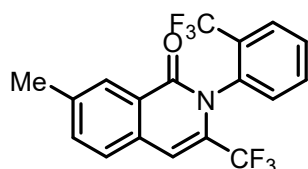

**3h**

**7-methyl-3-(trifluoromethyl)-2-(2-(trifluoromethyl)phenyl)isoquinolin-1(2H)-one (3h)** (18.7 mg, 50%) was prepared from typical procedure (ethyl acetate: hexane = 1 : 10) as yellow solid. <sup>1</sup>H NMR (500 MHz, Chloroform-*d*) δ 8.23 (s, 1H), 7.82 (d, *J* = 7.8 Hz, 1H), 7.71 (t, *J* = 7.6 Hz, 1H), 7.64 (t, *J* = 7.7 Hz, 1H), 7.63 – 7.55 (m, 2H), 7.42 (d, *J* = 7.9 Hz, 1H), 7.12 (s, 1H), 2.52 (s, 3H); <sup>13</sup>C NMR (126 MHz, Chloroform-*d*) δ 162.5, 140.3, 134.9, 134.7, 132.6, 132.0, 131.7, 129.9, 129.5 (q, *J* = 20.4 Hz), 129.3 (q, *J* = 18.6 Hz), 128.3, 127.7 (q, *J* = 4.7 Hz), 127.6, 126.6, 123.0 (q, *J* = 273.4 Hz), 120.0 (q, *J* = 272.9 Hz), 108.3 (q, *J* = 6.1 Hz), 21.6; HRMS (ESI-TOF) *m/z*: calcd for C<sub>18</sub>H<sub>12</sub>F<sub>6</sub>NO<sup>+</sup>: 372.0818 (M + H)<sup>+</sup>, found: 372.0816. m.p. 132-133 °C. IR (KBr): ν = 3062, 2918, 1679, 1607, 1497, 1455, 1315, 857 cm<sup>-1</sup>.

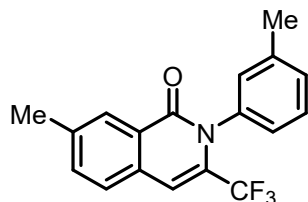

**3i**

**7-methyl-2-(*m*-tolyl)-3-(trifluoromethyl)isoquinolin-1(2H)-one (3i)** (18.2 mg, 57%) was prepared from typical procedure (ethyl acetate: hexane = 1 : 10) as white solid. <sup>1</sup>H NMR (500 MHz, Chloroform-*d*) δ 8.23 (s, 1H), 7.57 (s, 2H), 7.39 (t, *J* = 7.6 Hz, 1H), 7.29 (d, *J* = 7.7 Hz, 1H), 7.10 (d, *J* = 3.3 Hz, 3H), 2.53 (s, 3H), 2.41 (s, 3H); <sup>13</sup>C NMR (126 MHz, Chloroform-*d*) δ 162.8, 140.0, 138.9, 137.0, 134.7, 131.8, 130.0, 130.0, 129.7 (q, *J* = 32.7 Hz), 128.7, 128.1, 127.4, 127.0, 126.4, 120.2 (q, *J* = 273.1 Hz), 107.6 (q,

$J = 6.0$  Hz), 21.7, 21.3; HRMS (ESI-TOF)  $m/z$ : calcd for  $C_{18}H_{15}F_3NO^+$ : 318.1100 ( $M + H$ )<sup>+</sup>, found: 318.1102. m.p. 117-118 °C. IR (KBr):  $\nu = 3095, 3034, 2922, 2865, 1660, 1502, 1488, 1316, 890$   $cm^{-1}$ .

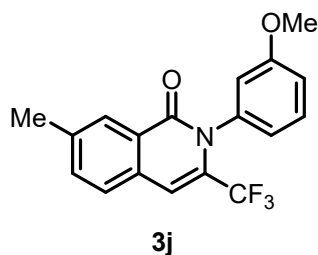

**2-(3-methoxyphenyl)-7-methyl-3-(trifluoromethyl)isoquinolin-1(2H)-one (3j)** (21.3 mg, 64%) was prepared from typical procedure (ethyl acetate: hexane = 1 : 6) as yellow solid. <sup>1</sup>H NMR (500 MHz, Chloroform-*d*)  $\delta$  8.24 (s, 1H), 7.60 – 7.55 (m, 2H), 7.40 (t,  $J = 8.1$  Hz, 1H), 7.10 (s, 1H), 7.03 (dd,  $J = 8.4, 1.9$  Hz, 1H), 6.89 (d,  $J = 7.8$  Hz, 1H), 6.84 (s, 1H), 3.82 (s, 3H), 2.53 (s, 3H); <sup>13</sup>C NMR (126 MHz, Chloroform-*d*)  $\delta$  162.6, 160.0, 140.1, 138.1, 134.7, 131.8, 130.0 (q,  $J = 32.7$  Hz), 129.6, 128.2, 127.4, 127.0, 121.8, 120.2 (q,  $J = 273.1$  Hz), 115.2, 115.2, 107.7 (q,  $J = 6.1$  Hz), 55.4, 21.6; HRMS (ESI-TOF)  $m/z$ : calcd for  $C_{18}H_{15}F_3NO_2^+$ : 334.1049 ( $M + H$ )<sup>+</sup>, found: 334.1046. m.p. 85-86 °C. IR (KBr):  $\nu = 3074, 3006, 2968, 2924, 1664, 1605, 1496, 1313, 1032, 856$   $cm^{-1}$ .

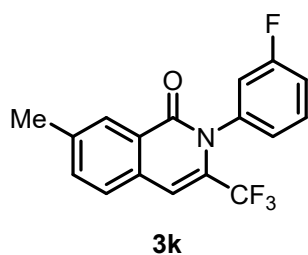

**2-(3-fluorophenyl)-7-methyl-3-(trifluoromethyl)isoquinolin-1(2H)-one (3k)** (17.1 mg, 53%) was prepared from typical procedure (ethyl acetate: hexane = 1 : 10) as light yellow solid. <sup>1</sup>H NMR (500 MHz, Chloroform-*d*)  $\delta$  8.23 (s, 1H), 7.63 – 7.55 (m, 2H), 7.52 – 7.43 (m, 1H), 7.24 – 7.19 (m, 1H), 7.10 (d,  $J = 6.9$  Hz, 2H), 7.06 (d,  $J = 9.0$  Hz, 1H), 2.53 (s, 3H); <sup>13</sup>C NMR (126 MHz, Chloroform-*d*)  $\delta$  162.6 (d,  $J = 248.0$  Hz), 162.5, 140.3, 138.4 (d,  $J = 10.0$  Hz), 134.9, 131.7, 130.1 (d,  $J = 8.8$  Hz), 129.4 (q,  $J = 32.8$  Hz), 128.2, 127.5, 126.9, 125.5, 120.1 (q,  $J = 273.0$  Hz), 117.4 (d,  $J = 23.2$  Hz), 116.5 (d,  $J = 21.0$  Hz), 108.0 (q,  $J = 6.0$  Hz), 21.7; HRMS (ESI-TOF)  $m/z$ : calcd for  $C_{17}H_{12}F_4NO^+$ : 322.0850 ( $M + H$ )<sup>+</sup>, found: 322.0854. m.p. 113-114 °C. IR (KBr):  $\nu = 3094, 3036, 2924, 1672, 1600, 1503, 1488, 1315, 1131, 871$   $cm^{-1}$ .

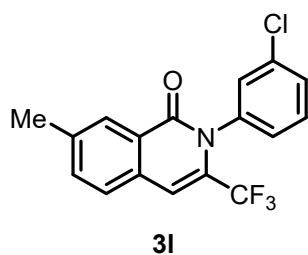

**2-(3-chlorophenyl)-7-methyl-3-(trifluoromethyl)isoquinolin-1(2H)-one (3l)** (13.4 mg, 40%) was prepared from typical procedure (ethyl acetate: hexane = 1 : 10) as white solid. <sup>1</sup>H NMR (500 MHz, Chloroform-*d*) δ 8.22 (s, 1H), 7.64 – 7.59 (m, 1H), 7.58 (d, *J* = 8.1 Hz, 1H), 7.49 (dt, *J* = 8.2, 1.6 Hz, 1H), 7.45 (t, *J* = 7.9 Hz, 1H), 7.33 (s, 1H), 7.21 (d, *J* = 7.6 Hz, 1H), 7.12 (s, 1H), 2.54 (s, 3H); <sup>13</sup>C NMR (126 MHz, Chloroform-*d*) δ 162.5, 140.4, 138.1, 134.9, 134.5, 131.7, 130.0, 129.9, 129.6, 129.3 (q, *J* = 32.6 Hz), 128.1, 128.0, 127.5, 126.8, 120.1 (q, *J* = 273.0 Hz), 108.0 (q, *J* = 6.0 Hz), 21.7; HRMS (ESI-TOF) *m/z*: calcd for C<sub>17</sub>H<sub>12</sub>ClF<sub>3</sub>NO<sup>+</sup>: 338.0554 (M + H)<sup>+</sup>, found: 338.0555. m.p. 150-151 °C. IR (KBr): ν = 3087, 3061, 2922, 1674, 1583, 1504, 1474, 1315, 861, 741 cm<sup>-1</sup>.

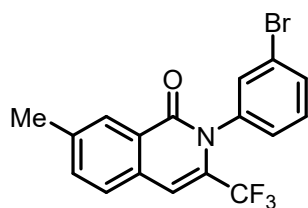

**3m**

**2-(3-bromophenyl)-7-methyl-3-(trifluoromethyl)isoquinolin-1(2H)-one (3m)** (26.7 mg, 70%) was prepared from typical procedure (ethyl acetate: hexane = 1 : 10) as brown solid. <sup>1</sup>H NMR (500 MHz, Chloroform-*d*) δ 8.22 (s, 1H), 7.63 (d, *J* = 8.1 Hz, 1H), 7.63 – 7.54 (m, 2H), 7.47 (s, 1H), 7.38 (t, *J* = 8.0 Hz, 1H), 7.28 – 7.24 (m, 1H), 7.11 (s, 1H), 2.53 (s, 3H); <sup>13</sup>C NMR (126 MHz, Chloroform-*d*) δ 162.5, 140.4, 138.3, 134.9, 132.8, 132.5, 131.7, 130.2, 129.3 (q, *J* = 32.9 Hz), 128.4, 128.2, 127.5, 126.8, 122.2, 120.1 (q, *J* = 273.0 Hz), 108.0 (q, *J* = 6.1 Hz), 21.7; HRMS (ESI-TOF) *m/z*: calcd for C<sub>17</sub>H<sub>12</sub>BrF<sub>3</sub>NO<sup>+</sup>: 382.0049 (M + H)<sup>+</sup>, found: 382.0054. m.p. 144-146 °C. IR (KBr): ν = 3088, 3060, 2943, 1675, 1506, 1471, 1316, 862, 687 cm<sup>-1</sup>.

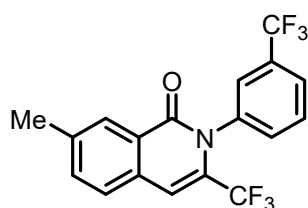

**3n**

**7-methyl-3-(trifluoromethyl)-2-(3-(trifluoromethyl)phenyl)isoquinolin-1(2H)-one (3n)** (27.9 mg, 75%) was prepared from typical procedure (ethyl acetate: hexane = 1 : 10) as yellow solid. <sup>1</sup>H NMR (500 MHz, Chloroform-*d*) δ 8.22 (s, 1H), 7.76 (d, *J* = 7.9 Hz, 1H), 7.65 (t, *J* = 7.9 Hz, 1H), 7.61 (dd, *J* = 8.0, 1.4 Hz, 1H), 7.59 (d, *J* = 4.4 Hz, 2H), 7.51 (d, *J* = 8.0 Hz, 1H), 7.13 (s, 1H), 2.53 (s, 3H); <sup>13</sup>C NMR (126 MHz, Chloroform-*d*) δ 162.6, 140.5, 137.7, 135.0, 133.2, 131.7 (q, *J* = 33.2 Hz), 131.7, 129.6, 129.2 (q, *J* = 32.8 Hz), 128.2, 127.6, 126.9 (q, *J* = 4.1 Hz), 126.8, 126.2 (q, *J* = 3.6 Hz), 123.5 (q, *J* = 272.5 Hz), 120.1 (q, *J* = 272.9 Hz), 108.2 (q, *J* = 6.0 Hz), 21.7; HRMS (ESI-TOF) *m/z*: calcd for C<sub>18</sub>H<sub>11</sub>F<sub>6</sub>NOK<sup>+</sup>: 410.0376 (M + K)<sup>+</sup>, found: 410.0374. m.p. 128-130 °C. IR (KBr): ν = 3095, 3038, 2925, 1660, 1503, 1492, 1317, 891 cm<sup>-1</sup>.

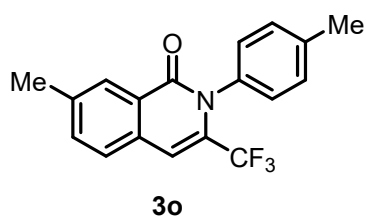

**7-methyl-2-(*p*-tolyl)-3-(trifluoromethyl)isoquinolin-1(2*H*)-one (3o)** (18.4 mg, 58%) was prepared from typical procedure (ethyl acetate: hexane = 1 : 10) as yellow solid. <sup>1</sup>H NMR (500 MHz, Chloroform-*d*) δ 8.23 (s, 1H), 7.57 (s, 2H), 7.30 (d, *J* = 7.9 Hz, 2H), 7.17 (d, *J* = 7.9 Hz, 2H), 7.09 (s, 1H), 2.52 (s, 3H), 2.43 (s, 3H); <sup>13</sup>C NMR (126 MHz, Chloroform-*d*) δ 162.8, 140.0, 139.1, 134.6, 134.4, 131.8, 129.7, 129.2 (q, *J* = 47.5 Hz), 129.1, 128.1, 127.4, 127.0, 120.2 (q, *J* = 272.8 Hz), 107.6 (q, *J* = 6.1 Hz), 21.7, 21.3; HRMS (ESI-TOF) *m/z*: calcd for C<sub>18</sub>H<sub>15</sub>F<sub>3</sub>NO<sup>+</sup>: 318.1100 (M + H)<sup>+</sup>, found: 318.1099. m.p. 169-171 °C. IR (KBr): ν = 3095, 3064, 3039, 2950, 2923, 1659, 1510, 1316, 890 cm<sup>-1</sup>.

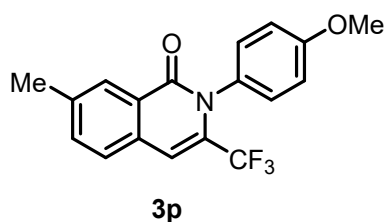

**2-(4-methoxyphenyl)-7-methyl-3-(trifluoromethyl)isoquinolin-1(2*H*)-one (3p)** (14.4 mg, 43%) was prepared from typical procedure (ethyl acetate: hexane = 1 : 6) as white solid. <sup>1</sup>H NMR (500 MHz, Chloroform-*d*) δ 8.23 (s, 1H), 7.61 – 7.53 (m, 2H), 7.20 (d, *J* = 8.5 Hz, 2H), 7.09 (s, 1H), 7.00 (d, *J* = 8.9 Hz, 2H), 3.87 (s, 3H), 2.52 (s, 3H); <sup>13</sup>C NMR (126 MHz, Chloroform-*d*) δ 163.0, 159.9, 140.0, 134.6, 131.8, 130.5, 130.0 (q, *J* = 32.3 Hz), 129.6, 128.2, 127.4, 127.0, 120.3 (q, *J* = 272.9 Hz), 114.2, 107.6 (q, *J* = 6.1 Hz), 55.4, 21.7; HRMS (ESI-TOF) *m/z*: calcd for C<sub>18</sub>H<sub>15</sub>F<sub>3</sub>NO<sub>2</sub><sup>+</sup>: 334.1049 (M + H)<sup>+</sup>, found: 334.1050. m.p. 188-189 °C. IR (KBr): ν = 3094, 3007, 2960, 2937, 1659, 1510, 1315, 1035, 896 cm<sup>-1</sup>.

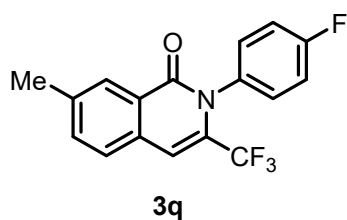

**2-(4-fluorophenyl)-7-methyl-3-(trifluoromethyl)isoquinolin-1(2*H*)-one (3q)** (21 mg, 65%) was prepared from typical procedure (ethyl acetate: hexane = 1 : 10) as pale solid. <sup>1</sup>H NMR (500 MHz, Chloroform-*d*) δ 8.22 (s, 1H), 7.62 – 7.56 (m, 2H), 7.28 (dd, *J* = 8.9, 5.0 Hz, 2H), 7.19 (t, *J* = 8.5 Hz, 2H), 7.11 (s, 1H), 2.53 (s, 3H); <sup>13</sup>C NMR (126 MHz, Chloroform-*d*) δ 162.8, 162.8 (d, *J* = 249.0 Hz), 140.3, 134.8, 132.9 (d, *J* = 3.0 Hz), 131.7, 131.3 (d, *J* = 8.9 Hz), 129.6 (q, *J* = 32.6 Hz), 128.1, 127.5, 126.8, 120.1 (q, *J* = 272.8 Hz), 116.1 (d, *J* = 23.0 Hz), 107.9 (q, *J* = 6.0 Hz), 21.7; HRMS (ESI-TOF) *m/z*: calcd for C<sub>17</sub>H<sub>12</sub>F<sub>4</sub>NO<sup>+</sup>: 322.0850 (M + H)<sup>+</sup>, found: 322.0847. m.p. 197-198 °C. IR (KBr): ν = 3094, 3043, 2927, 1659, 1507, 1316, 1131, 892 cm<sup>-1</sup>.

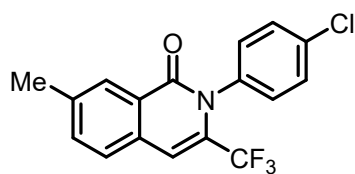

**3r**

**2-(4-chlorophenyl)-7-methyl-3-(trifluoromethyl)isoquinolin-1(2H)-one (3r)** (18.7 mg, 55%) was prepared from typical procedure (ethyl acetate: hexane = 1 : 10) as yellow solid.  $^1\text{H}$  NMR (500 MHz, Chloroform-*d*)  $\delta$  8.22 (s, 1H), 7.58 (t,  $J$  = 6.5 Hz, 2H), 7.48 (d,  $J$  = 8.6 Hz, 2H), 7.24 (d,  $J$  = 8.2 Hz, 2H), 7.11 (s, 1H), 2.53 (s, 3H);  $^{13}\text{C}$  NMR (126 MHz, Chloroform-*d*)  $\delta$  162.6, 140.3, 135.6, 135.3, 134.9, 131.7, 130.9, 129.4 (q,  $J$  = 32.8 Hz), 129.3, 128.1, 127.5, 126.8, 120.1 (q,  $J$  = 272.6 Hz), 108.0 (q,  $J$  = 5.9 Hz), 21.7; HRMS (ESI-TOF)  $m/z$ : calcd for  $\text{C}_{17}\text{H}_{12}\text{ClF}_3\text{NO}^+$ : 338.0554 ( $\text{M} + \text{H}$ ) $^+$ , found: 338.0552. m.p. 198-200 °C. IR (KBr):  $\nu$  = 3057, 2918, 1676, 1590, 1489, 1315, 858, 738  $\text{cm}^{-1}$ .

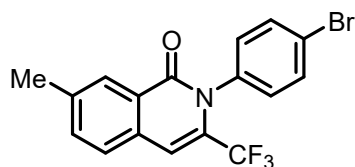

**3s**

**2-(4-bromophenyl)-7-methyl-3-(trifluoromethyl)isoquinolin-1(2H)-one (3s)** (24.4 mg, 64%) was prepared from typical procedure (ethyl acetate: hexane = 1 : 10) as Light yellow powder.  $^1\text{H}$  NMR (500 MHz, Chloroform-*d*)  $\delta$  8.22 (s, 1H), 7.64 (d,  $J$  = 8.3 Hz, 2H), 7.59 (q,  $J$  = 8.1 Hz, 2H), 7.17 (d,  $J$  = 8.2 Hz, 2H), 7.11 (s, 1H), 2.53 (s, 3H);  $^{13}\text{C}$  NMR (126 MHz, Chloroform-*d*)  $\delta$  162.6, 140.3, 136.2, 134.9, 132.3, 131.7, 131.2, 129.3 (q,  $J$  = 32.5 Hz), 128.1, 127.5, 126.8, 123.4, 120.1 (q,  $J$  = 273.0 Hz), 108.0 (q,  $J$  = 6.1 Hz), 21.7; HRMS (ESI-TOF)  $m/z$ : calcd for  $\text{C}_{17}\text{H}_{12}\text{BrF}_3\text{NO}^+$ : 382.0049 ( $\text{M} + \text{H}$ ) $^+$ , found: 382.0053. m.p. 119-120 °C. IR (KBr):  $\nu$  = 3098, 2918, 1663, 1503, 1487, 1315, 879, 654  $\text{cm}^{-1}$ .

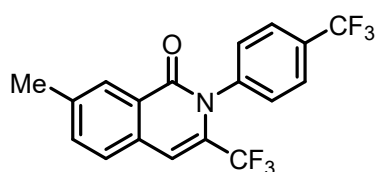

**3t**

**7-methyl-3-(trifluoromethyl)-2-(4-(trifluoromethyl)phenyl)isoquinolin-1(2H)-one (3t)** (15.1 mg, 41%) was prepared from typical procedure (ethyl acetate: hexane = 1 : 10) as white solid.  $^1\text{H}$  NMR (500 MHz, Chloroform-*d*)  $\delta$  8.22 (s, 1H), 7.78 (d,  $J$  = 8.2 Hz, 2H), 7.63 – 7.57 (m, 2H), 7.44 (d,  $J$  = 8.1 Hz, 2H), 7.14 (s, 1H), 2.54 (s, 3H);  $^{13}\text{C}$  NMR (126 MHz, Chloroform-*d*)  $\delta$  162.5, 140.5, 140.4, 135.0, 131.7, 131.5 (q,  $J$  = 32.8 Hz), 130.3, 129.2 (q,  $J$  = 32.8 Hz), 128.2, 127.6, 126.8, 126.3 (q,  $J$  = 3.7 Hz), 123.7 (q,  $J$  = 272.5 Hz), 120.1 (q,  $J$  = 272.9 Hz), 108.2 (q,  $J$  = 6.0 Hz), 21.7; HRMS (ESI-TOF)  $m/z$ : calcd for  $\text{C}_{18}\text{H}_{12}\text{F}_6\text{NO}^+$ : 372.0818 ( $\text{M} + \text{H}$ ) $^+$ , found: 372.0816. m.p. 190-192 °C. IR (KBr):  $\nu$  = 3060, 2925, 1678, 1609, 1505, 1315, 859  $\text{cm}^{-1}$ .

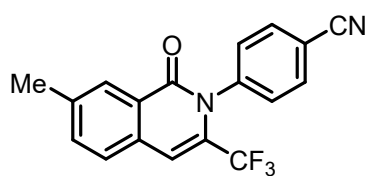

**3u**

**4-(7-methyl-1-oxo-3-(trifluoromethyl)isoquinolin-2(1H)-yl)benzonitrile (3u)** (18.1 mg, 55%) was prepared from typical procedure (ethyl acetate: hexane = 1 : 6) as white solid.  $^1\text{H}$  NMR (500 MHz, Chloroform-*d*)  $\delta$  8.21 (s, 1H), 7.82 (d,  $J$  = 8.5 Hz, 2H), 7.63 (dd,  $J$  = 8.2, 1.6 Hz, 1H), 7.60 (d,  $J$  = 8.1 Hz, 1H), 7.44 (d,  $J$  = 8.0 Hz, 2H), 7.14 (s, 1H), 2.54 (s, 3H);  $^{13}\text{C}$  NMR (126 MHz, Chloroform-*d*)  $\delta$  162.3, 141.4, 140.7, 135.2, 133.0, 131.6, 130.9, 128.9 (q,  $J$  = 32.8 Hz), 128.1, 127.7, 126.7, 120.0 (q,  $J$  = 273.0 Hz), 117.9, 113.5, 108.4 (q,  $J$  = 5.9 Hz), 21.7; HRMS (ESI-TOF)  $m/z$ : calcd for  $\text{C}_{18}\text{H}_{12}\text{F}_3\text{N}_2\text{O}^+$ : 329.0896 ( $\text{M} + \text{H}$ ) $^+$ , found: 329.0899. m.p. 179-180 °C. IR (KBr):  $\nu$  = 3099, 3067, 2926, 2231, 1669, 1603, 1504, 1314, 858  $\text{cm}^{-1}$ .

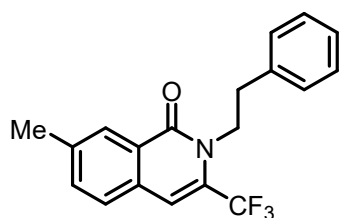

**3v**

**7-methyl-2-phenethyl-3-(trifluoromethyl)isoquinolin-1(2H)-one (3v)** (14.2 mg, 43%) was prepared from typical procedure (ethyl acetate: hexane = 1 : 20) as white solid.  $^1\text{H}$  NMR (500 MHz, Chloroform-*d*)  $\delta$  8.29 (s, 1H), 7.56 (d,  $J$  = 8.0 Hz, 1H), 7.52 (d,  $J$  = 8.0 Hz, 1H), 7.39 – 7.31 (m, 4H), 7.26 (d,  $J$  = 7.3 Hz, 1H), 7.07 (s, 1H), 4.33 – 4.26 (m, 2H), 3.07 – 3.01 (m, 2H), 2.54 (s, 3H);  $^{13}\text{C}$  NMR (126 MHz, Chloroform-*d*)  $\delta$  162.2, 139.9, 138.3, 134.4, 131.5, 129.0, 128.9 (q,  $J$  = 45.0 Hz), 128.6, 127.7, 127.3, 126.9, 126.6, 120.9 (q,  $J$  = 272.9 Hz), 108.2 (q,  $J$  = 6.6 Hz), 47.6 (q,  $J$  = 2.9 Hz), 34.7, 21.7; HRMS (ESI-TOF)  $m/z$ : calcd for  $\text{C}_{19}\text{H}_{16}\text{F}_3\text{NOK}^+$ : 370.0816 ( $\text{M} + \text{K}$ ) $^+$ , found: 370.0818. m.p. 83-85 °C. IR (KBr):  $\nu$  = 3056, 3031, 2954, 2941, 1660, 1498, 1461, 1304, 860  $\text{cm}^{-1}$ .

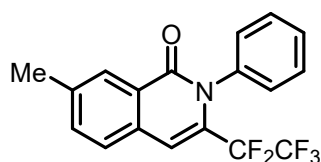

**3w**

**7-methyl-3-(perfluoroethyl)-2-phenylisoquinolin-1(2H)-one (3w)** (16.5 mg, 47%) was prepared from typical procedure (ethyl acetate: hexane = 1 : 10) as white solid.  $^1\text{H}$  NMR (500 MHz, Chloroform-*d*)  $\delta$  8.22 (s, 1H), 7.62 – 7.55 (m, 2H), 7.52 – 7.46 (m, 3H), 7.26 (d,  $J$  = 7.1 Hz, 2H), 7.02 (s, 1H), 2.53 (s, 3H);  $^{13}\text{C}$  NMR (126 MHz, Chloroform-*d*)  $\delta$  163.1, 140.4, 137.8, 134.8, 131.7, 129.5, 129.0, 128.8, 128.1, 128.1 (t,  $J$  = 23.3 Hz), 127.5, 127.0, 119.6 (t,  $J$  = 37.5 Hz), 117.3 (t,  $J$  = 37.7 Hz), 110.5 (t,  $J$  = 6.9 Hz), 21.7;

HRMS (ESI-TOF)  $m/z$ : calcd for  $C_{18}H_{13}F_5NO^+$ : 354.0912 ( $M + H$ )<sup>+</sup>, found: 354.0909. m.p. 152-153 °C. IR (KBr):  $\nu = 3087, 3064, 3034, 2962, 1661, 1608, 1501, 1489, 12137, 885\text{ cm}^{-1}$ .

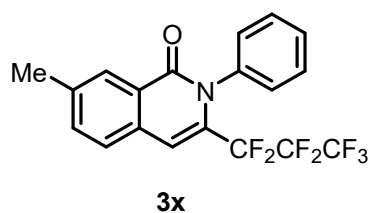

**7-methyl-3-(perfluoropropyl)-2-phenylisoquinolin-1(2H)-one (3x)** (16 mg, 40%) was prepared from typical procedure (ethyl acetate: hexane = 1 : 10) as white solid. <sup>1</sup>H NMR (500 MHz, Chloroform-*d*)  $\delta$  8.22 (s, 1H), 7.60 (d,  $J = 1.8$  Hz, 2H), 7.51 – 7.44 (m, 3H), 7.29 – 7.21 (m, 2H), 7.04 (s, 1H), 2.53 (s, 3H); <sup>13</sup>C NMR (126 MHz, Chloroform-*d*)  $\delta$  163.1, 140.4, 137.8, 134.8, 131.7, 129.4, 129.0, 128.8, 128.2, 127.5, 127.0, 111.2 (t,  $J = 8.8$  Hz), 21.7; HRMS (ESI-TOF)  $m/z$ : calcd for  $C_{19}H_{13}F_7NO^+$ : 404.0880 ( $M + H$ )<sup>+</sup>, found: 404.0881. m.p. 156-157 °C. IR (KBr):  $\nu = 3086, 2928, 1655, 1596, 1502, 1489, 1226, 877\text{ cm}^{-1}$ .

#### 2.4 Procedure for Synthesis of 4

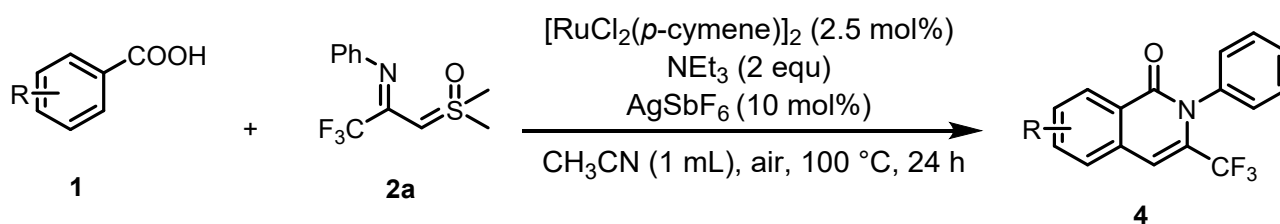

A dried 10 mL Schlenk tube was charged with **benzoic acid 1** (0.1 mmol, 1 equiv), **(*E*)-3-(dimethyl(oxo)- $\lambda$ 6-sulfanylidene)-1,1,1-trifluoro-*N*-phenylpropan-2-imine 2a** (39.5 mg, 0.15 mmol, 1.5 equiv),  $[Ru(p\text{-cymene})Cl_2]_2$  (1.6 mg, 2.5 mol%),  $NEt_3$  (20.2 mg, 0.2 mmol, 2.0 equiv),  $AgSbF_6$  (3.4 mg, 20 mol%) and  $CH_3CN$  (1 mL). The reaction mixture was heated to 100 °C on a heating plate for 24 hours under vigorous stirring. Upon completion, the reaction mixture was cooled to room temperature, diluted with ethyl acetate, and filtered through a pad of celite. The filtrate was concentrated under vacuum, and the resulting residue was purified by preparative thin layer chromatography (PTLC) with ethyl acetate : hexane to give the corresponding products.

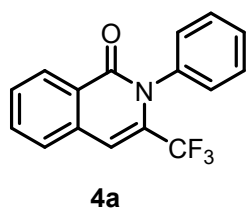

**2-phenyl-3-(trifluoromethyl)isoquinolin-1(2H)-one (4a)** (16.7 mg, 58%) was prepared from typical procedure (ethyl acetate: hexane = 1 : 10) as white solid. <sup>1</sup>H NMR (500 MHz, Chloroform-*d*)  $\delta$  8.44 (d,  $J = 8.0$  Hz, 1H), 7.77 (ddd,  $J = 8.3, 7.1, 1.4$  Hz, 1H), 7.68 (d,  $J = 7.3$  Hz, 1H), 7.65 (ddd,  $J = 8.3, 7.2, 1.3$

Hz, 1H), 7.56 – 7.47 (m, 3H), 7.32 – 7.29 (m, 2H), 7.14 (s, 1H);  $^{13}\text{C}$  NMR (126 MHz, Chloroform-*d*)  $\delta$  162.7, 137.0, 134.2, 133.3, 130.7 (q,  $J = 32.7$  Hz), 129.5, 129.3, 129.0, 128.5, 127.5, 127.2, 120.1 (q,  $J = 273.4$  Hz), 107.6 (q,  $J = 6.2$  Hz); HRMS (ESI-TOF)  $m/z$ : calcd for  $\text{C}_{16}\text{H}_{11}\text{F}_3\text{NO}^+$ : 290.0787 (M + H) $^+$ , found: 290.0788. m.p. 183-184 °C. IR (KBr):  $\nu = 3097, 1658, 1599, 1488, 1455, 1322, 764, 694$   $\text{cm}^{-1}$ .

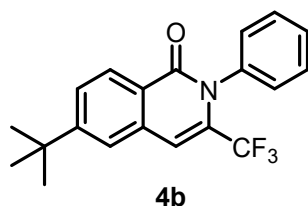

**6-(tert-butyl)-2-phenyl-3-(trifluoromethyl)isoquinolin-1(2H)-one (4b)** (18.8 mg, 54%) was prepared from typical procedure (ethyl acetate: hexane = 1 : 10) as yellow solid.  $^1\text{H}$  NMR (500 MHz, Chloroform-*d*)  $\delta$  8.36 (d,  $J = 8.4$  Hz, 1H), 7.71 (dd,  $J = 8.4, 1.8$  Hz, 1H), 7.64 (s, 1H), 7.50 (d,  $J = 6.9$  Hz, 3H), 7.29 (d,  $J = 7.2$  Hz, 2H), 7.14 (s, 1H), 1.42 (s, 3H);  $^{13}\text{C}$  NMR (126 MHz, Chloroform-*d*)  $\delta$  162.6, 157.2, 137.1, 134.2, 130.5 (q,  $J = 32.4$  Hz), 129.5, 129.2, 129.0, 128.3, 127.6, 124.8, 123.7, 120.2 (d,  $J = 273.1$  Hz), 108.1 (q,  $J = 6.0$  Hz), 35.3, 31.1; HRMS (ESI-TOF)  $m/z$ : calcd for  $\text{C}_{20}\text{H}_{19}\text{F}_3\text{NO}^+$ : 346.1413 (M + H) $^+$ , found: 346.1418. m.p. 103-105 °C. IR (KBr):  $\nu = 3066, 2964, 2869, 1675, 1605, 1490, 1304, 889$   $\text{cm}^{-1}$ .

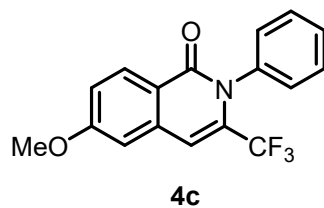

**6-methoxy-2-phenyl-3-(trifluoromethyl)isoquinolin-1(2H)-one (4c)** (15.3 mg, 48%) was prepared from typical procedure (ethyl acetate: hexane = 1 : 6) as brown yellow solid.  $^1\text{H}$  NMR (500 MHz, Chloroform-*d*)  $\delta$  8.35 (d,  $J = 8.8$  Hz, 1H), 7.54 – 7.46 (m, 3H), 7.30 (dd,  $J = 7.1, 1.2$  Hz, 2H), 7.19 (dd,  $J = 8.9, 2.5$  Hz, 1H), 7.05 (s, 1H), 7.03 (d,  $J = 2.5$  Hz, 1H), 3.95 (s, 3H);  $^{13}\text{C}$  NMR (126 MHz, Chloroform-*d*)  $\delta$  163.5, 162.4, 137.1, 136.3, 131.3 (q,  $J = 32.6$  Hz), 130.6, 129.6, 129.2, 129.0, 120.7, 120.1 (q,  $J = 273.4$  Hz), 118.5, 108.7, 107.3 (q,  $J = 6.1$  Hz), 55.7; HRMS (ESI-TOF)  $m/z$ : calcd for  $\text{C}_{17}\text{H}_{13}\text{F}_3\text{NO}_2^+$ : 320.0893 (M + H) $^+$ , found: 320.0898. m.p. 171-172 °C. IR (KBr):  $\nu = 3047, 2928, 1675, 1605, 1488, 1307, 1016, 862$   $\text{cm}^{-1}$ .

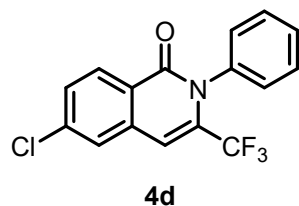

**6-chloro-2-phenyl-3-(trifluoromethyl)isoquinolin-1(2H)-one (4d)** (13.5 mg, 42%) was prepared from typical procedure (ethyl acetate: hexane = 1 : 10) as pale solid.  $^1\text{H}$  NMR (500 MHz, Chloroform-*d*)  $\delta$  8.37



(d,  $J = 8.5$  Hz, 1H), 7.66 (d,  $J = 2.0$  Hz, 1H), 7.58 (dd,  $J = 8.6, 2.1$  Hz, 1H), 7.56 – 7.48 (m, 3H), 7.31 – 7.28 (m, 2H), 7.04 (s, 1H);  $^{13}\text{C}$  NMR (126 MHz, Chloroform-*d*)  $\delta$  162.1, 139.9, 136.7, 135.5, 132.1 (q,  $J = 32.4$  Hz), 130.4, 130.0, 129.4, 129.4, 129.1, 126.8, 125.4, 119.9 (q,  $J = 273.6$  Hz), 106.4 (q,  $J = 6.1$  Hz); HRMS (ESI-TOF)  $m/z$ : calcd for  $\text{C}_{16}\text{H}_{10}\text{ClF}_3\text{NO}^+$ : 324.0398 ( $\text{M} + \text{H}$ ) $^+$ , found: 324.0399. m.p. 178–180 °C. IR (KBr):  $\nu = 3092, 3070, 3047, 1663, 1595, 1489, 1294, 857, 732$   $\text{cm}^{-1}$ .

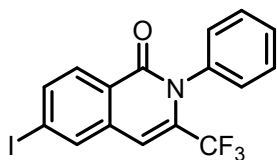

**4e**

**6-iodo-2-phenyl-3-(trifluoromethyl)isoquinolin-1(2H)-one (4e)** (17.3 mg, 42%) was prepared from typical procedure (ethyl acetate: hexane = 1 : 10) as light yellow solid.  $^1\text{H}$  NMR (500 MHz, Chloroform-*d*)  $\delta$  8.11 (d,  $J = 8.4$  Hz, 1H), 8.07 (d,  $J = 1.6$  Hz, 1H), 7.94 (dd,  $J = 8.4, 1.7$  Hz, 1H), 7.51 (dd,  $J = 5.2, 2.0$  Hz, 3H), 7.30 – 7.27 (m, 2H), 7.01 (s, 1H);  $^{13}\text{C}$  NMR (126 MHz, Chloroform-*d*)  $\delta$  162.5, 138.5, 136.7, 136.2, 135.6, 131.8 (q,  $J = 32.9$  Hz), 130.0, 129.4, 129.3, 129.1, 126.3, 119.9 (q,  $J = 273.7$  Hz), 106.1 (q,  $J = 5.8$  Hz), 101.0; HRMS (ESI-TOF)  $m/z$ : calcd for  $\text{C}_{16}\text{H}_{10}\text{IF}_3\text{NO}^+$ : 415.9754 ( $\text{M} + \text{H}$ ) $^+$ , found: 415.9753. m.p. 157–158 °C. IR (KBr):  $\nu = 3082, 3059, 1671, 1585, 1488, 1294, 886, 532$   $\text{cm}^{-1}$ .

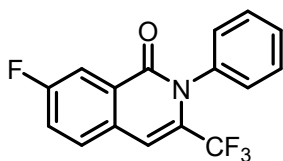

**4f**

**7-fluoro-2-phenyl-3-(trifluoromethyl)isoquinolin-1(2H)-one (4f)** (15.5 mg, 50%) was prepared from typical procedure (ethyl acetate: hexane = 1 : 10) as white solid.  $^1\text{H}$  NMR (500 MHz, Chloroform-*d*)  $\delta$  8.23 (d,  $J = 8.0$  Hz, 1H), 7.60 (td,  $J = 8.0, 5.2$  Hz, 1H), 7.55 – 7.50 (m, 3H), 7.47 (ddd,  $J = 9.3, 8.0, 1.1$  Hz, 1H), 7.36 (s, 1H), 7.32 – 7.28 (m, 2H);  $^{13}\text{C}$  NMR (126 MHz, Chloroform-*d*)  $\delta$  161.8, 158.4 (d,  $J = 254.3$  Hz), 136.8, 131.3 (q,  $J = 32.5$  Hz), 130.0 (d,  $J = 8.0$  Hz), 129.4, 129.4, 129.1, 128.6 (d,  $J = 2.7$  Hz), 124.2 (d,  $J = 3.9$  Hz), 123.7 (d,  $J = 16.0$  Hz), 119.9 (q,  $J = 273.6$  Hz), 118.4 (d,  $J = 19.6$  Hz), 100.3 (q,  $J = 6.1$  Hz); HRMS (ESI-TOF)  $m/z$ : calcd for  $\text{C}_{16}\text{H}_{10}\text{F}_4\text{NO}^+$ : 308.0693 ( $\text{M} + \text{H}$ ) $^+$ , found: 308.0690. m.p. 122–124 °C. IR (KBr):  $\nu = 3057, 1676, 1591, 1491, 1481, 1300, 1138, 853$   $\text{cm}^{-1}$ .

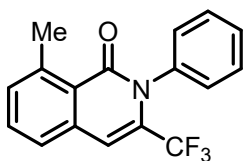

**4g**

**8-methyl-2-phenyl-3-(trifluoromethyl)isoquinolin-1(2H)-one (4g)** (18.8 mg, 62%) was prepared from typical procedure (ethyl acetate: hexane = 1 : 10) as white solid.  $^1\text{H}$  NMR (500 MHz, Chloroform-*d*)  $\delta$

7.59 (t,  $J = 7.7$  Hz, 1H), 7.55 – 7.44 (m, 4H), 7.40 (d,  $J = 7.4$  Hz, 1H), 7.30 (dd,  $J = 7.2, 1.2$  Hz, 2H), 7.04 (s, 1H), 2.87 (s, 3H);  $^{13}\text{C}$  NMR (126 MHz, Chloroform-*d*)  $\delta$  163.5, 142.9, 137.3, 136.0, 132.7, 132.5, 130.3 (q,  $J = 32.9$  Hz), 129.6, 129.1, 129.1, 125.9, 125.4, 120.0 (q,  $J = 273.1$  Hz), 108.0 (q,  $J = 6.1$  Hz), 23.7; HRMS (ESI-TOF)  $m/z$ : calcd for  $\text{C}_{17}\text{H}_{13}\text{F}_3\text{NO}^+$ : 304.0944 ( $\text{M} + \text{H}$ ) $^+$ , found: 304.0943. m.p. 158-159 °C. IR (KBr):  $\nu = 3095, 3067, 3042, 2924, 1665, 1594, 1491, 1474, 1300, 875$   $\text{cm}^{-1}$ .

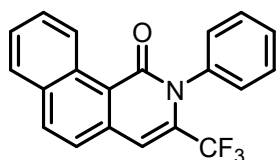

**4h**

**2-phenyl-3-(trifluoromethyl)benzo[h]isoquinolin-1(2H)-one (4h)** (19.9 mg, 59%) was prepared from typical procedure (ethyl acetate: hexane = 1 : 10) as light yellow solid.  $^1\text{H}$  NMR (500 MHz, Chloroform-*d*)  $\delta$  10.07 (d,  $J = 8.1$  Hz, 1H), 8.15 (d,  $J = 8.5$  Hz, 1H), 7.95 (dd,  $J = 7.9, 1.6$  Hz, 1H), 7.72 (ddd,  $J = 8.7, 6.9, 1.6$  Hz, 1H), 7.67 (ddd,  $J = 8.4, 7.0, 1.5$  Hz, 1H), 7.64 (d,  $J = 8.5$  Hz, 1H), 7.60 – 7.51 (m, 3H), 7.36 (d,  $J = 6.6$  Hz, 2H), 7.24 (s, 1H);  $^{13}\text{C}$  NMR (126 MHz, Chloroform-*d*)  $\delta$  163.1, 137.4, 136.3, 135.0, 133.6, 131.6, 131.4 (q,  $J = 33.0$  Hz), 129.5, 129.3, 129.1, 129.0, 128.5, 127.6, 127.5, 124.8, 121.4, 120.0 (q,  $J = 273.4$  Hz), 107.7 (q,  $J = 5.7$  Hz); HRMS (ESI-TOF)  $m/z$ : calcd for  $\text{C}_{20}\text{H}_{13}\text{F}_3\text{NO}^+$ : 340.0944 ( $\text{M} + \text{H}$ ) $^+$ , found: 340.0944. m.p. 176-177 °C. IR (KBr):  $\nu = 3067, 1666, 1600, 1488, 1290, 857, 748$   $\text{cm}^{-1}$ .

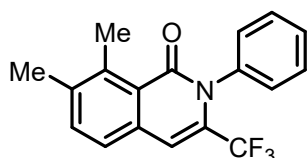

**4i**

**7,8-dimethyl-2-phenyl-3-(trifluoromethyl)isoquinolin-1(2H)-one (4i)** (22.4 mg, 71%) was prepared from typical procedure (ethyl acetate: hexane = 1 : 15) as white solid.  $^1\text{H}$  NMR (500 MHz, Chloroform-*d*)  $\delta$  7.56 – 7.45 (m, 4H), 7.39 (d,  $J = 7.9$  Hz, 1H), 7.29 (d,  $J = 7.2$  Hz, 2H), 7.01 (s, 1H), 2.83 (s, 3H), 2.45 (s, 3H);  $^{13}\text{C}$  NMR (126 MHz, Chloroform-*d*)  $\delta$  163.8, 141.0, 139.3, 137.6, 134.9, 134.1, 129.7, 129.5 (q,  $J = 32.8$  Hz), 129.0 (d,  $J = 2.1$  Hz), 125.3, 125.1, 120.1 (q,  $J = 272.7$  Hz), 108.2 (q,  $J = 6.0$  Hz), 21.4, 17.8; HRMS (ESI-TOF)  $m/z$ : calcd for  $\text{C}_{18}\text{H}_{15}\text{F}_3\text{NO}^+$ : 318.1100 ( $\text{M} + \text{H}$ ) $^+$ , found: 318.1101. m.p. 148-149 °C. IR (KBr):  $\nu = 3073, 2925, 1670, 1593, 1491, 1302, 860$   $\text{cm}^{-1}$ .

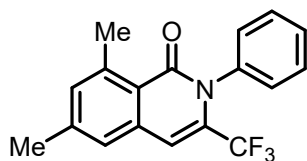

**4j**

**6,8-dimethyl-2-phenyl-3-(trifluoromethyl)isoquinolin-1(2H)-one (4j)** (23.4 mg, 74%) was prepared from typical procedure (ethyl acetate: hexane = 1 : 15) as light yellow solid.  $^1\text{H}$  NMR (500 MHz,

Chloroform-*d*)  $\delta$  7.54 – 7.45 (m, 3H), 7.31 – 7.26 (m, 33H), 7.22 (s, 1H), 6.98 (s, 1H), 2.83 (s, 3H), 2.46 (s, 3H);  $^{13}\text{C}$  NMR (126 MHz, Chloroform-*d*)  $\delta$  163.4, 143.2, 142.7, 137.4, 136.1, 134.1, 130.3 (q,  $J = 32.5$  Hz), 129.7, 129.0, 125.8, 123.1, 120.1 (q,  $J = 272.9$  Hz), 107.9 (q,  $J = 5.9$  Hz), 23.5, 21.4; HRMS (ESI-TOF)  $m/z$ : calcd for  $\text{C}_{18}\text{H}_{15}\text{F}_3\text{NO}^+$ : 318.1100 ( $\text{M} + \text{H}$ ) $^+$ , found: 318.1098. m.p. 153-154 °C. IR (KBr):  $\nu = 3100, 3067, 2923, 1669, 1608, 1492, 1301, 862$   $\text{cm}^{-1}$ .

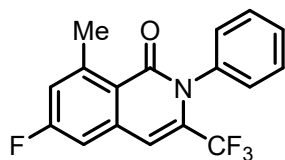

**4k**

**6-fluoro-8-methyl-2-phenyl-3-(trifluoromethyl)isoquinolin-1(2H)-one (4k)** (19.3 mg, 60%) was prepared from typical procedure (ethyl acetate: hexane = 1 : 15) as yellow solid.  $^1\text{H}$  NMR (500 MHz, Chloroform-*d*)  $\delta$  7.56 – 7.47 (m, 3H), 7.29 (d,  $J = 7.1$  Hz, 2H), 7.12 (td,  $J = 8.6, 8.2, 2.6$  Hz, 2H), 6.98 (s, 1H), 2.86 (s, 3H);  $^{13}\text{C}$  NMR (126 MHz, Chloroform-*d*)  $\delta$  164.3 (d,  $J = 254.4$  Hz), 162.8, 147.1 (d,  $J = 9.6$  Hz), 138.4 (d,  $J = 10.7$  Hz), 137.0, 131.6 (q,  $J = 32.7$  Hz), 129.6, 129.2, 129.1, 122.1 (d,  $J = 1.7$  Hz), 120.4 (d,  $J = 22.2$  Hz), 119.9 (q,  $J = 273.4$  Hz), 110.9 (d,  $J = 21.6$  Hz), 107.2 (q,  $J = 5.9, 3.4$  Hz), 23.9; HRMS (ESI-TOF)  $m/z$ : calcd for  $\text{C}_{17}\text{H}_{12}\text{F}_4\text{NO}^+$ : 322.0850 ( $\text{M} + \text{H}$ ) $^+$ , found: 322.0853. m.p. 169-170 °C. IR (KBr):  $\nu = 3096, 3072, 2925, 1670, 1601, 1489, 1301, 1129, 758$   $\text{cm}^{-1}$ .

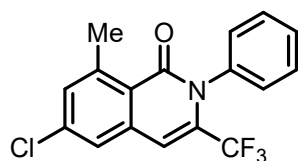

**4l**

**6-chloro-8-methyl-2-phenyl-3-(trifluoromethyl)isoquinolin-1(2H)-one (4l)** (19.7 mg, 58%) was prepared from typical procedure (ethyl acetate: hexane = 1 : 15) as yellow solid.  $^1\text{H}$  NMR (500 MHz, Chloroform-*d*)  $\delta$  7.56 – 7.47 (m, 3H), 7.47 (d,  $J = 2.1$  Hz, 1H), 7.37 (d,  $J = 1.2$  Hz, 1H), 7.28 (dd,  $J = 6.9, 1.4$  Hz, 2H), 6.95 (s, 1H), 2.83 (s, 3H);  $^{13}\text{C}$  NMR (126 MHz, Chloroform-*d*)  $\delta$  162.9, 145.2, 138.6, 137.3, 137.0, 132.5, 131.6 (q,  $J = 32.9$  Hz), 129.5, 129.3, 129.1, 125.0, 123.8, 119.8 (q,  $J = 273.5$  Hz), 106.9 (q,  $J = 5.9$  Hz), 23.6; HRMS (ESI-TOF)  $m/z$ : calcd for  $\text{C}_{17}\text{H}_{12}\text{ClF}_3\text{NO}^+$ : 338.0554 ( $\text{M} + \text{H}$ ) $^+$ , found: 338.0550. m.p. 161-162 °C. IR (KBr):  $\nu = 3089, 3069, 2926, 1670, 1583, 1491, 1294, 894, 733$   $\text{cm}^{-1}$ .

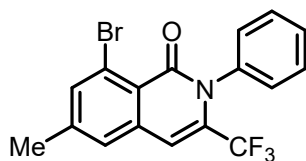

**4m**

**8-bromo-6-methyl-2-phenyl-3-(trifluoromethyl)isoquinolin-1(2H)-one (4m)** (16 mg, 42%) was prepared from typical procedure (ethyl acetate: hexane = 1 : 15) as light yellow solid.  $^1\text{H}$  NMR (500 MHz,

Chloroform-*d*)  $\delta$  7.74 (s, 1H), 7.52 – 7.46 (m, 3H), 7.38 (s, 1H), 7.28 (d,  $J = 7.2$  Hz, 2H), 6.97 (s, 1H), 2.47 (s, 3H);  $^{13}\text{C}$  NMR (126 MHz, Chloroform-*d*)  $\delta$  160.9, 144.3, 137.8, 137.2, 136.9, 131.3 (q,  $J = 32.8$  Hz), 129.6, 129.2, 129.0, 127.5, 123.8, 122.2, 119.8 (q,  $J = 273.4$  Hz), 107.0 (q,  $J = 6.0$  Hz), 21.1; HRMS (ESI-TOF)  $m/z$ : calcd for  $\text{C}_{17}\text{H}_{12}\text{BrF}_3\text{NO}^+$ : 382.0049 (M + H) $^+$ , found: 382.0047. m.p. 172-173 °C. IR (KBr):  $\nu = 3067, 2921, 1671, 1604, 1488, 1293, 867, 685$   $\text{cm}^{-1}$ .

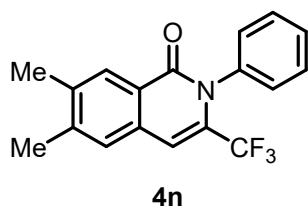

**6,7-dimethyl-2-phenyl-3-(trifluoromethyl)isoquinolin-1(2H)-one (4n)** (22.6 mg, 71%) was prepared from typical procedure (ethyl acetate: hexane = 1 : 15) as Light yellow solid.  $^1\text{H}$  NMR (500 MHz, Chloroform-*d*)  $\delta$  8.17 (s, 1H), 7.53 – 7.45 (m, 3H), 7.42 (s, 1H), 7.29 (d,  $J = 7.1$  Hz, 2H), 7.04 (s, 1H), 2.43 (s, 3H), 2.42 (s, 3H);  $^{13}\text{C}$  NMR (126 MHz, Chloroform-*d*)  $\delta$  162.6, 143.4, 139.4, 137.3, 132.3, 129.8 (q,  $J = 32.3$  Hz), 129.5, 129.1, 128.9, 128.6, 127.8, 125.1, 120.2 (q,  $J = 273.0$  Hz), 107.4 (q,  $J = 6.1$  Hz), 20.2, 20.0; HRMS (ESI-TOF)  $m/z$ : calcd for  $\text{C}_{18}\text{H}_{15}\text{F}_3\text{NO}^+$ : 318.1100 (M + H) $^+$ , found: 460.1097. m.p. 126-128 °C. IR (KBr):  $\nu = 3058, 2920, 2856, 1672, 1593, 1489, 1300, 881$   $\text{cm}^{-1}$ .

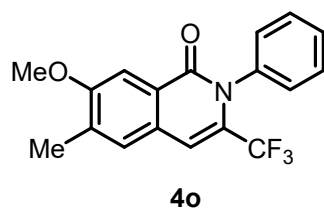

**7-methoxy-6-methyl-2-phenyl-3-(trifluoromethyl)isoquinolin-1(2H)-one (4o)** (25.1 mg, 75%) was prepared from typical procedure (ethyl acetate: hexane = 1 : 10) as white solid.  $^1\text{H}$  NMR (500 MHz, Chloroform-*d*)  $\delta$  7.76 (s, 1H), 7.55 – 7.46 (m, 3H), 7.43 (s, 1H), 7.30 (d,  $J = 7.9$  Hz, 2H), 7.05 (s, 1H), 3.95 (s, 3H), 2.38 (s, 4H);  $^{13}\text{C}$  NMR (126 MHz, Chloroform-*d*)  $\delta$  162.5, 159.5, 137.4, 134.9, 129.5, 129.1, 129.1, 128.9, 128.3 (q,  $J = 32.6$  Hz), 127.8, 126.7, 120.4 (q,  $J = 272.6$  Hz), 107.5 (q,  $J = 6.1$  Hz), 106.7, 55.8, 16.8; HRMS (ESI-TOF)  $m/z$ : calcd for  $\text{C}_{18}\text{H}_{15}\text{F}_3\text{NO}_2^+$ : 334.1049 (M + H) $^+$ , found: 334.1049. m.p. 168-169 °C. IR (KBr):  $\nu = 3065, 3045, 2960, 2925, 1663, 1592, 1505, 1490, 1302, 1011, 893$   $\text{cm}^{-1}$ .

## 2.5 Procedure for the Gram-Scale Synthesis of 3a

A dried 100 mL Schlenk tube was charged with **3-methylbenzoic acid 1a** (680.8 mg, 5 mmol, 1 equiv), **(E)-3-(dimethyl(oxo)- $\lambda^6$ -sulfanylidene)-1,1,1-trifluoro-N-phenylpropan-2-imine 2a** (1.97 g, 7.5 mmol, 1.5 equiv),  $[\text{Ru}(p\text{-cymene})\text{Cl}_2]_2$  (76.5 mg, 2.5 mol%),  $\text{NEt}_3$  (1.01 g, 10 mmol, 2 equiv),  $\text{AgSbF}_6$  (171.8 mg, 20 mol%), and  $\text{CH}_3\text{CN}$  (50 mL). The reaction mixture was heated to 100 °C on an oil bath for 24 hours under vigorous stirring. Upon completion, the reaction

mixture was cooled to room temperature, diluted with ethyl acetate, and filtered through a pad of celite. The filtrate was concentrated under vacuum, and the resulting residue was purified by flash chromatography on silica gel with ethyl acetate/hexane (1 : 20) to give the corresponding products **7-methyl-2-phenyl-3-(trifluoromethyl)isoquinolin-1(2H)-one (3a)** (1.016 g, 67%) as a brown solid.

## 2.6 Procedure for the Synthesis of D-1a

A dried 10 mL Schlenk tube was charged with **3-methylbenzoic acid 1a** (13.6 mg, 0.1 mmol, 1 equiv), [Ru(*p*-cymene)Cl<sub>2</sub>]<sub>2</sub> (1.6 mg, 2.5 mol%), NEt<sub>3</sub> (20.2 mg, 0.2 mmol, 2.0 equiv), AgSbF<sub>6</sub> (3.4 mg, 20 mol%), CD<sub>3</sub>OD (0.1 mL) and CH<sub>3</sub>CN (1 mL). The reaction mixture was heated to 100 °C on a heating plate for 24 hours under vigorous stirring. Upon completion, the reaction mixture was cooled to room temperature, diluted with ethyl acetate, and filtered through a pad of celite. The filtrate was concentrated under vacuum, and the resulting residue was purified by preparative thin layer chromatography (PTLC) with ethyl acetate : hexane (1:10) to give the corresponding products.

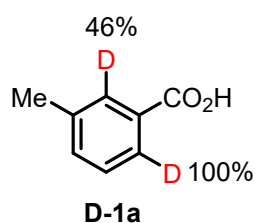

<sup>1</sup>H NMR (500 MHz, Chloroform-*d*) δ 7.93 (d, *J* = 9.5 Hz, 0.54H), 7.43 (d, *J* = 7.6 Hz, 1H), 7.39 – 7.35 (m, 1H), 2.43 (s, 3H).

## 2.7 Procedure for the Synthesis of D-3a

A dried 10 mL Schlenk tube was charged with **3-methylbenzoic acid 1a** (13.6 mg, 0.1 mmol, 1 equiv), **(*E*)-3-(dimethyl(oxo)-<sup>λ</sup>6-sulfanylidene)-1,1,1-trifluoro-*N*-phenylpropan-2-imine 2a** (39.5 mg, 0.15 mmol, 1.5 equiv), [Ru(*p*-cymene)Cl<sub>2</sub>]<sub>2</sub> (1.6 mg, 2.5 mol%), NEt<sub>3</sub> (20.2 mg, 0.2 mmol, 2.0 equiv), AgSbF<sub>6</sub> (3.4 mg, 20 mol%), CD<sub>3</sub>OD (0.1 mL) and CH<sub>3</sub>CN (1 mL). The reaction mixture was heated to 100 °C on a heating plate for 24 hours under vigorous stirring. Upon completion, the reaction mixture was cooled to room temperature, diluted with ethyl acetate, and filtered through a pad of celite. The filtrate was concentrated under vacuum, and the resulting residue was purified by preparative thin layer chromatography (PTLC) with ethyl acetate : hexane (1:20) to give the corresponding products.

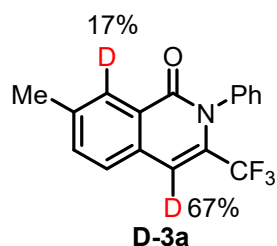

$^1\text{H}$  NMR (500 MHz, Chloroform-*d*)  $\delta$  8.23 (s, 0.83H), 7.58 (d,  $J$  = 1.8 Hz, 2H), 7.53 – 7.46 (m, 3H), 7.30 (d,  $J$  = 7.9 Hz, 2H), 7.11 (s, 0.33H), 2.53 (s, 3H).

## 2.8 Kinetic Isotope Effect Experiment

A dried 10 mL Schlenk tube was charged with **benzoic acid 1b** (6.1 mg, 0.05 mmol), **D5-benzoic acid** (6.4 mg, 0.05 mmol), **(E)-3-(dimethyl(oxo)- $\lambda^6$ -sulfanylidene)-1,1,1-trifluoro-*N*-phenylpropan-2-imine 2a** (39.5 mg, 0.15 mmol),  $[\text{Ru}(p\text{-cymene})\text{Cl}_2]_2$  (1.6 mg, 2.5 mol%),  $\text{NEt}_3$  (20.2 mg, 0.2 mmol, 2.0 equiv),  $\text{AgSbF}_6$  (3.4 mg, 20 mol%), and  $\text{CH}_3\text{CN}$  (1 mL). The reaction mixture was heated to 100 °C on a heating plate for 24 hours under vigorous stirring. Upon completion, the reaction mixture was cooled to room temperature, diluted with ethyl acetate, and filtered through a pad of celite. The filtrate was concentrated under vacuum, and the resulting residue was purified by preparative thin layer chromatography (PTLC) with ethyl acetate : hexane (1:20) to give the corresponding products.

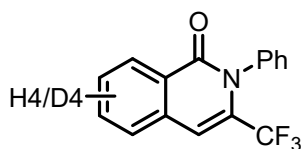

**4a/4a-D4**

$^1\text{H}$  NMR (500 MHz, Chloroform-*d*)  $\delta$  8.44 (d,  $J$  = 7.9 Hz, 0.69H), 7.81 – 7.74 (m, 0.75H), 7.70 – 7.63 (m, 1.5H), 7.55 – 7.48 (m, 3H), 7.31 (d,  $J$  = 5.5 Hz, 2H), 7.14 (d,  $J$  = 1.7 Hz, 1H).

## Intermolecular Kinetic Isotope Effect Experiment

Five parallel independent reactions of **1b** or **[D]<sub>5</sub>-1b** with **2a**, respectively, were performed to determine the corresponding KIE value. **1b** (6.1 mg, 0.05 mmol) or **[D]<sub>5</sub>-1b** (6.4 mg, 0.05 mmol), **2a** (19.7 mg, 0.15 mmol),  $[\text{RuCl}_2(p\text{-cymene})]_2$  (0.8 mg, 2.5 mol%),  $\text{AgSbF}_6$  (1.7 mg, 10 mol%),  $\text{NEt}_3$  (10.1 mg, 2.0 equiv), and  $\text{CH}_3\text{CN}$  (0.5 mL) were placed in a 25 mL Schlenk flask under vigorous stirring. Upon completion, the reaction mixture was cooled to room temperature, diluted with ethyl acetate, and filtered through a pad of celite. The filtrate was concentrated under vacuum, Then  $^1\text{H}$  NMR conversions were obtained by the use of  $\text{CH}_2\text{Br}_2$  as the standard.

| Time<br>yield        | 20 min | 30 min | 40 min | 50 min | 60 min |
|----------------------|--------|--------|--------|--------|--------|
| 4a                   | 24%    | 31%    | 40%    | 48%    | 54%    |
| [D] <sub>4</sub> -4a | 18%    | 20%    | 23%    | 26%    | 28%    |

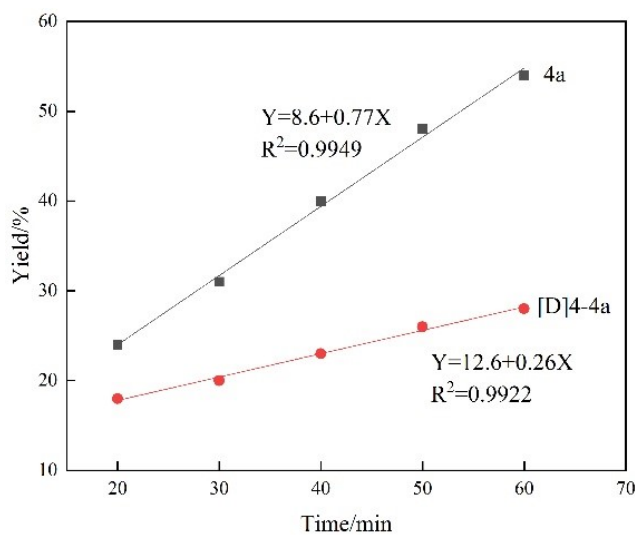

$$k_H/k_D = 3$$

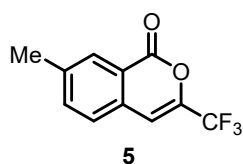

Compound **5** was synthesized according to literature.<sup>2</sup> <sup>1</sup>H NMR (500 MHz, Chloroform-*d*)  $\delta$  8.16 (s, 1H), 7.63 (dd,  $J = 8.0, 1.8$  Hz, 1H), 7.47 (d,  $J = 7.9$  Hz, 1H), 6.97 (s, 1H), 2.52 (s, 3H).

## 2.9 Synthetic Applications of 3a

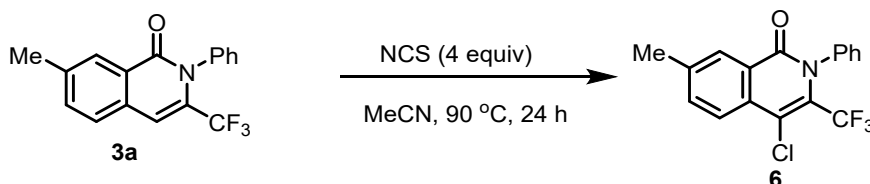

A dried 10 mL Schlenk tube was charged with **7-methyl-2-phenyl-3-(trifluoromethyl)isoquinolin-1(2H)-one 3a** (30.3 mg, 0.1 mmol, 1 equiv), *N*-Chlorosuccinimide (53.4 mg, 0.4 mmol, 4 equiv), and CH<sub>3</sub>CN (0.4 mL). The reaction mixture was heated to 90 °C on a heating plate for 24 hours under vigorous stirring. Upon completion, the reaction mixture was cooled to room temperature, diluted with ethyl acetate, and filtered through a pad of celite. The filtrate was concentrated under vacuum, and the resulting residue was purified by preparative thin layer chromatography (PTLC) with ethyl acetate : hexane (1:20) to give the corresponding products.

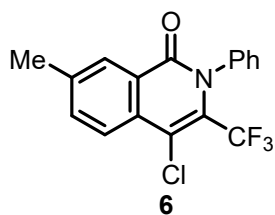

**4-chloro-7-methyl-2-phenyl-3-(trifluoromethyl)isoquinolin-1(2H)-one (6)** (10.4 mg, 31%) was prepared from typical procedure (ethyl acetate: hexane = 1 : 10) as brown solid. <sup>1</sup>H NMR (500 MHz, Chloroform-*d*) δ 8.24 (s, 1H), 8.11 (d, *J* = 8.3 Hz, 1H), 7.69 (dd, *J* = 8.3, 1.9 Hz, 1H), 7.52 – 7.44 (m, 3H), 7.28 (d, *J* = 7.2 Hz, 2H), 2.54 (s, 3H); <sup>13</sup>C NMR (126 MHz, Chloroform-*d*) δ 161.5, 141.3, 138.7, 135.2, 131.4, 128.9, 128.8, 128.7 (d, *J* = 1.8 Hz), 128.4, 127.0 (q, *J* = 31.4 Hz), 126.5, 125.4, 120.5 (q, *J* = 277.2 Hz), 116.5 (q, *J* = 2.3 Hz), 21.5; HRMS (ESI-TOF) *m/z*: calcd for C<sub>17</sub>H<sub>12</sub>ClF<sub>3</sub>NO<sup>+</sup>: 338.0554 (M + H)<sup>+</sup>, found: 338.0550. m.p. 151-153 °C. IR (KBr): ν = 3083, 3064, 2923, 1672, 1585, 1488, 1295, 843, 739 cm<sup>-1</sup>.

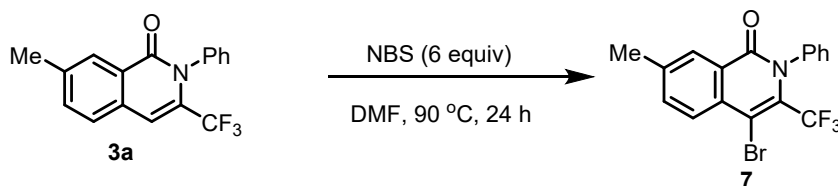

A dried 10 mL Schlenk tube was charged with **7-methyl-2-phenyl-3-(trifluoromethyl)isoquinolin-1(2H)-one 3a** (30.3 mg, 0.1 mmol, 1 equiv), *N*-Bromosuccinimide (106.8 mg, 0.6 mmol, 6 equiv), and DMF (0.5 mL). The reaction mixture was heated to 90 °C on a heating plate for 24 hours under vigorous stirring. Upon completion, the reaction mixture was cooled to room temperature, diluted with ethyl acetate, and filtered through a pad of celite. The filtrate was concentrated under vacuum, and the resulting residue was purified by preparative thin layer chromatography (PTLC) with ethyl acetate : hexane (1:20) to give the corresponding products.

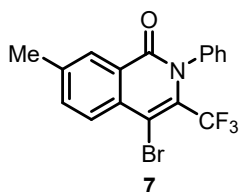

**4-bromo-7-methyl-2-phenyl-3-(trifluoromethyl)isoquinolin-1(2H)-one (7)** (17.4 mg, 46%) was prepared from typical procedure (ethyl acetate: hexane = 1 : 10) as white solid. <sup>1</sup>H NMR (500 MHz, Chloroform-*d*) δ 8.23 (s, 1H), 8.16 (d, *J* = 8.4 Hz, 1H), 7.67 (dd, *J* = 8.4, 1.8 Hz, 1H), 7.52 – 7.43 (m, 3H), 7.28 (d, *J* = 7.4 Hz, 2H), 2.54 (s, 3H); <sup>13</sup>C NMR (126 MHz, Chloroform-*d*) δ 161.7, 141.2, 139.0, 135.3, 132.4, 128.9, 128.8, 128.6 (q, *J* = 31.4 Hz), 128.5 (d, *J* = 1.7 Hz), 128.4, 128.3, 126.5, 120.4 (q, *J* = 277.6 Hz), 105.8 (q, *J* = 2.8 Hz), 21.4; HRMS (ESI-TOF) *m/z*: calcd for C<sub>17</sub>H<sub>12</sub>BrF<sub>3</sub>NO<sup>+</sup>: 382.0049 (M + H)<sup>+</sup>, found: 382.0050. m.p. 170-171 °C. IR (KBr): ν = 3067, 3042, 2919, 1676, 1577, 1486, 1290, 818, 672 cm<sup>-1</sup>.

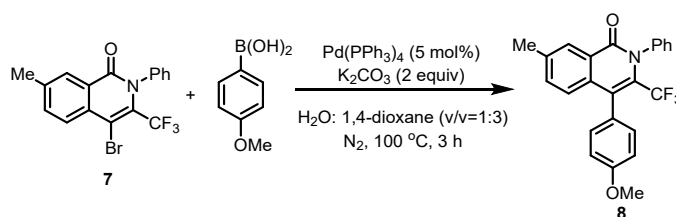



A dried 10 mL Schlenk tube was charged with **4-bromo-7-methyl-2-phenyl-3-(trifluoromethyl)isoquinolin-1(2H)-one (7)** (38.2 mg, 0.1 mmol, 1 equiv), (4-methoxyphenyl)boronic acid (22.8 mg, 0.15 mmol, 1.5 equiv), Pd(PPh<sub>3</sub>)<sub>4</sub> (5.8 mg, 5 mol%), K<sub>2</sub>CO<sub>3</sub> (27.6 mg, 0.2 mmol, 2 equiv), and dissolved in 1 mL mixture of water and 1,4-dioxane (1:3). The reaction mixture was heated to 100 °C on a heating plate for 3 hours under N<sub>2</sub>. Upon completion, the reaction mixture was cooled to room temperature, diluted with ethyl acetate, and filtered through a pad of celite. The filtrate was concentrated under vacuum, and the resulting residue was purified by preparative thin layer chromatography (PTLC) with ethyl acetate : hexane (1:4) to give the corresponding products.

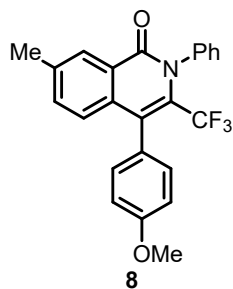

**4-(4-methoxyphenyl)-7-methyl-2-phenyl-3-(trifluoromethyl)isoquinolin-1(2H)-one (8)** (23.4 mg, 57%) was prepared from typical procedure (ethyl acetate: hexane = 1 : 4) as white solid. <sup>1</sup>H NMR (500 MHz, Chloroform-*d*) δ 8.28 (s, 1H), 7.53 – 7.45 (m, 3H), 7.43 (dd, *J* = 8.4, 1.9 Hz, 1H), 7.36 (d, *J* = 7.7 Hz, 2H), 7.25 – 7.21 (m, 2H), 7.08 – 6.98 (m, 3H), 3.89 (s, 3H), 2.50 (s, 3H); <sup>13</sup>C NMR (126 MHz, Chloroform-*d*) δ 162.4, 159.4, 139.9, 138.6, 134.6, 134.3, 131.0 (d, *J* = 2.2 Hz), 129.4 (d, *J* = 1.8 Hz), 128.7, 128.7, 127.9, 127.4, 127.0, 126.8 (q, *J* = 29.5 Hz), 126.5, 122.5 (q, *J* = 3.1 Hz), 120.9 (q, *J* = 277.0 Hz), 113.8, 55.3, 21.4; HRMS (ESI-TOF) *m/z*: calcd for C<sub>24</sub>H<sub>19</sub>F<sub>3</sub>NO<sub>2</sub><sup>+</sup>: 410.1362 (M + H)<sup>+</sup>, found: 410.1363. m.p. 184-185 °C. IR (KBr): ν = 3066, 3043, 2962, 2920, 1663, 1591, 1509, 1320, 1038, 840 cm<sup>-1</sup>.

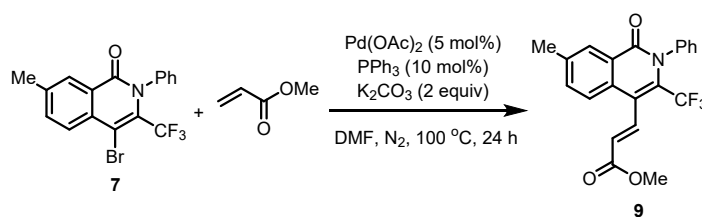

A dried 10 mL Schlenk tube was charged with **4-bromo-7-methyl-2-phenyl-3-(trifluoromethyl)isoquinolin-1(2H)-one (7)** (38.2 mg, 0.1 mmol, 1 equiv), methyl acrylate (17.2 mg, 0.2 mmol, 2 equiv), Pd(OAc)<sub>2</sub> (1.1 mg, 5 mol%), PPh<sub>3</sub> (2.6 mg, 10 mol%), K<sub>2</sub>CO<sub>3</sub> (27.6 mg, 0.2 mmol, 2 equiv), and DMF (1 mL). The reaction mixture was heated to 100 °C on a heating plate for 24 hours under N<sub>2</sub>. Upon completion, the reaction mixture was cooled to room temperature, diluted with ethyl acetate, and filtered through a pad of celite. The filtrate was concentrated under vacuum, and the resulting residue was purified by preparative thin layer chromatography (PTLC) with ethyl acetate : hexane (1:4) to give the corresponding products.

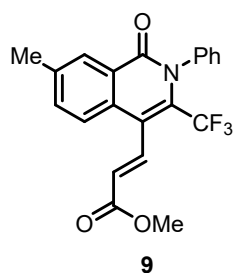

**methyl (*E*)-3-(7-methyl-1-oxo-2-phenyl-3-(trifluoromethyl)-1,2-dihydroisoquinolin-4-yl)acrylate (9)** (33.2 mg, 86%) was prepared from typical procedure (ethyl acetate: hexane = 1 : 4) as white solid.  $^1\text{H}$  NMR (500 MHz, Chloroform-*d*)  $\delta$  8.28 (s, 1H), 7.88 (dq,  $J = 16.2, 4.4$  Hz, 1H), 7.66 (d,  $J = 8.3$  Hz, 1H), 7.58 (dd,  $J = 8.4, 1.9$  Hz, 1H), 7.53 – 7.45 (m, 3H), 7.30 (d,  $J = 7.4$  Hz, 2H), 6.17 (d,  $J = 16.2$  Hz, 1H), 3.86 (s, 3H), 2.53 (s, 3H);  $^{13}\text{C}$  NMR (126 MHz, Chloroform-*d*)  $\delta$  165.9, 161.9, 140.5, 138.6, 137.9, 134.7, 131.6, 129.2 (d,  $J = 1.8$  Hz), 128.9, 128.8, 128.5, 127.0 (q,  $J = 3.3$  Hz), 126.6 (q,  $J = 30.7$  Hz), 126.5, 125.9, 120.7 (q,  $J = 276.7$  Hz), 116.6 (q,  $J = 2.5$  Hz), 52.0, 21.5; HRMS (ESI-TOF)  $m/z$ : calcd for  $\text{C}_{21}\text{H}_{17}\text{F}_3\text{NO}_3^+$ : 388.1155 ( $\text{M} + \text{H}^+$ ), found: 388.1150. m.p. 191-192 °C. IR (KBr):  $\nu = 3052, 2949, 2923, 1720, 1672, 1588, 1500, 1488, 1319, 1078, 879$   $\text{cm}^{-1}$ .

## Reference

- 1 (a) S. Wen, Q. Tian, Y. Chen, Y. Zhang and G. Cheng, Annulation of CF<sub>3</sub>-Imidoyl Sulfoxonium Ylides with 1,3-Dicarbonyl Compounds: Access to 1,2,3-Trisubstituted 5-Trifluoromethylpyrroles. *Org. Lett.*, 2021, **23**, 7407-7411; (b) S. Wen, Y. Chen, Q. Tian, Y. Zhang and G. Cheng, Transition-Metal-, Additive-, and Solvent-Free [3+3] Annulation of RCF<sub>2</sub>-Imidoyl Sulfoxonium Ylides with Cyclopropanones to Give Multifunctionalized CF<sub>3</sub>-Pyridones. *J. Org. Chem.* **2022**, *87*, 1124–1132.
- 2 K. Zhou, J. Geng, D. Wang, J. Zhang and Y. Zhao, An Indirect Strategy for Trifluoromethylation via an Iridium Catalyst: Approach to Generate Isocoumarin Skeletons in Bioactive Molecules. *Org. Lett.*, 2020, **22**, 5109-5114.

### 3. $^1\text{H}$ and $^{13}\text{C}$ NMR Spectra

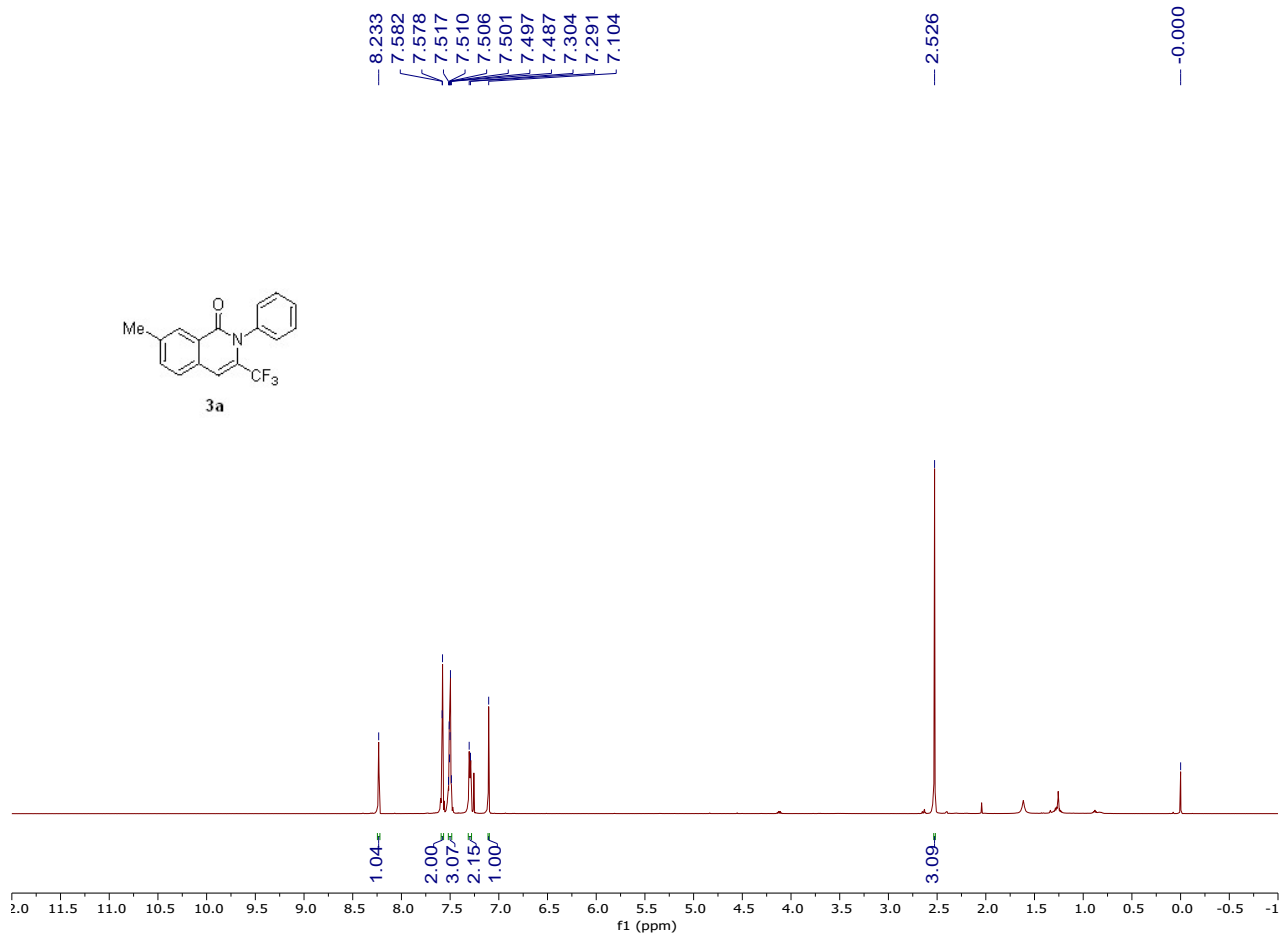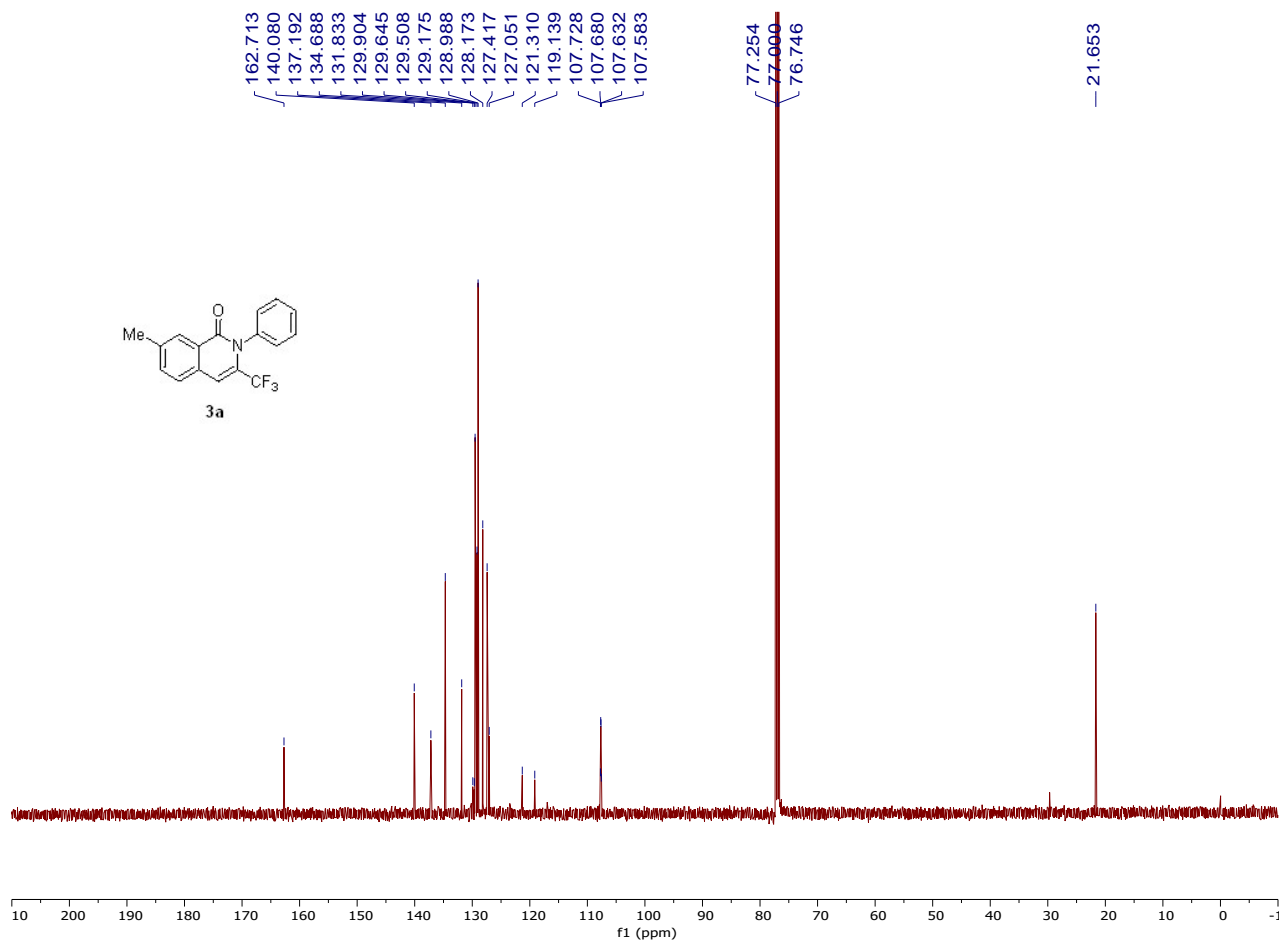

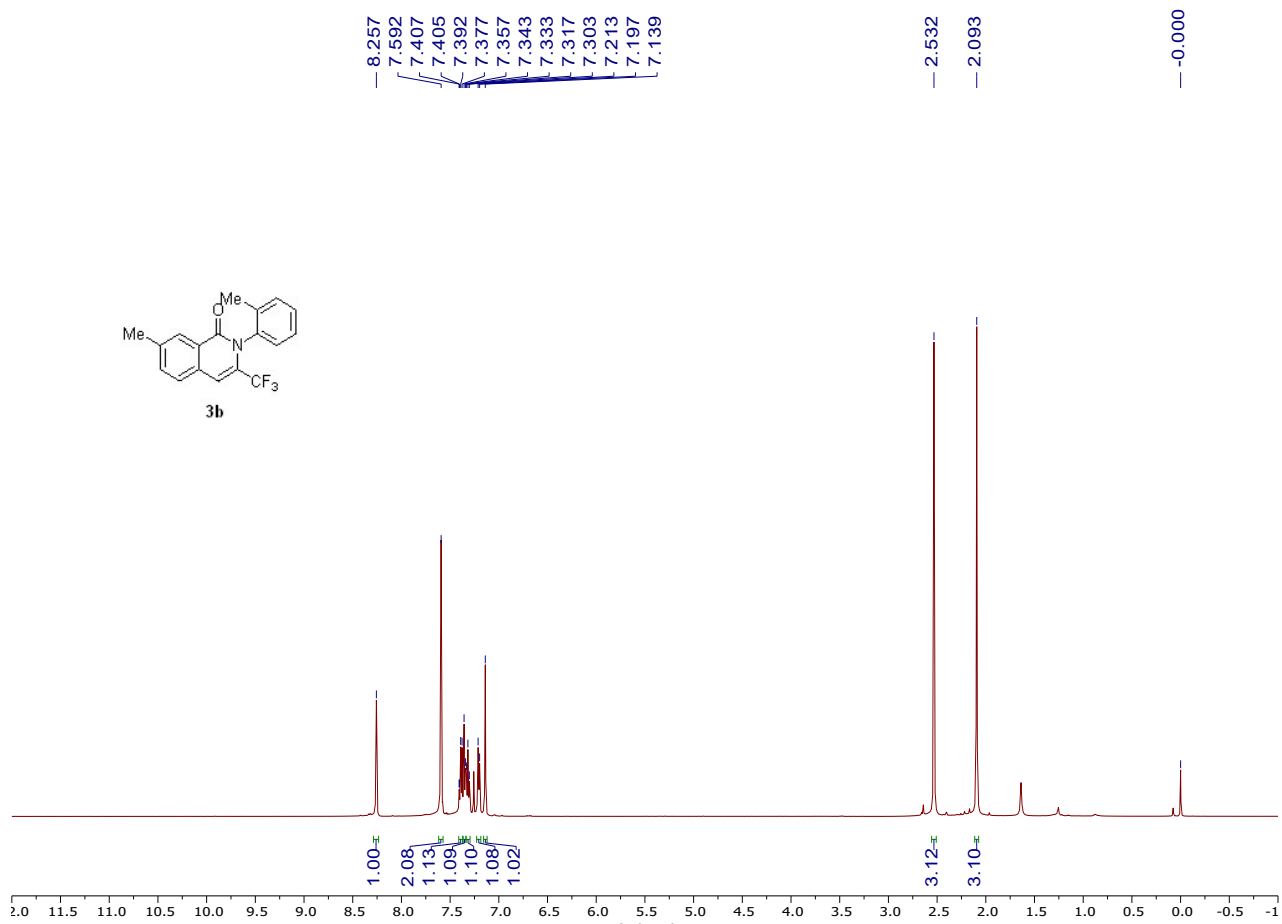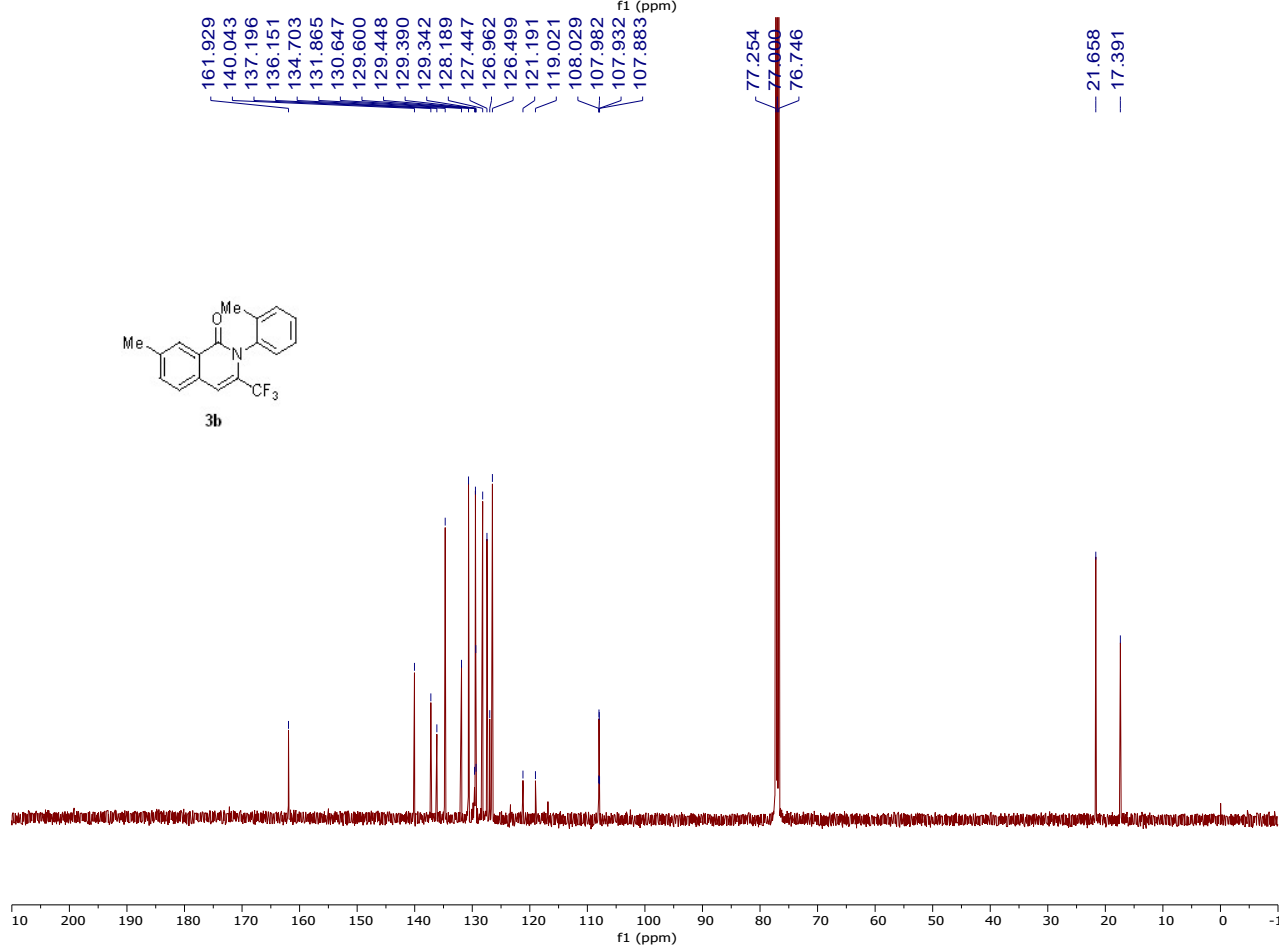

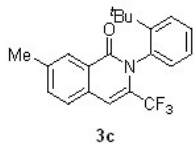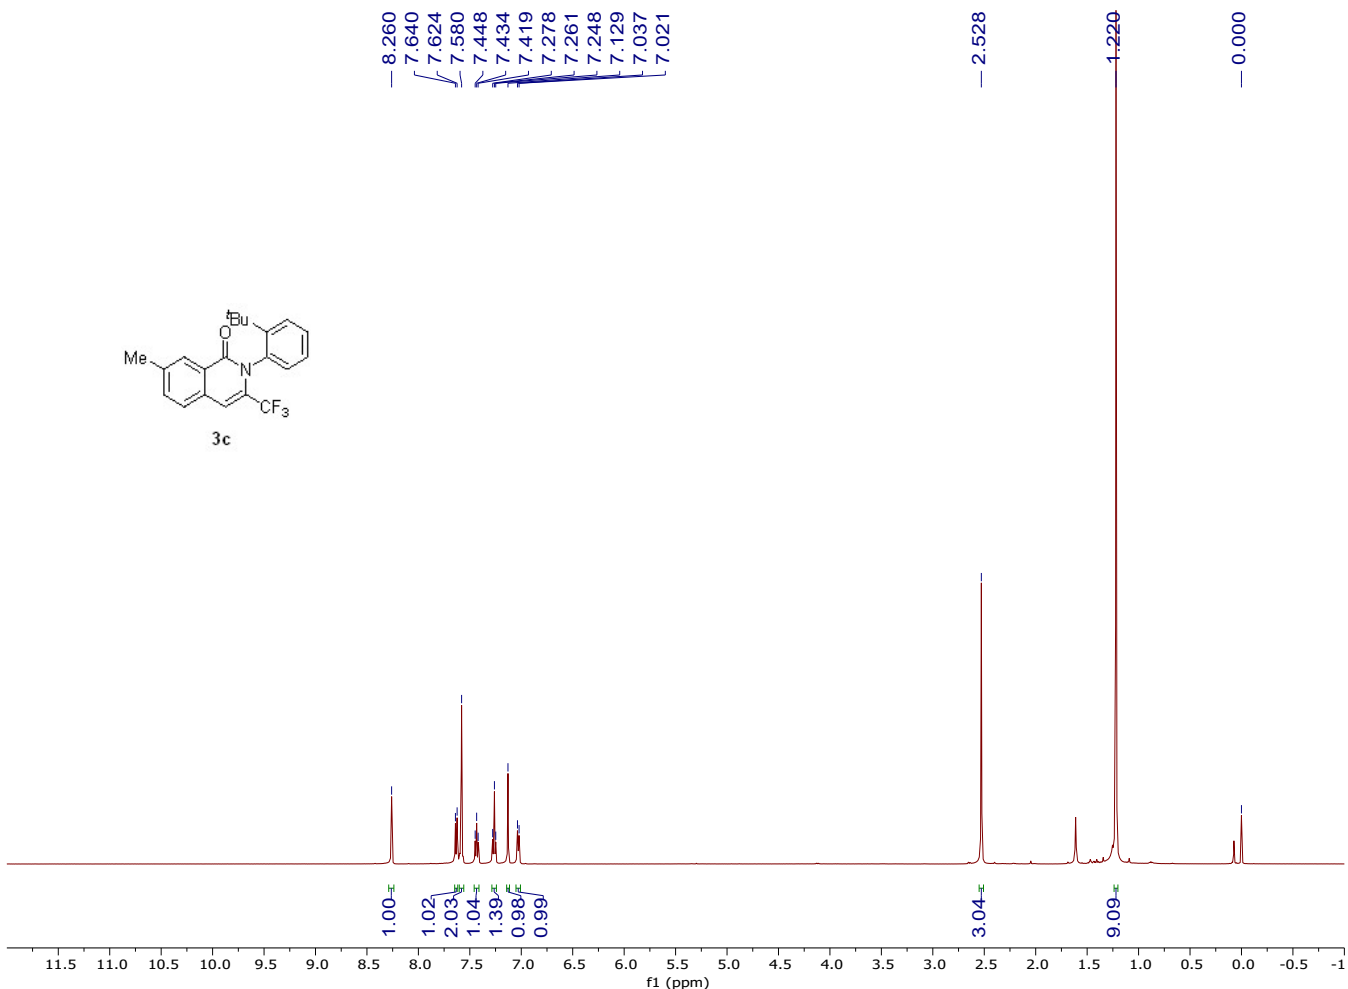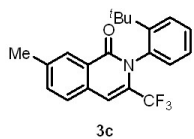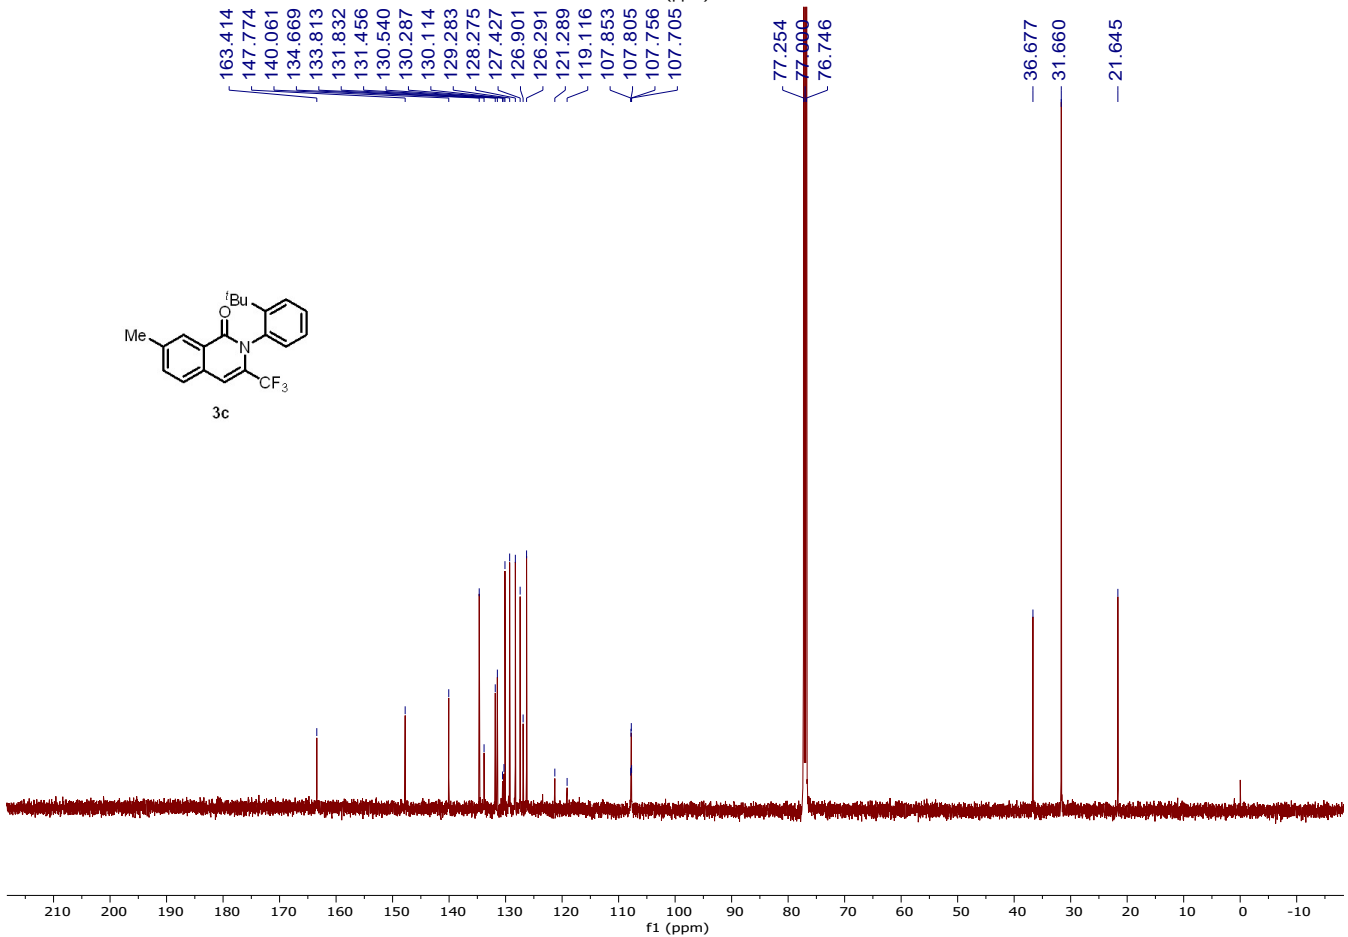

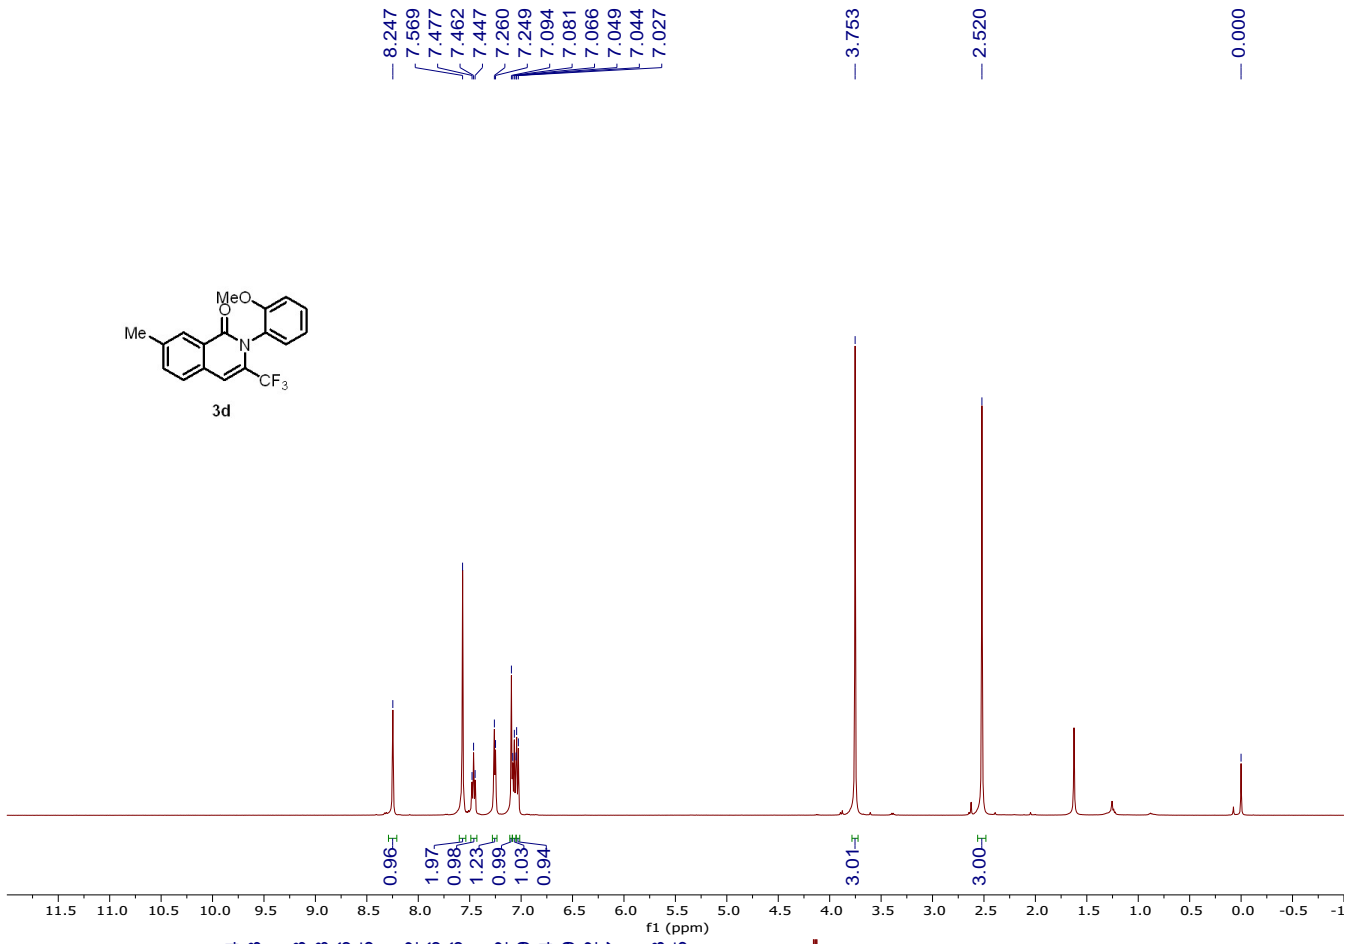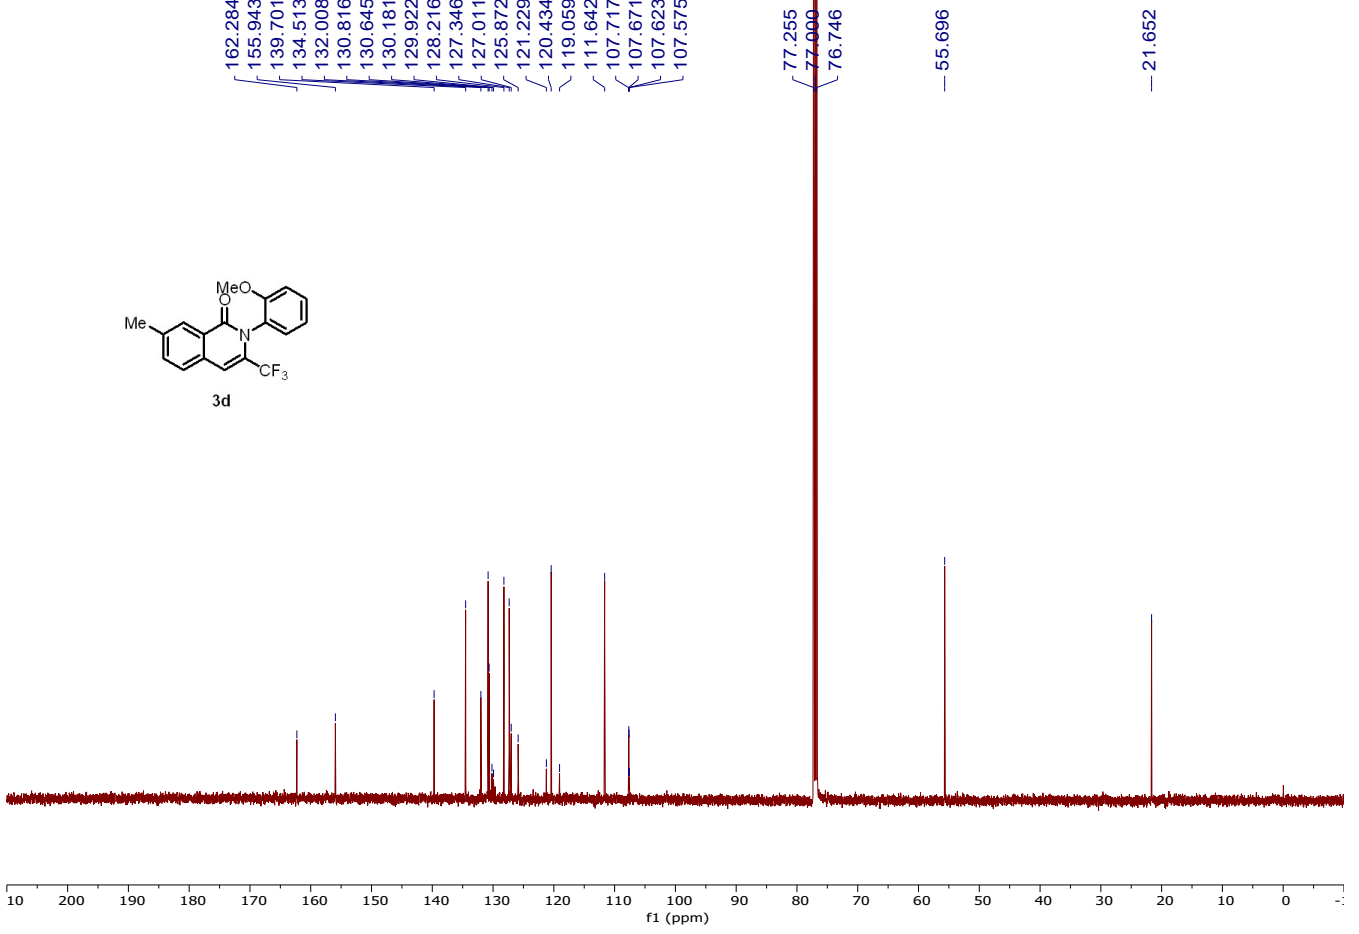

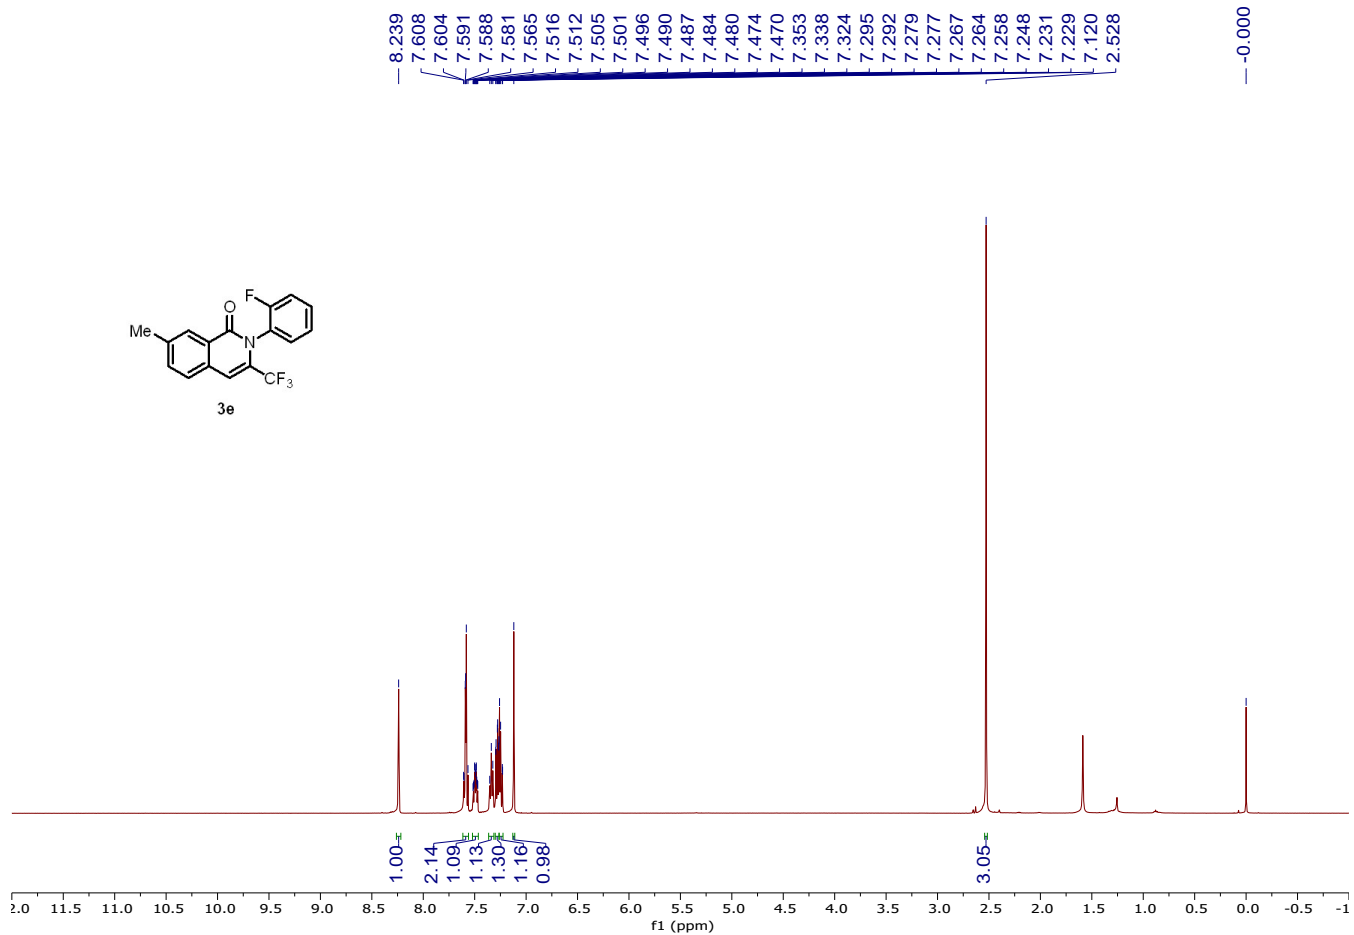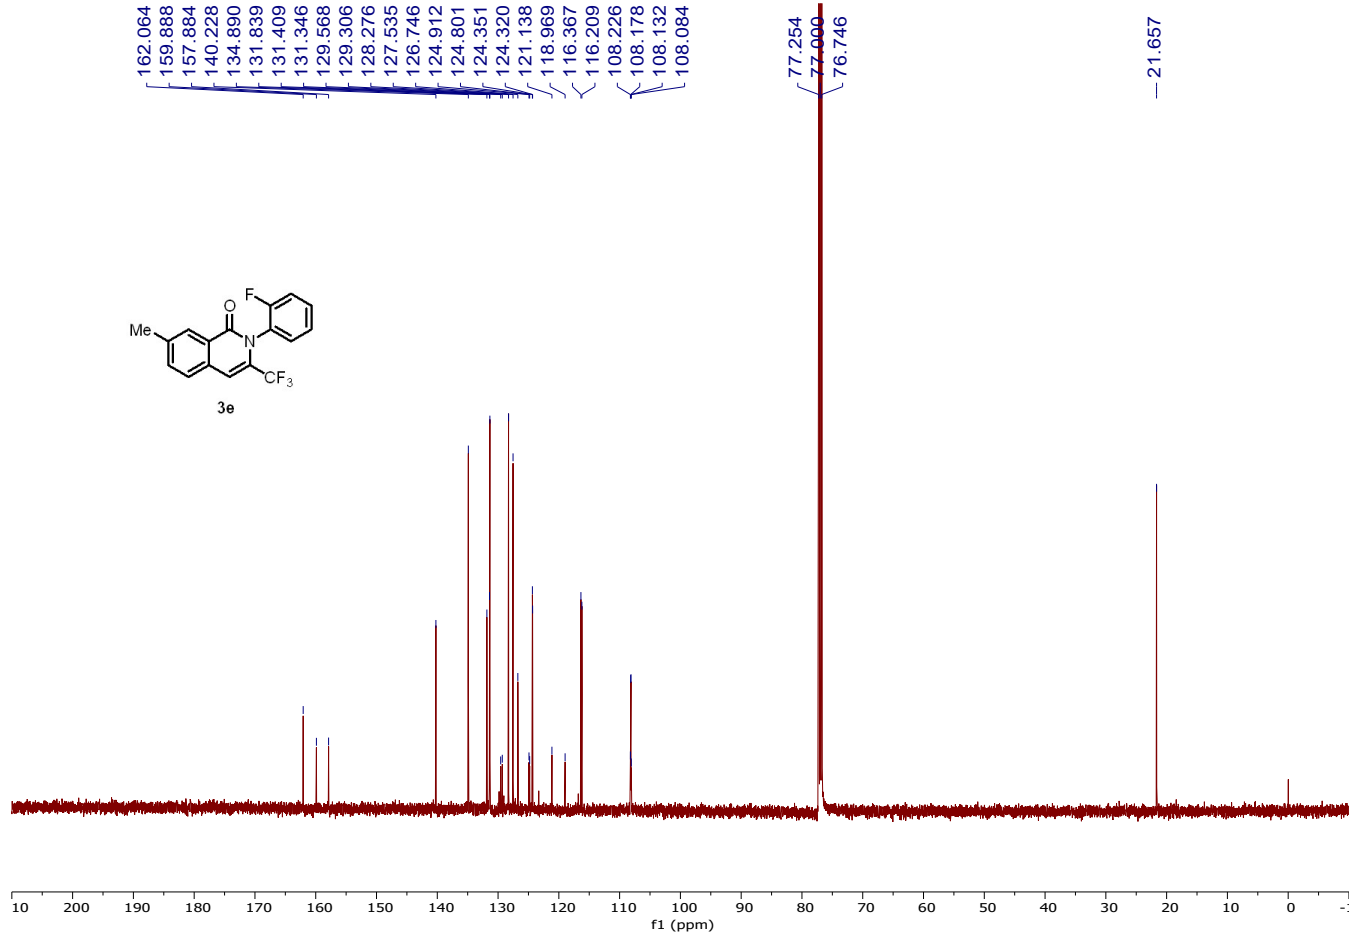



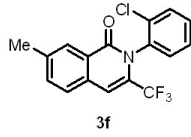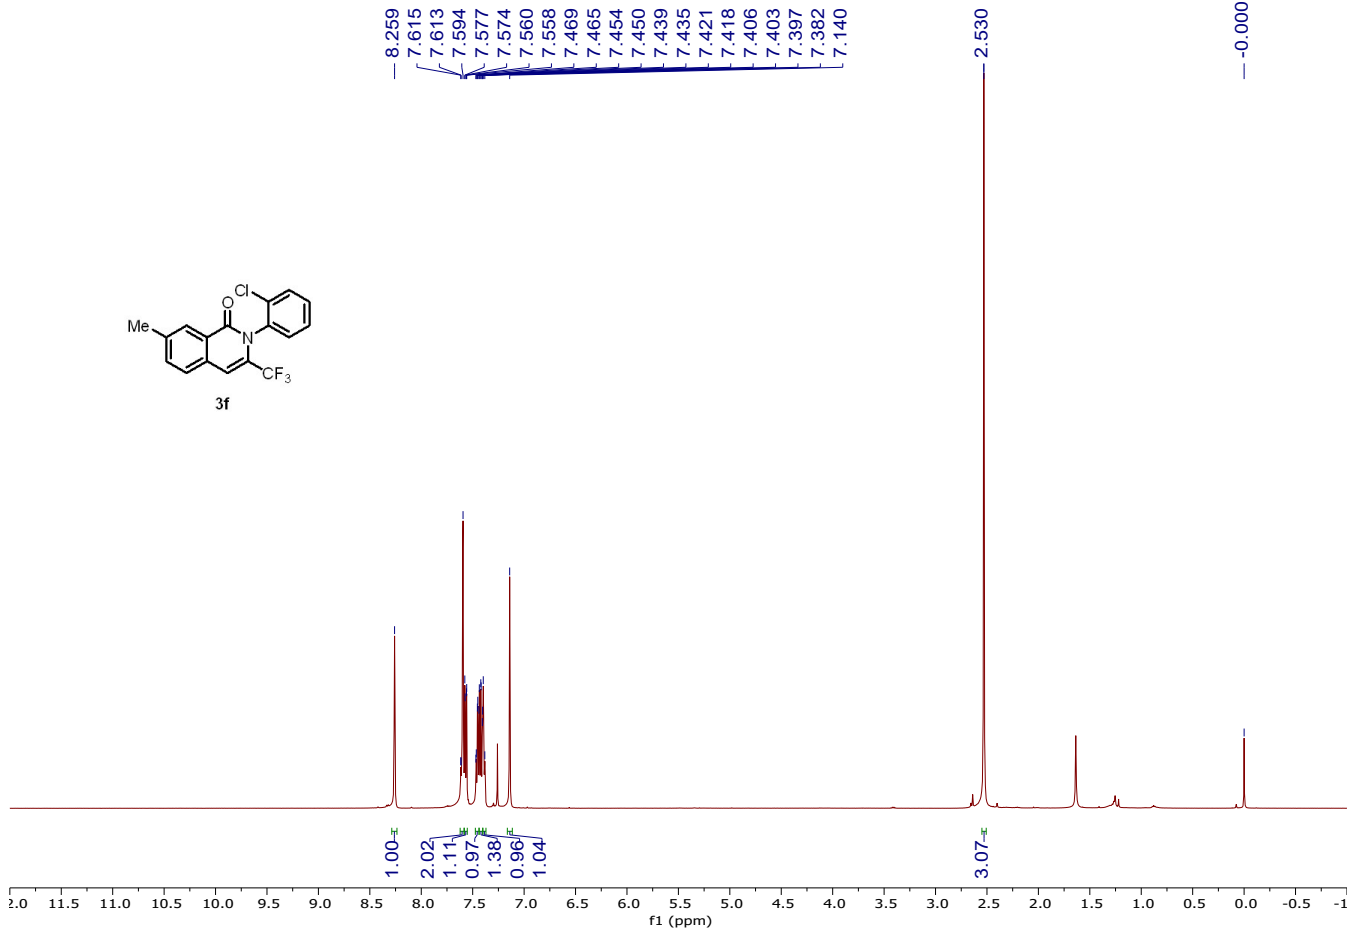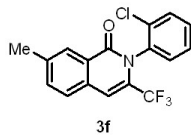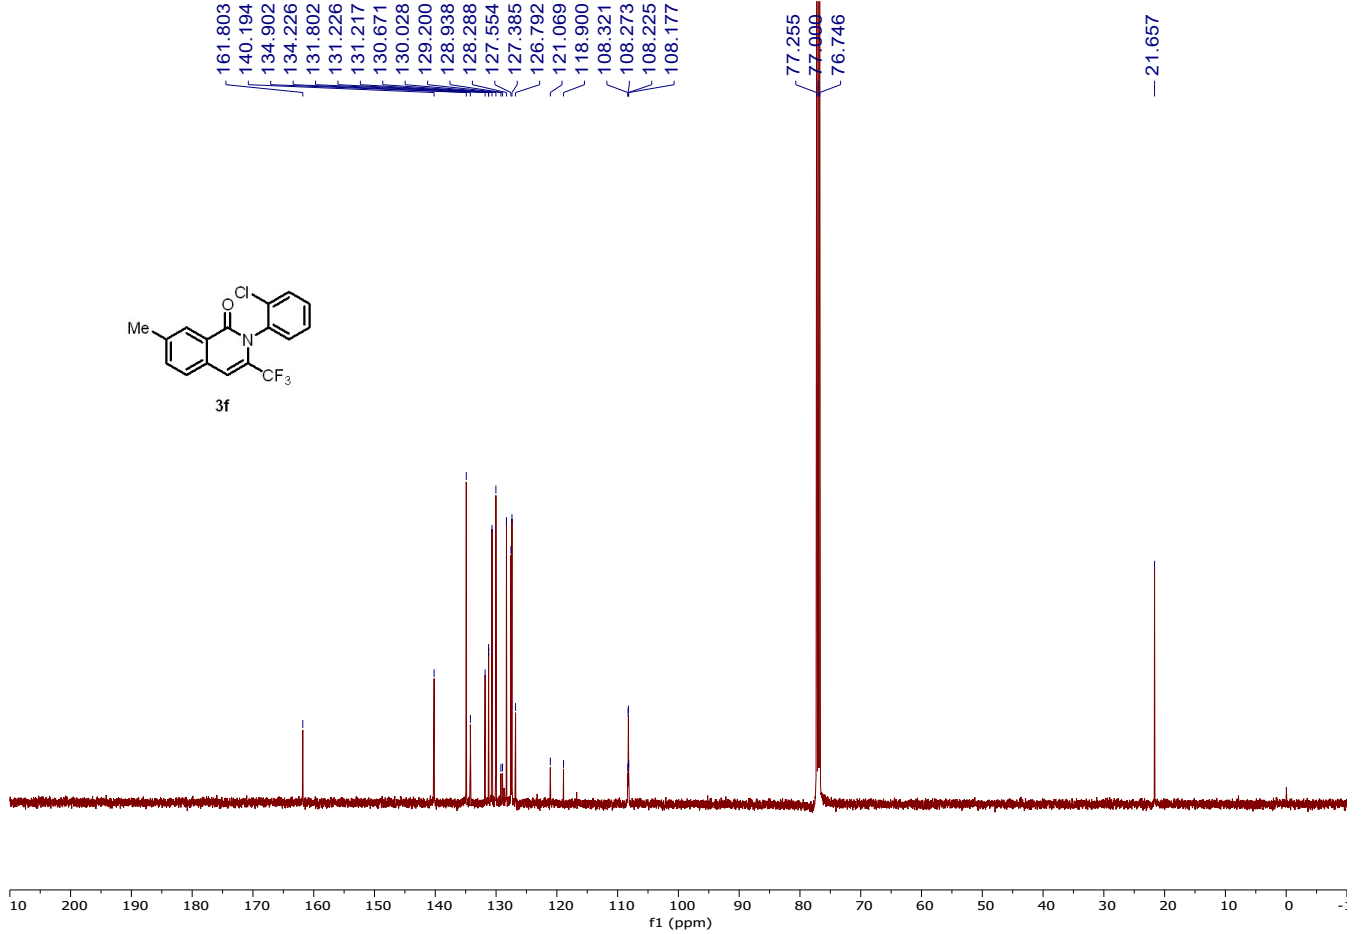

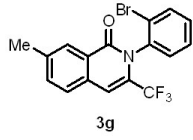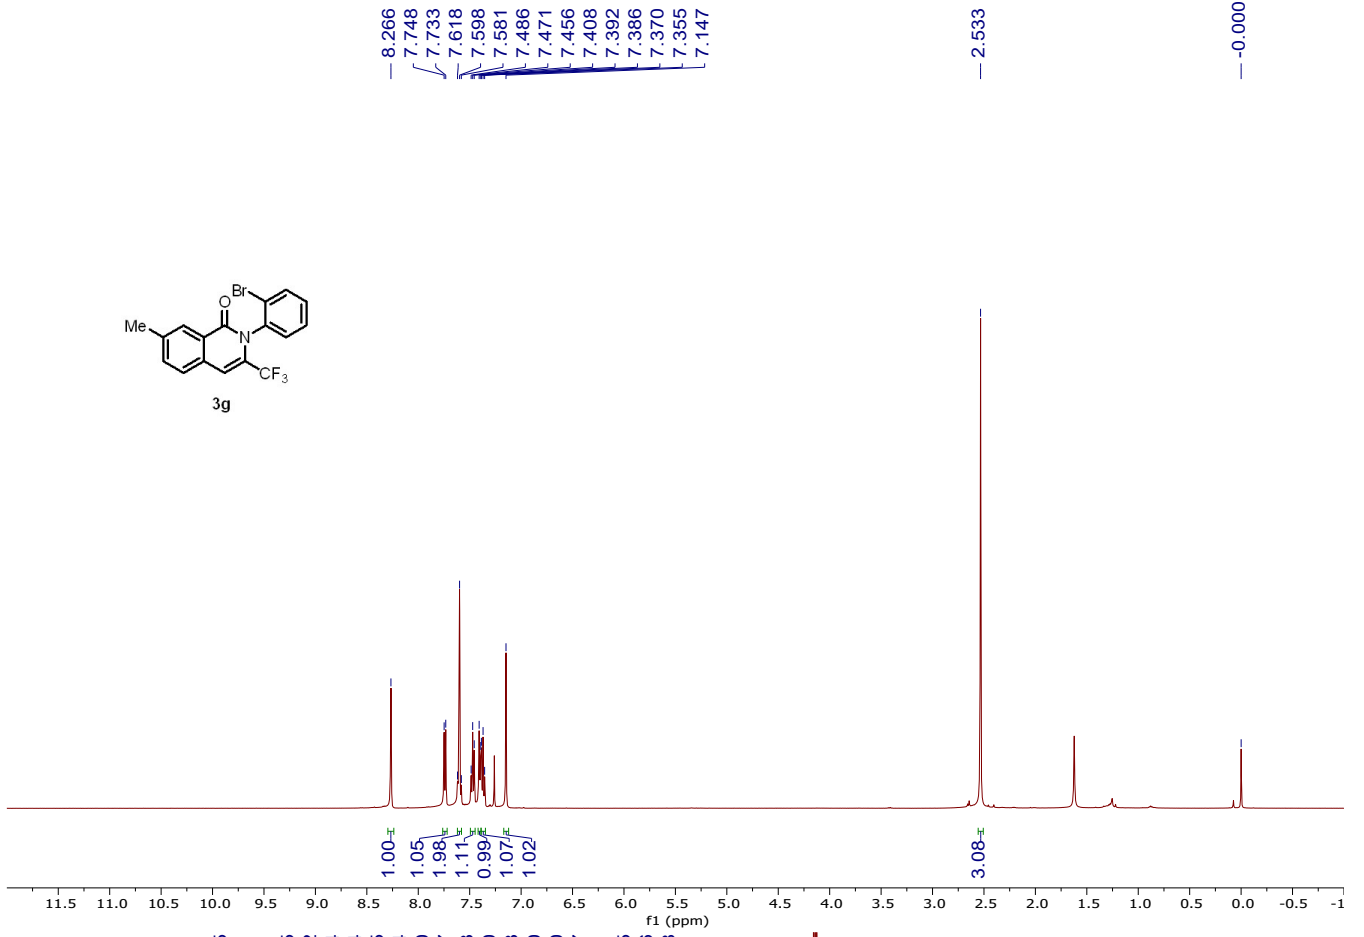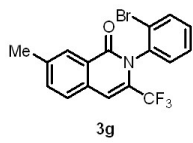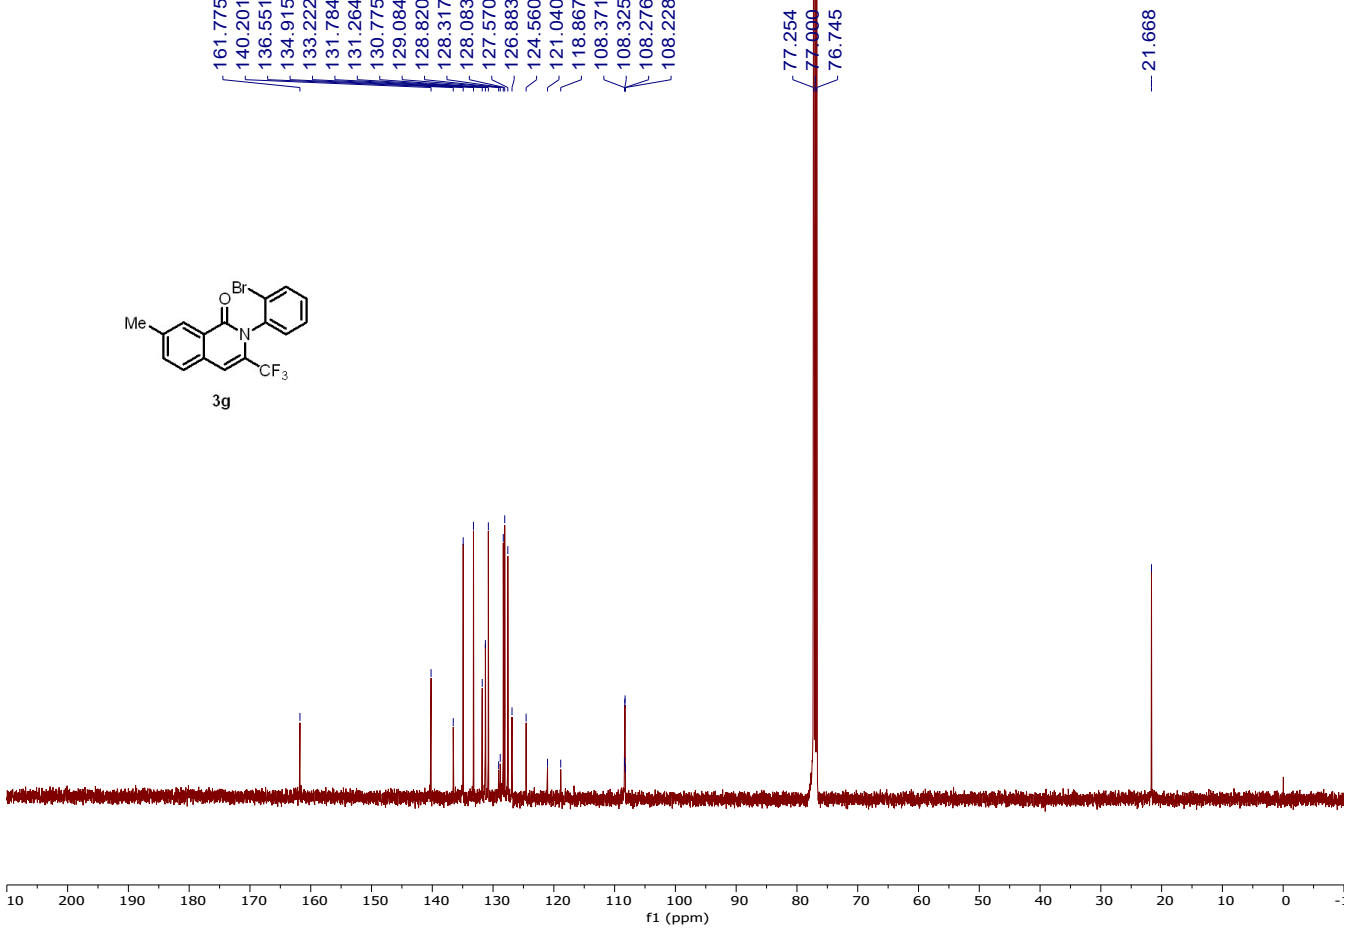

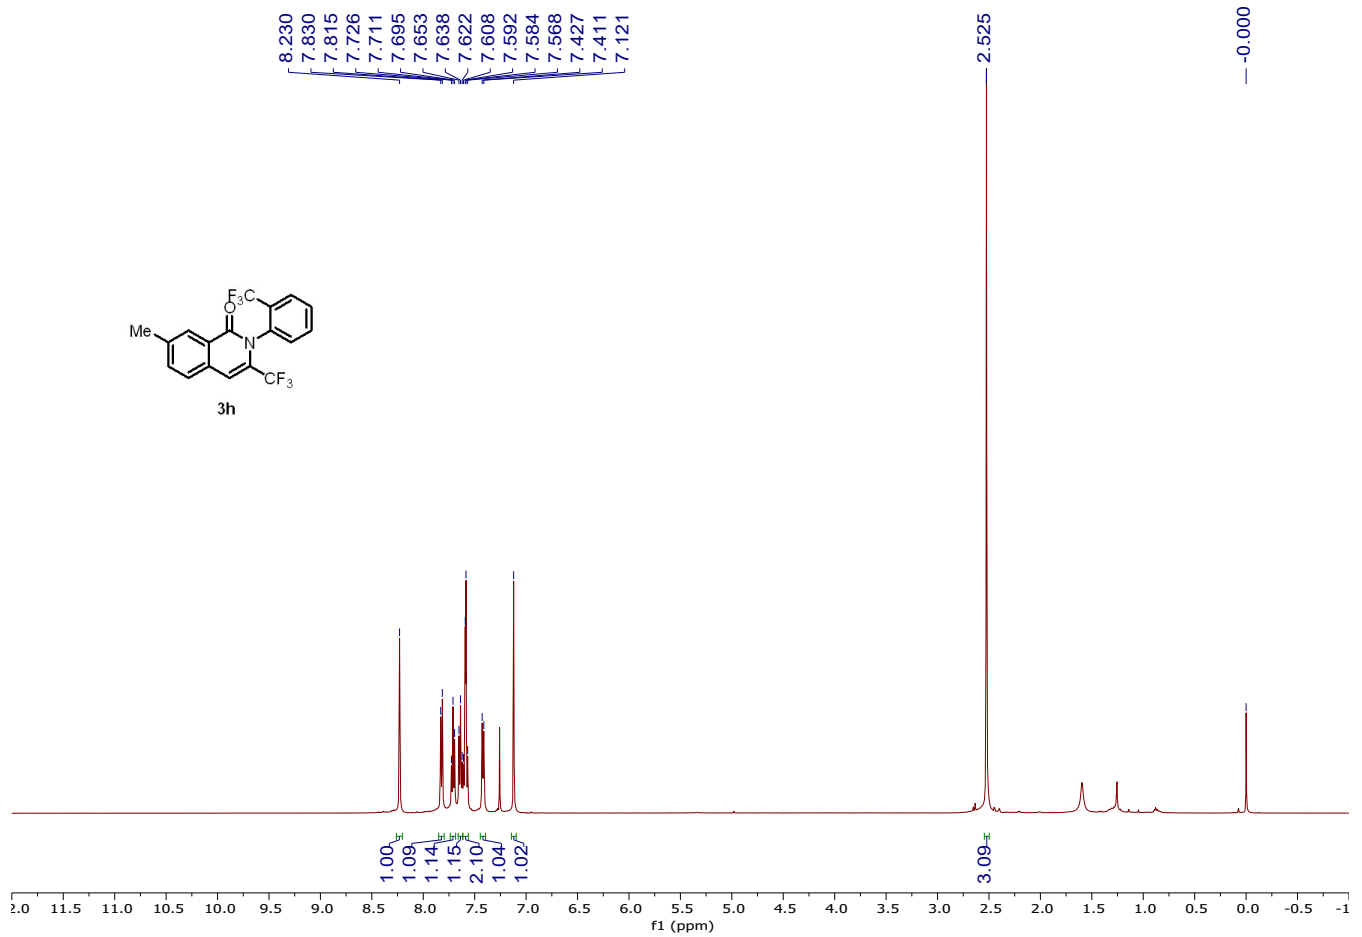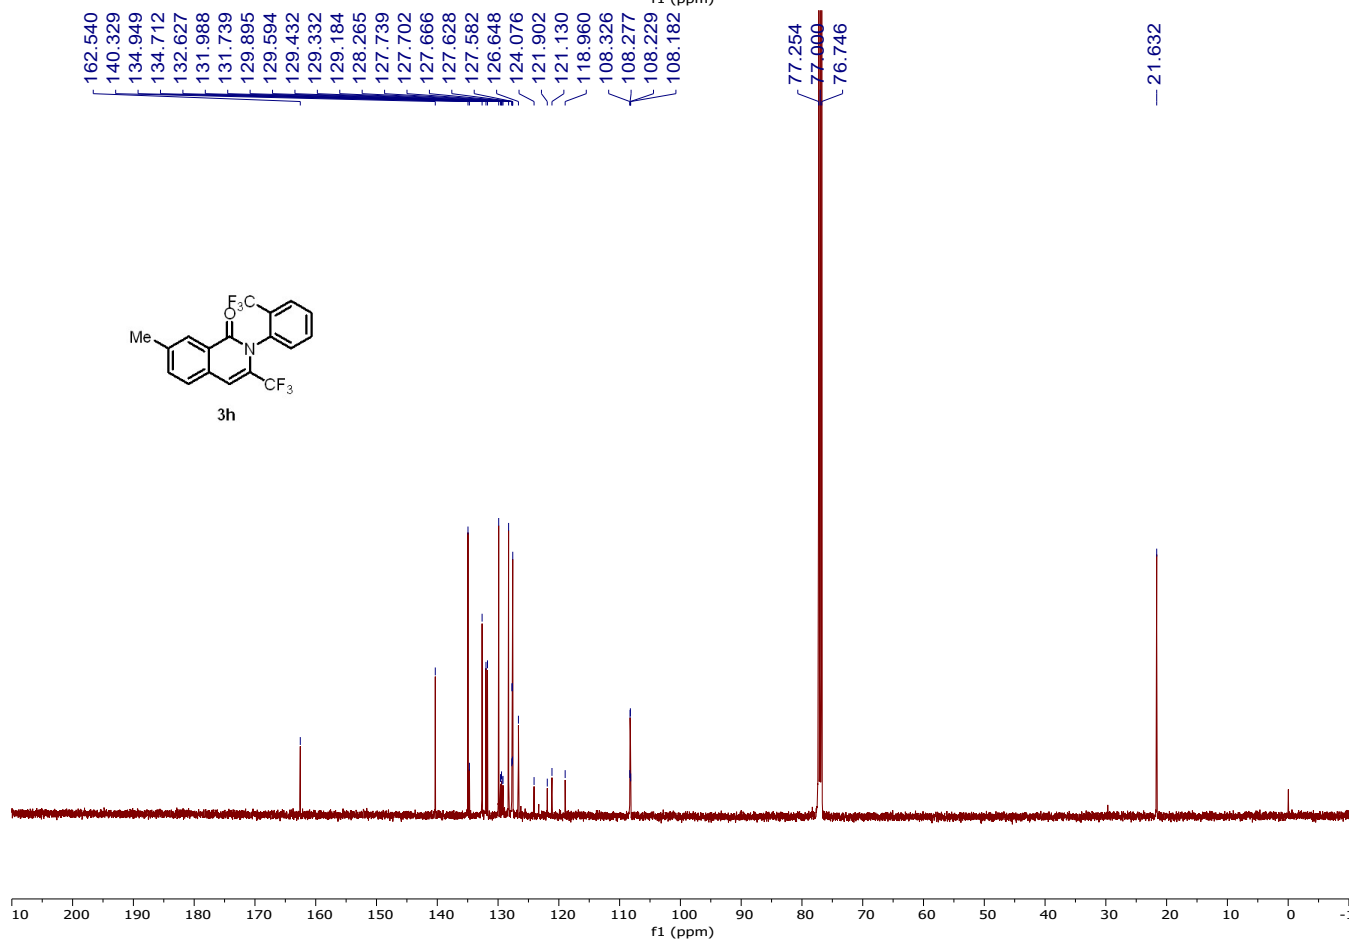

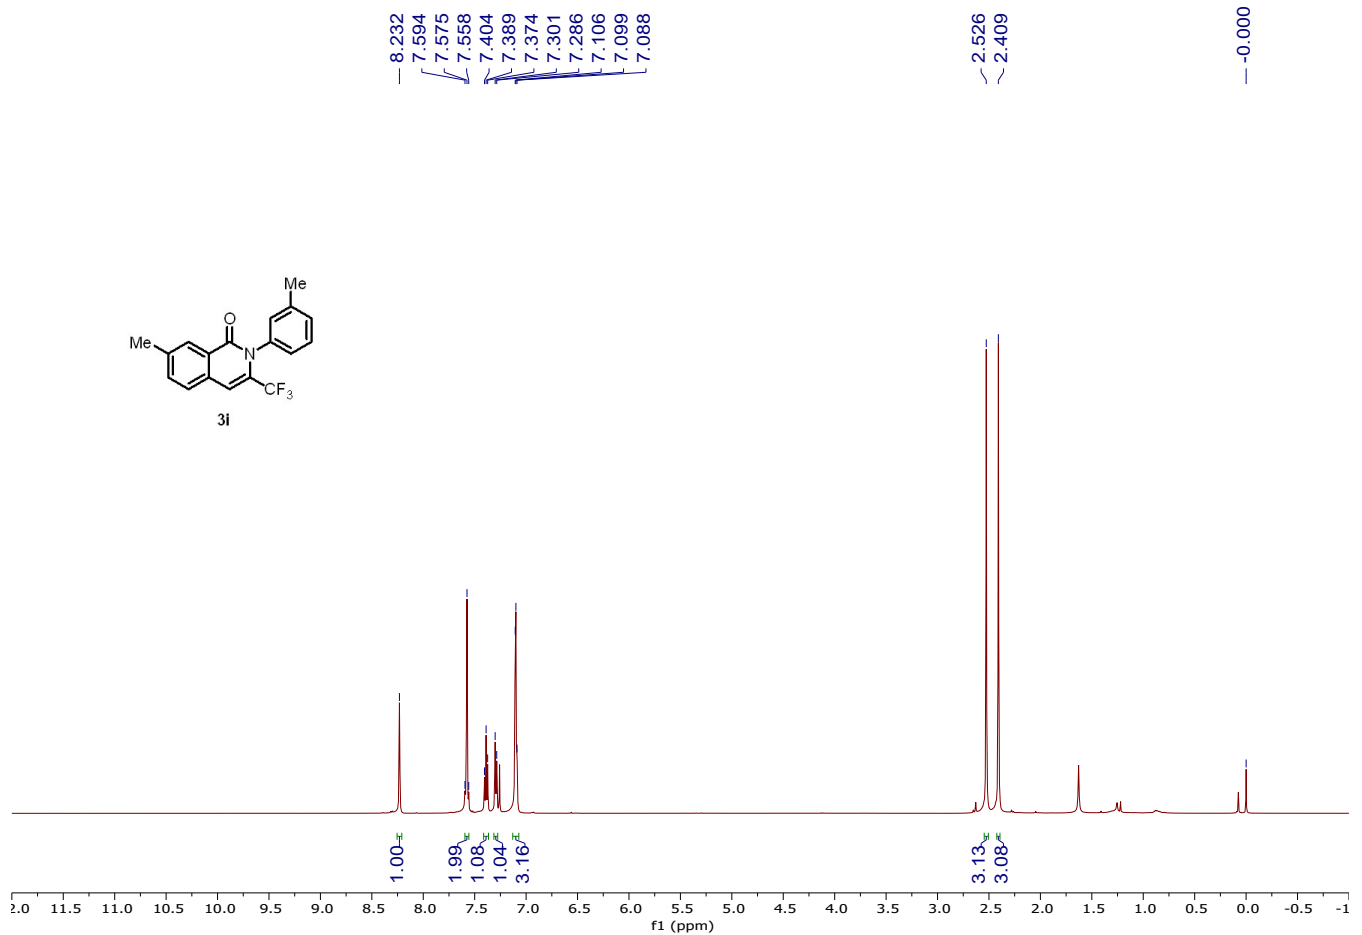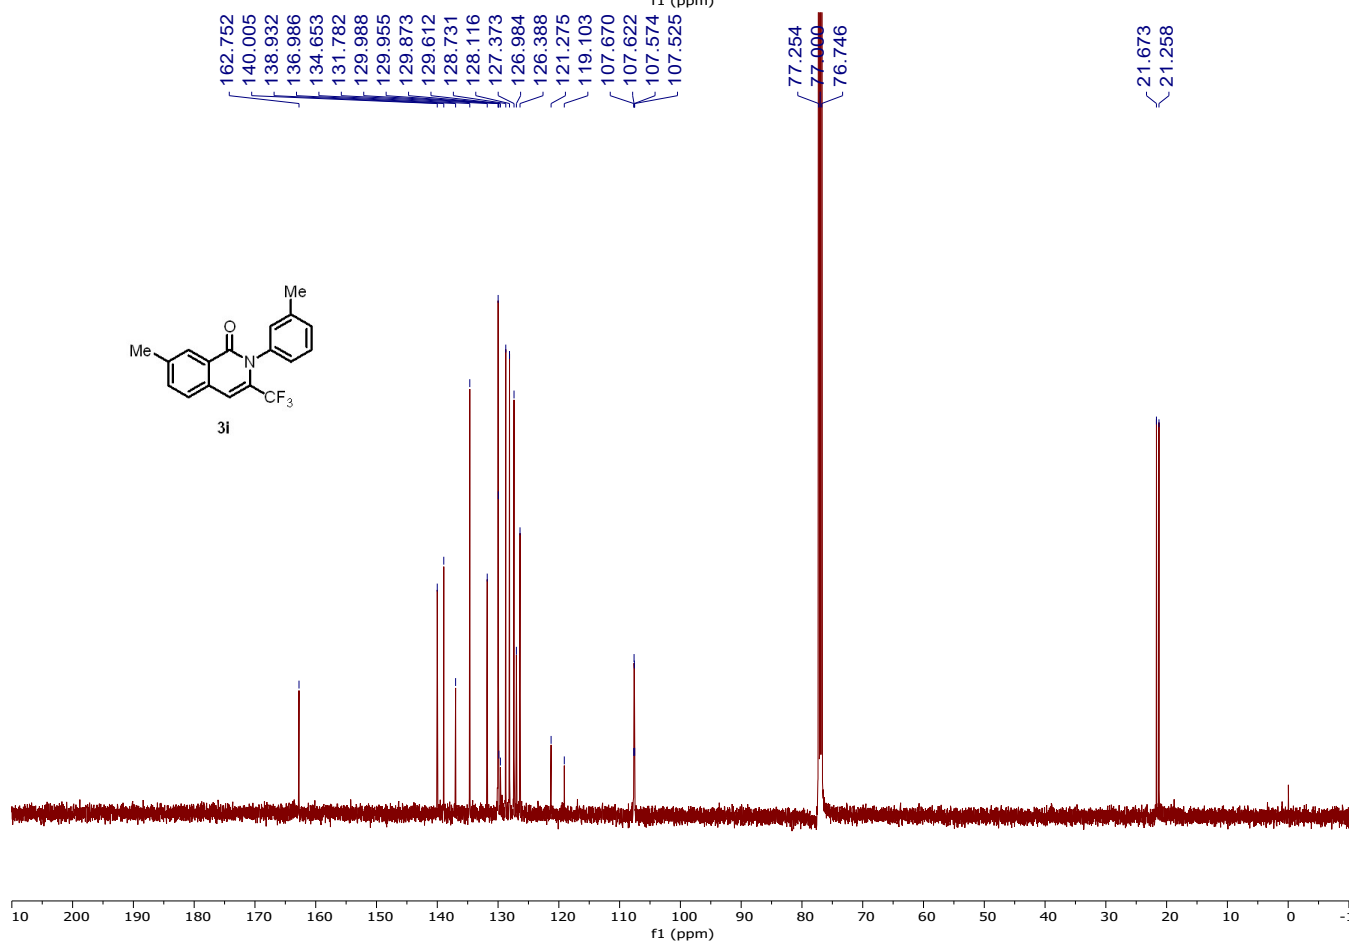

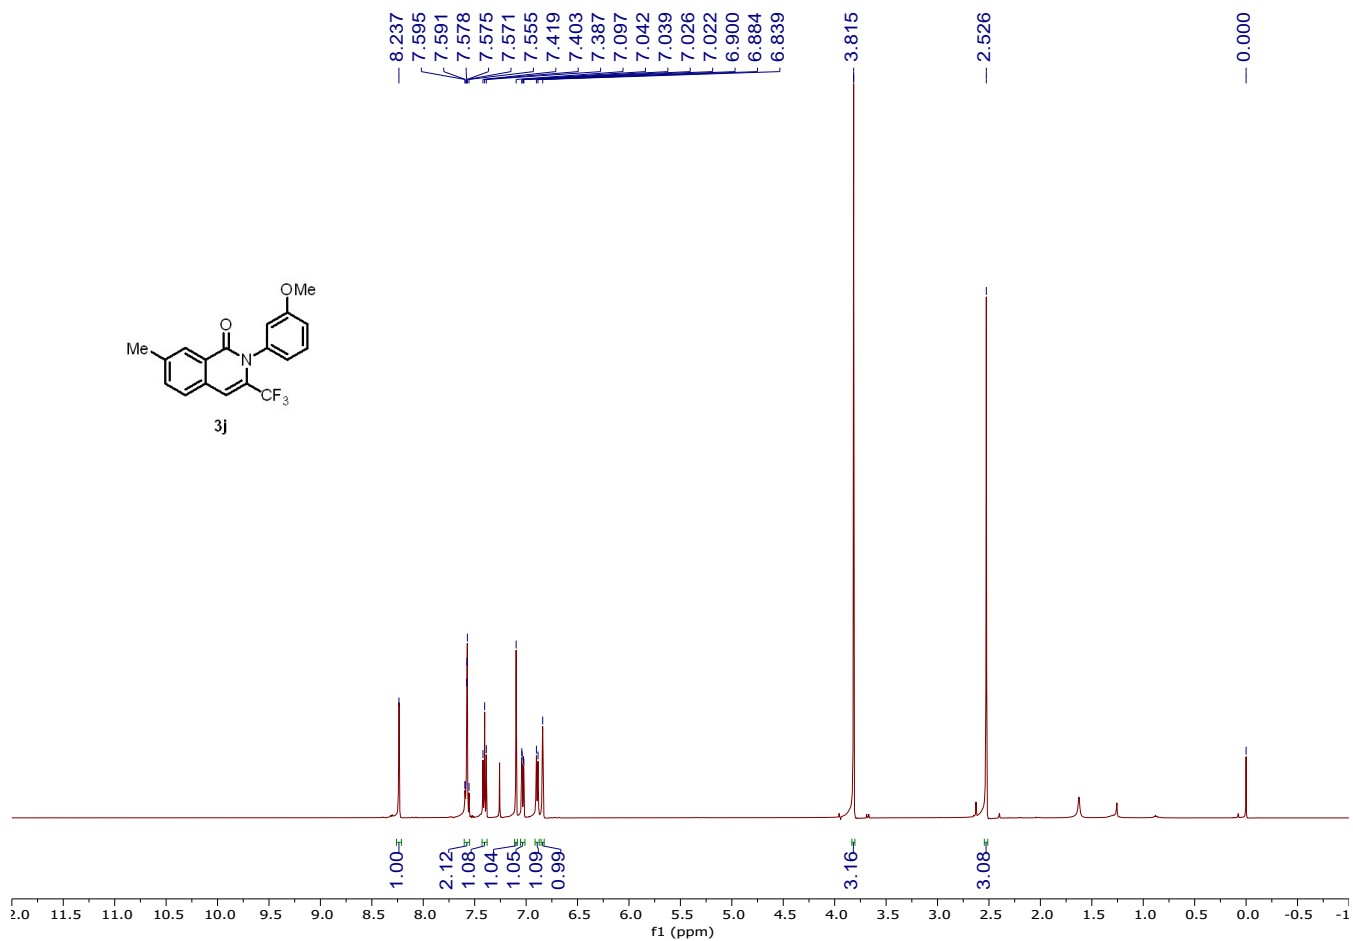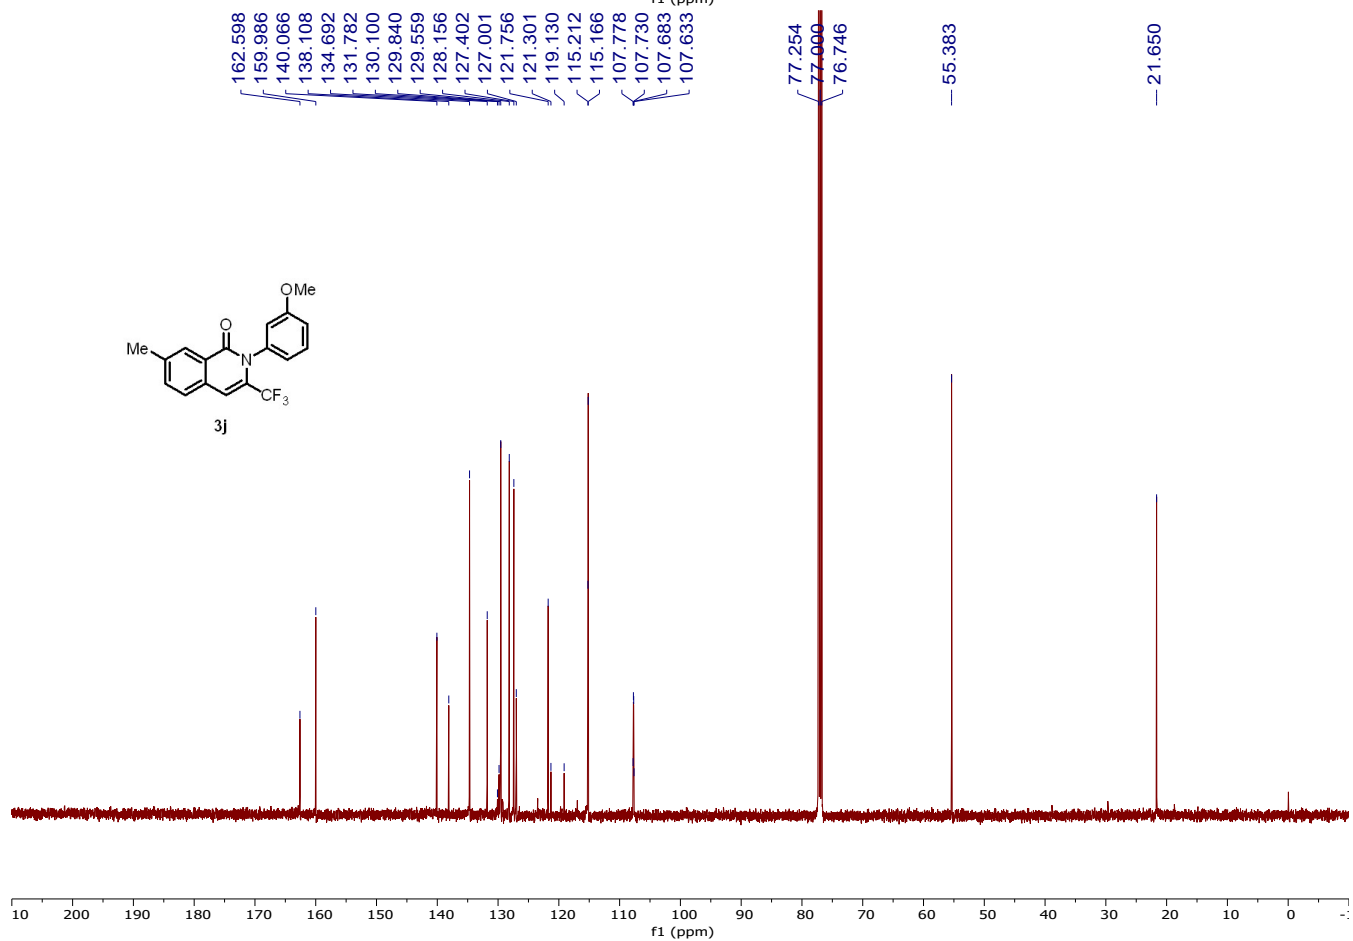

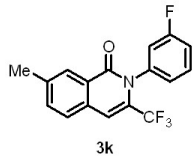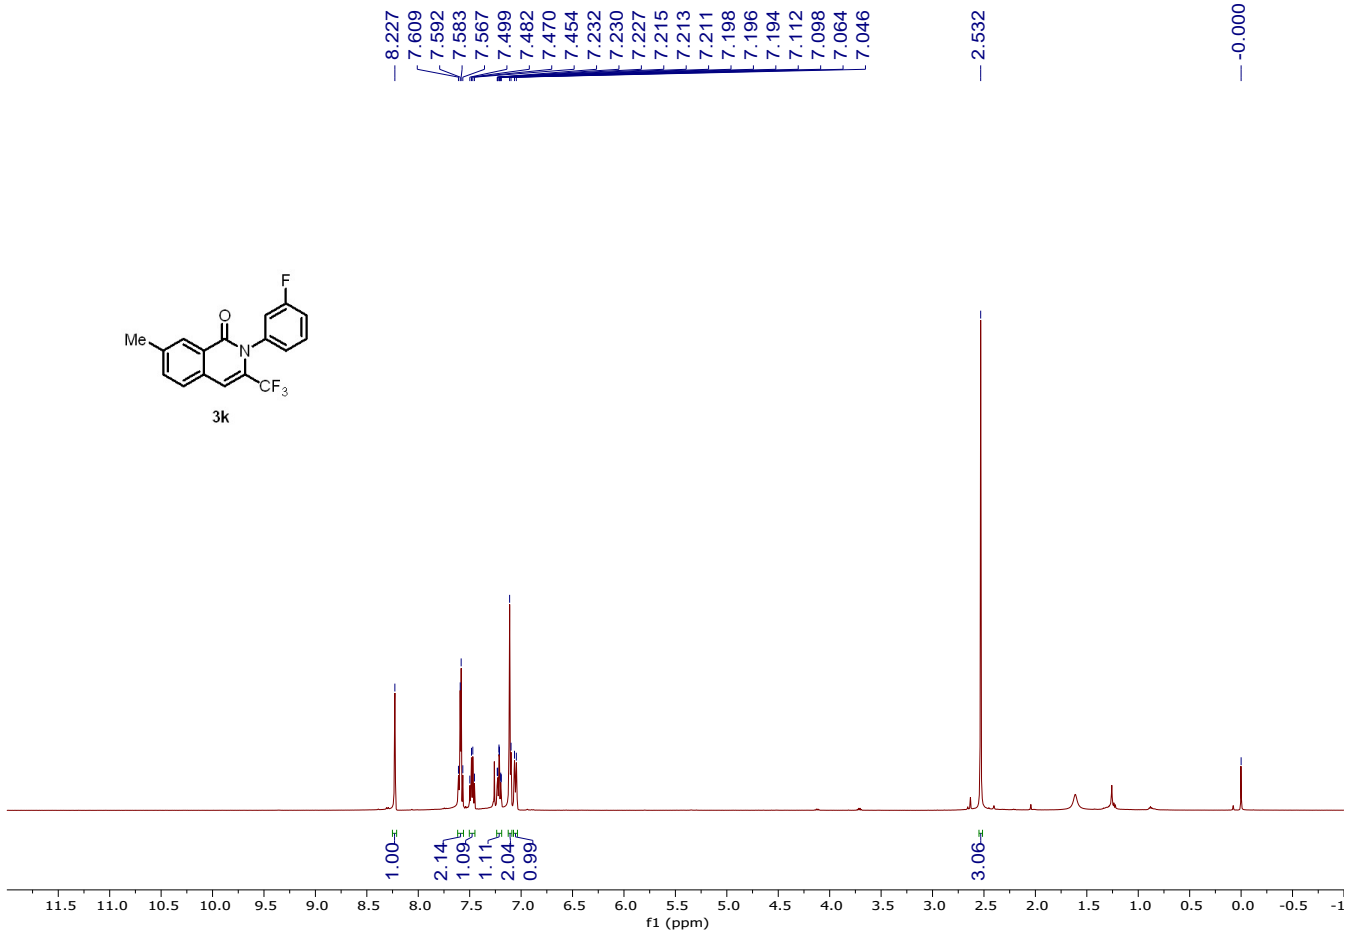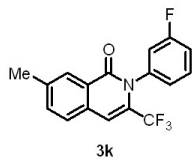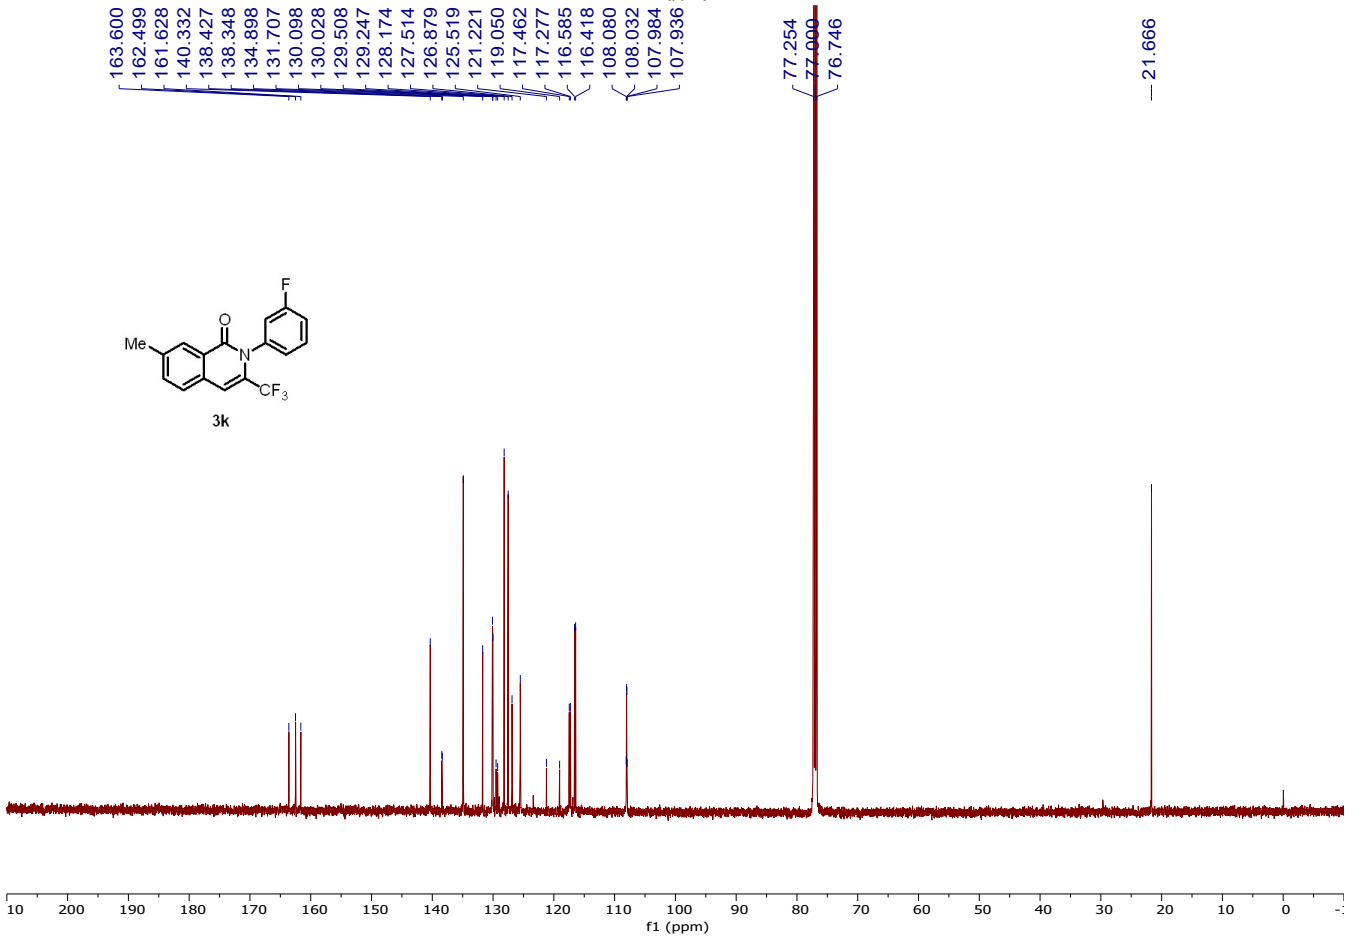

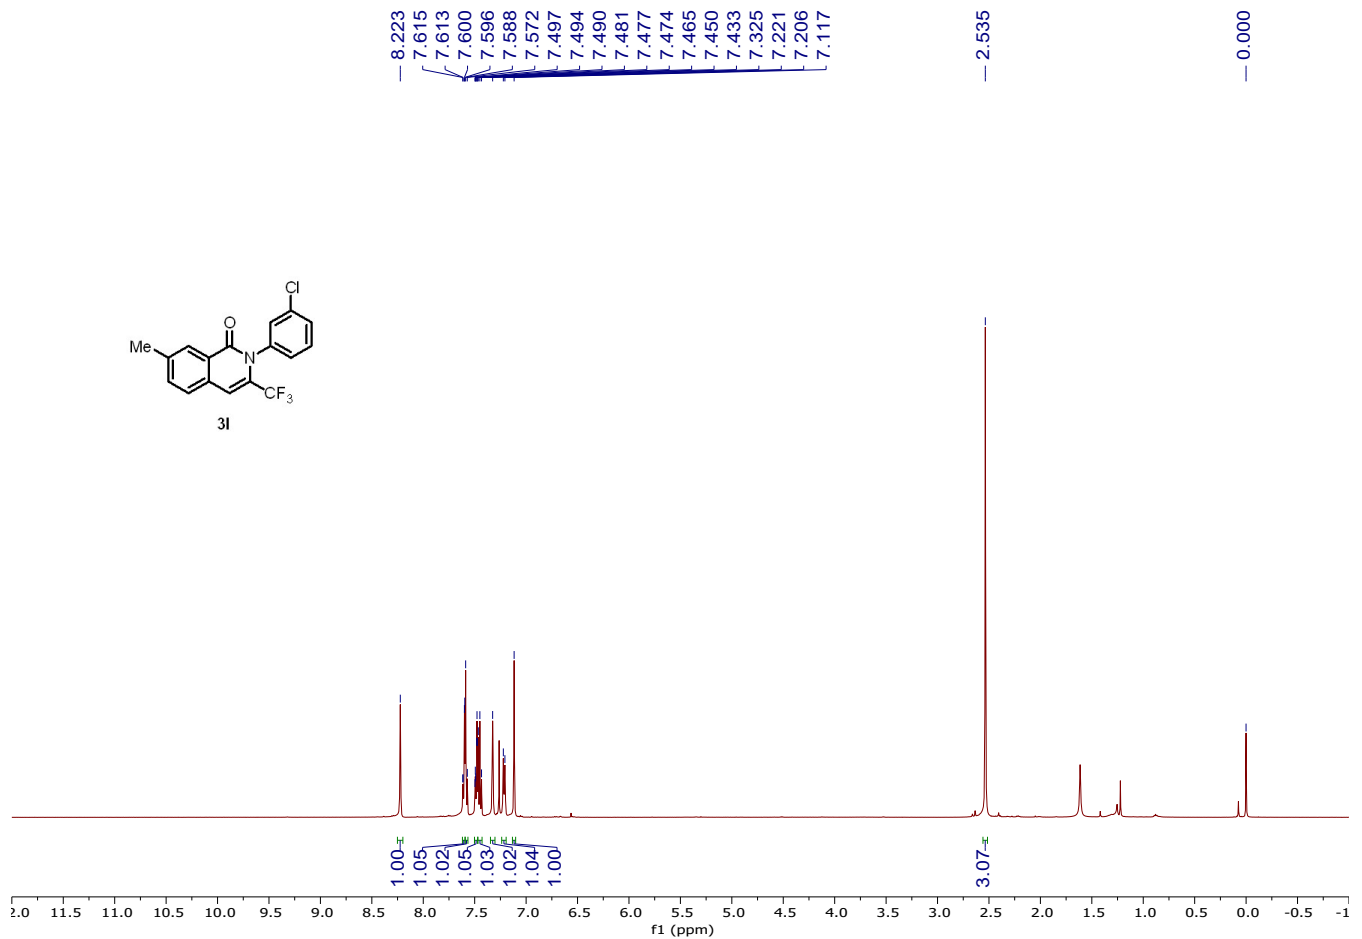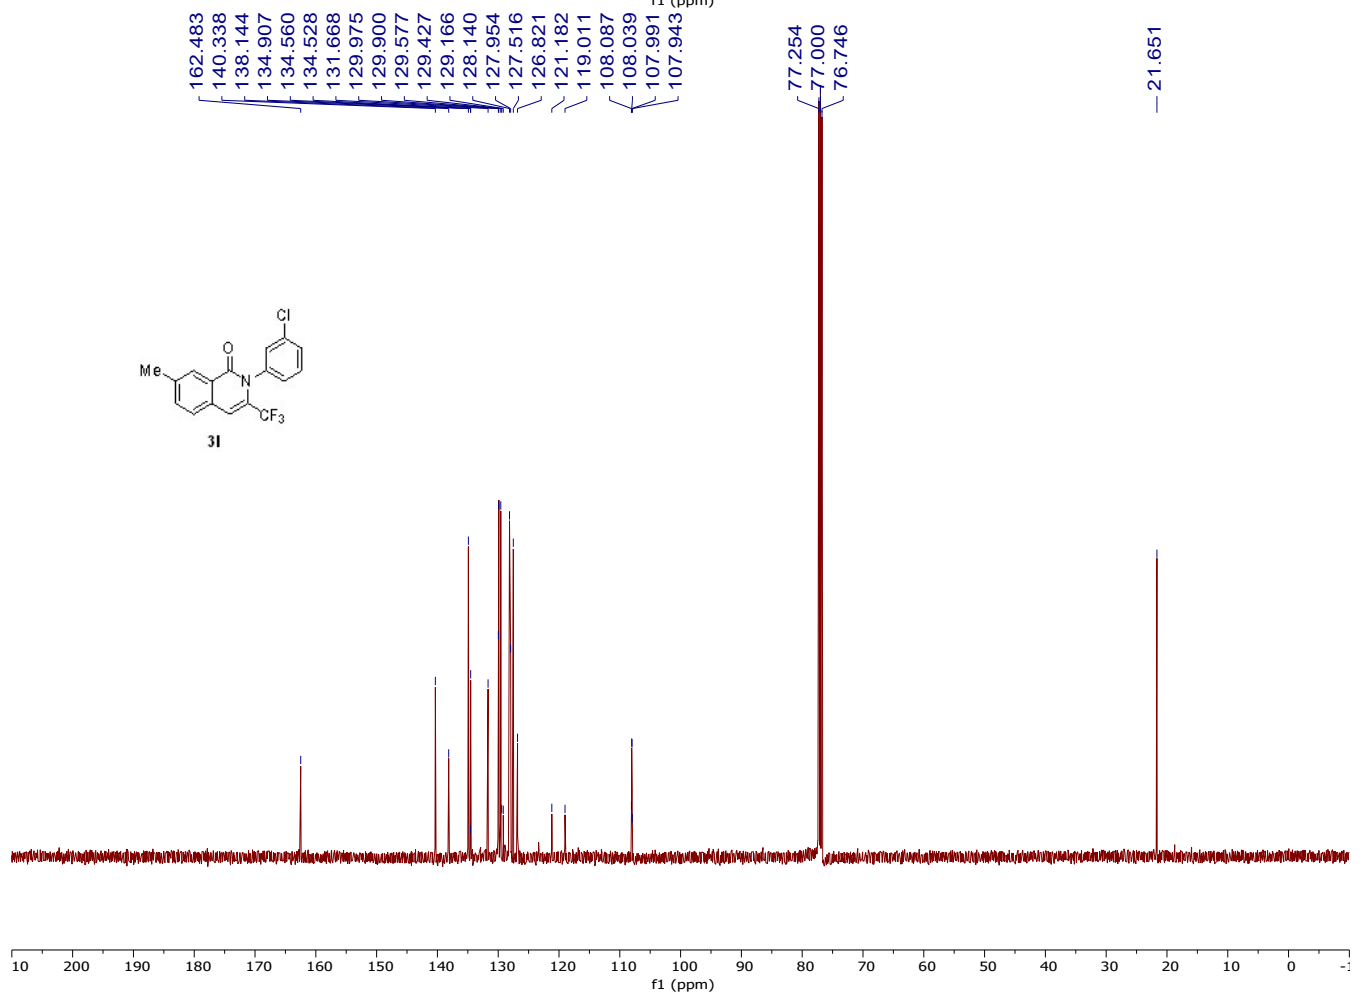

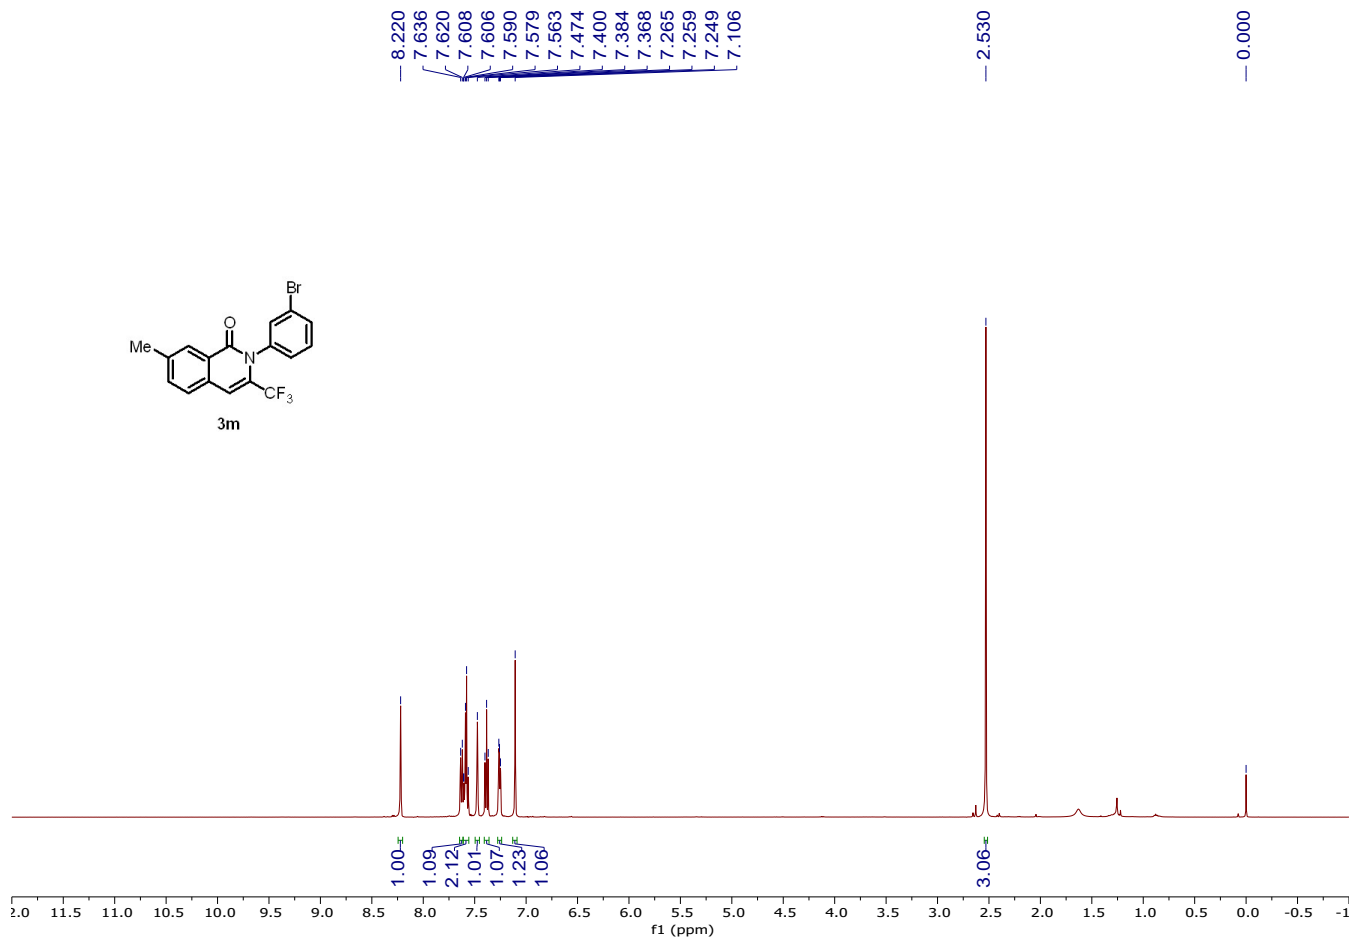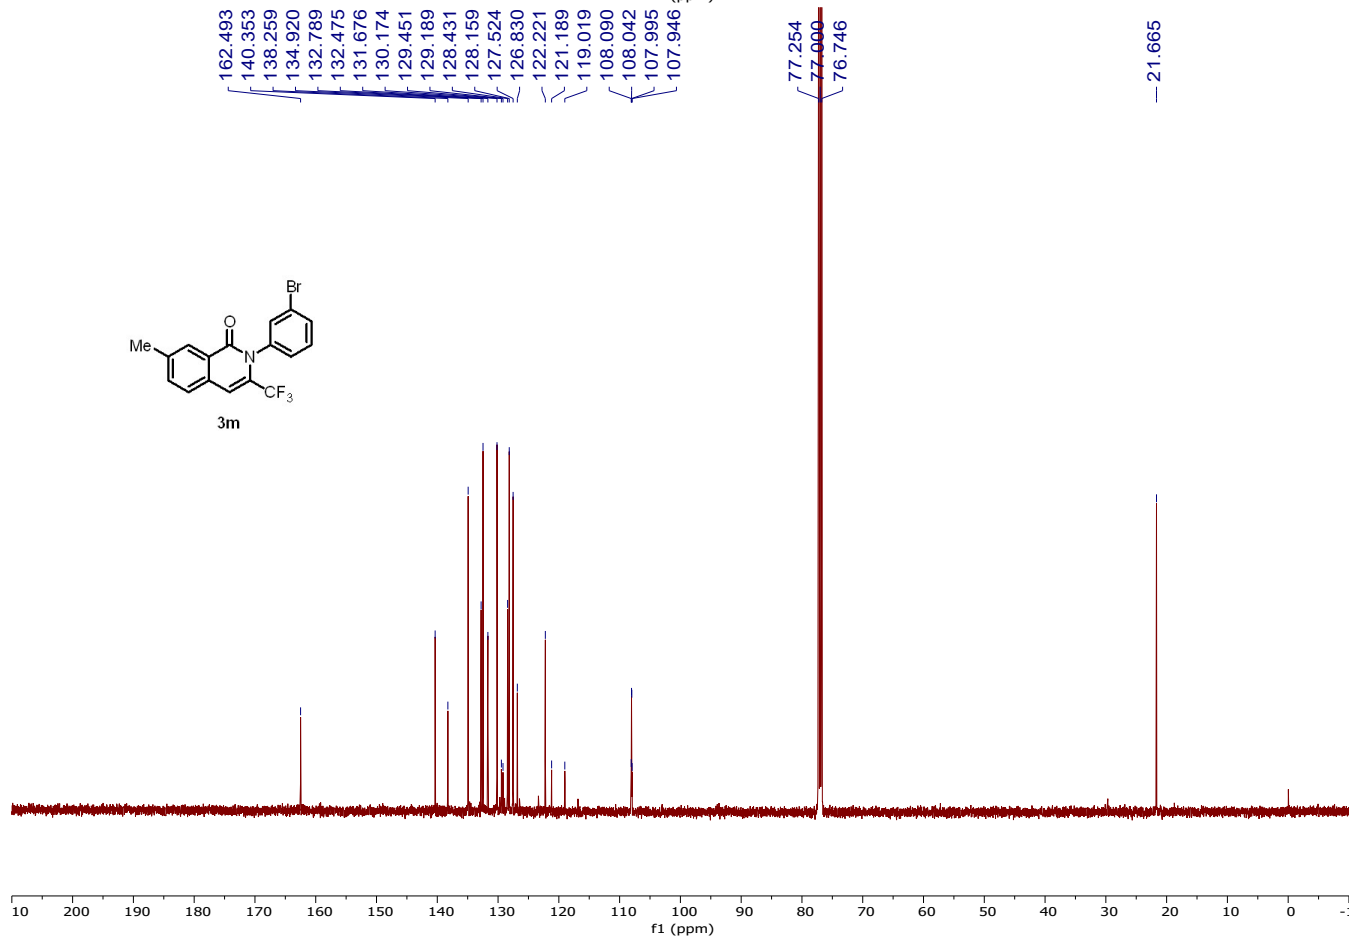



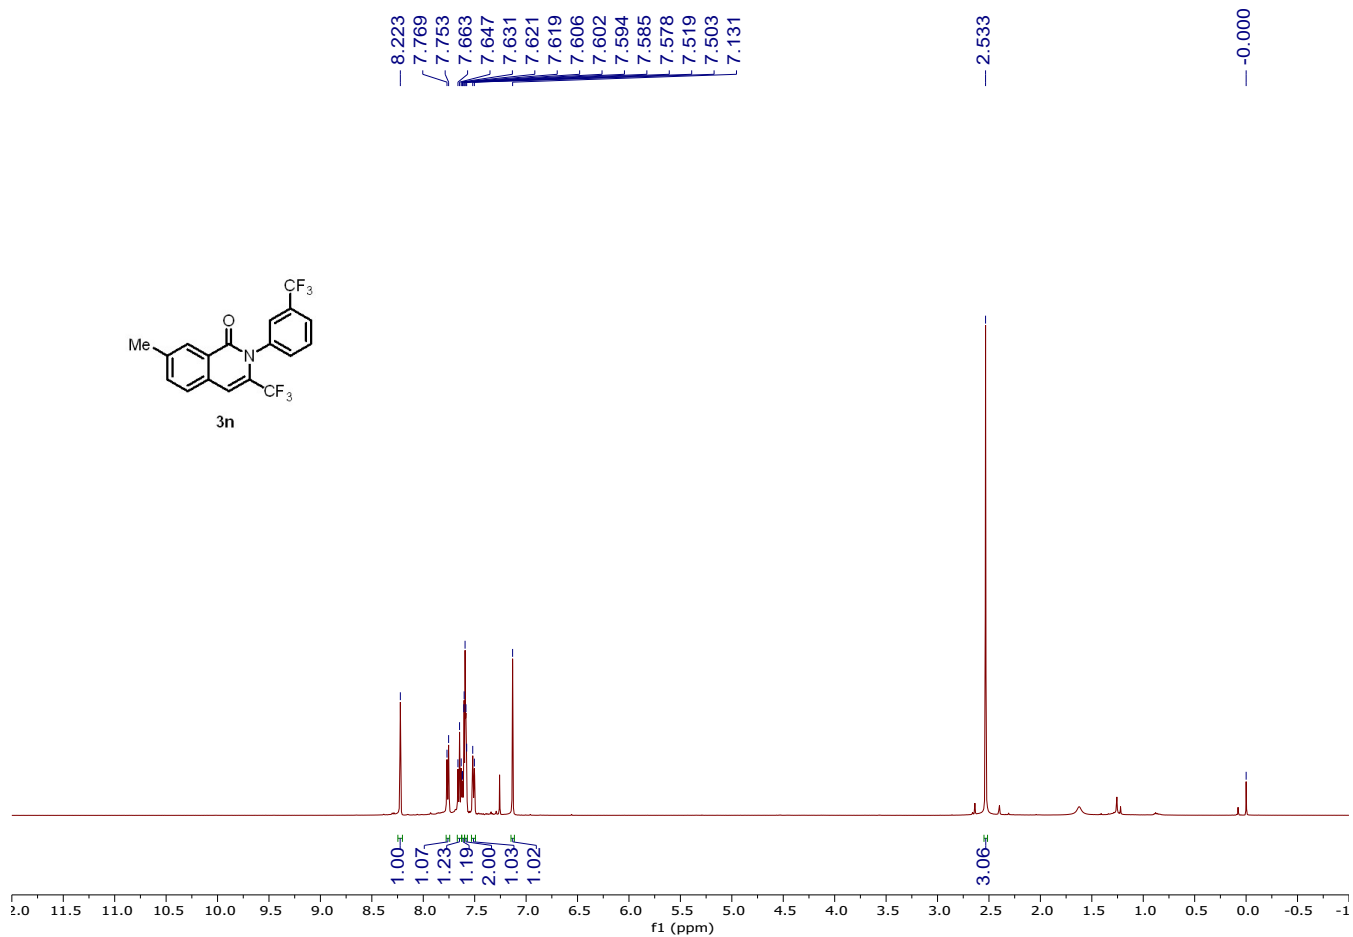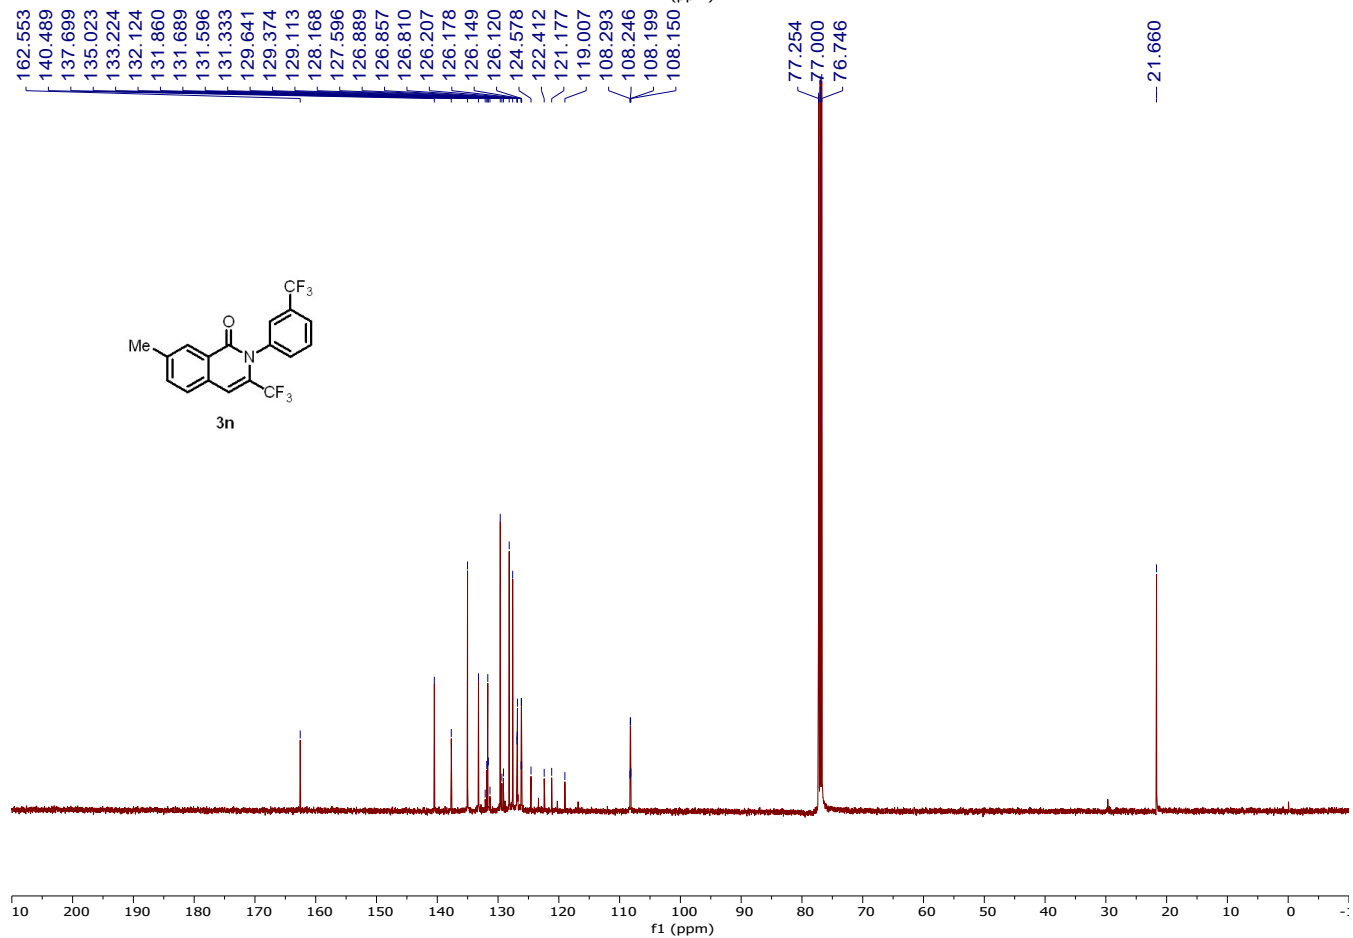

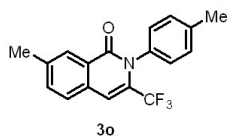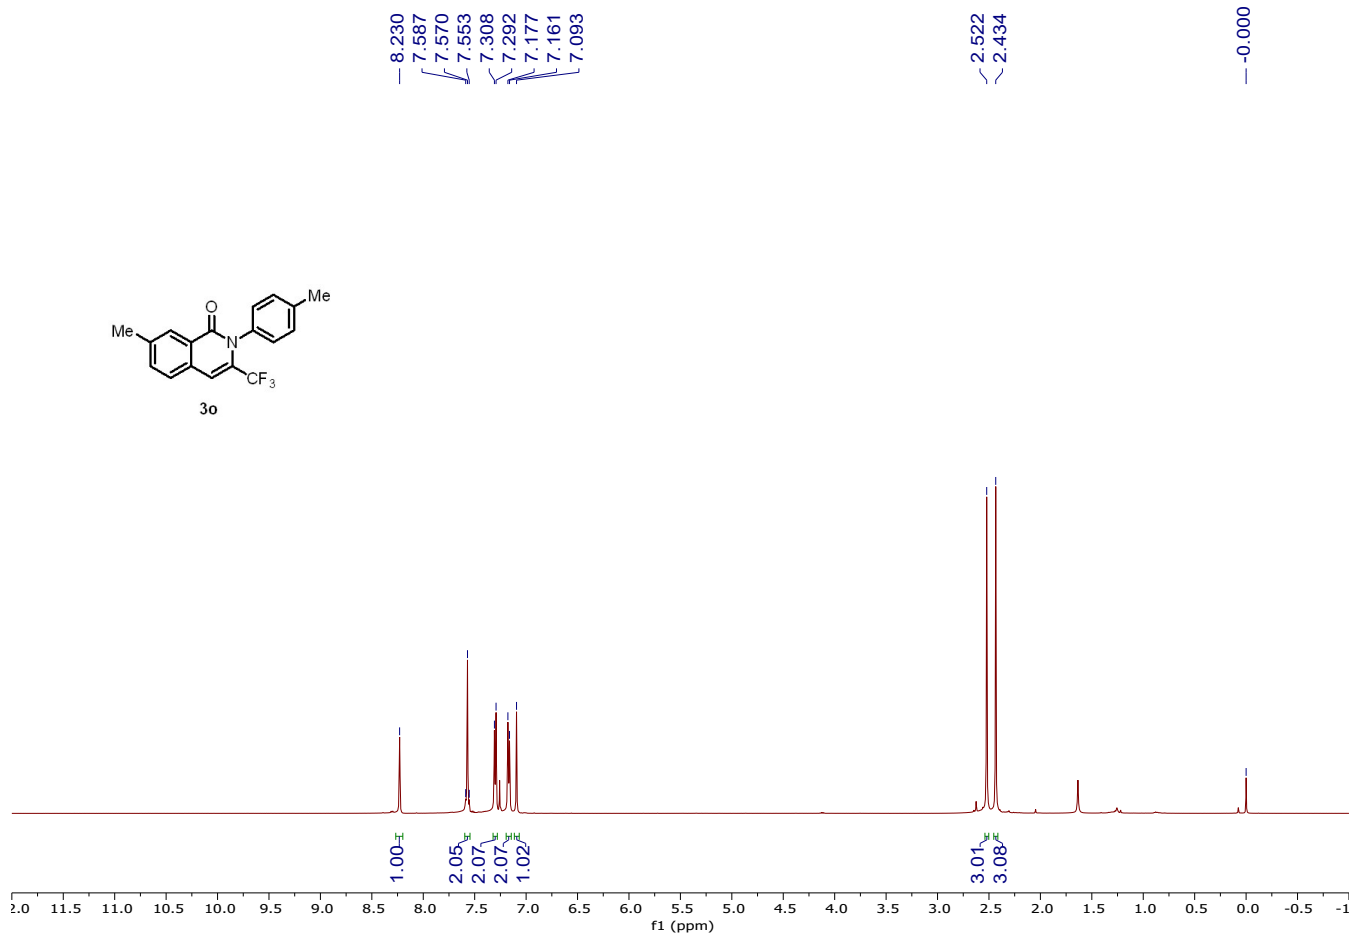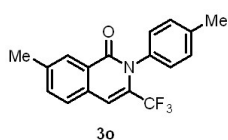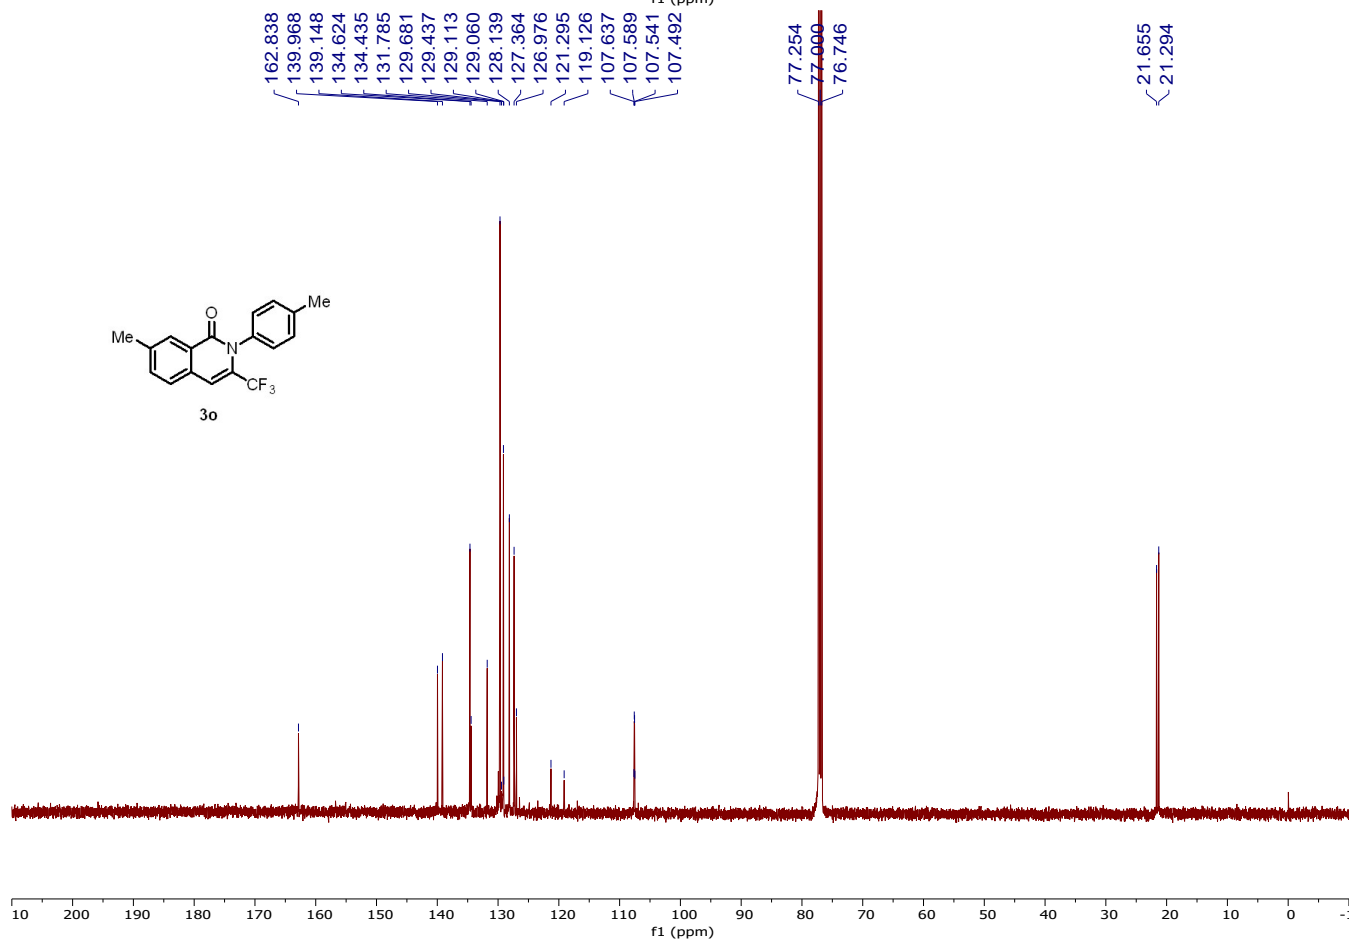

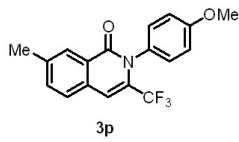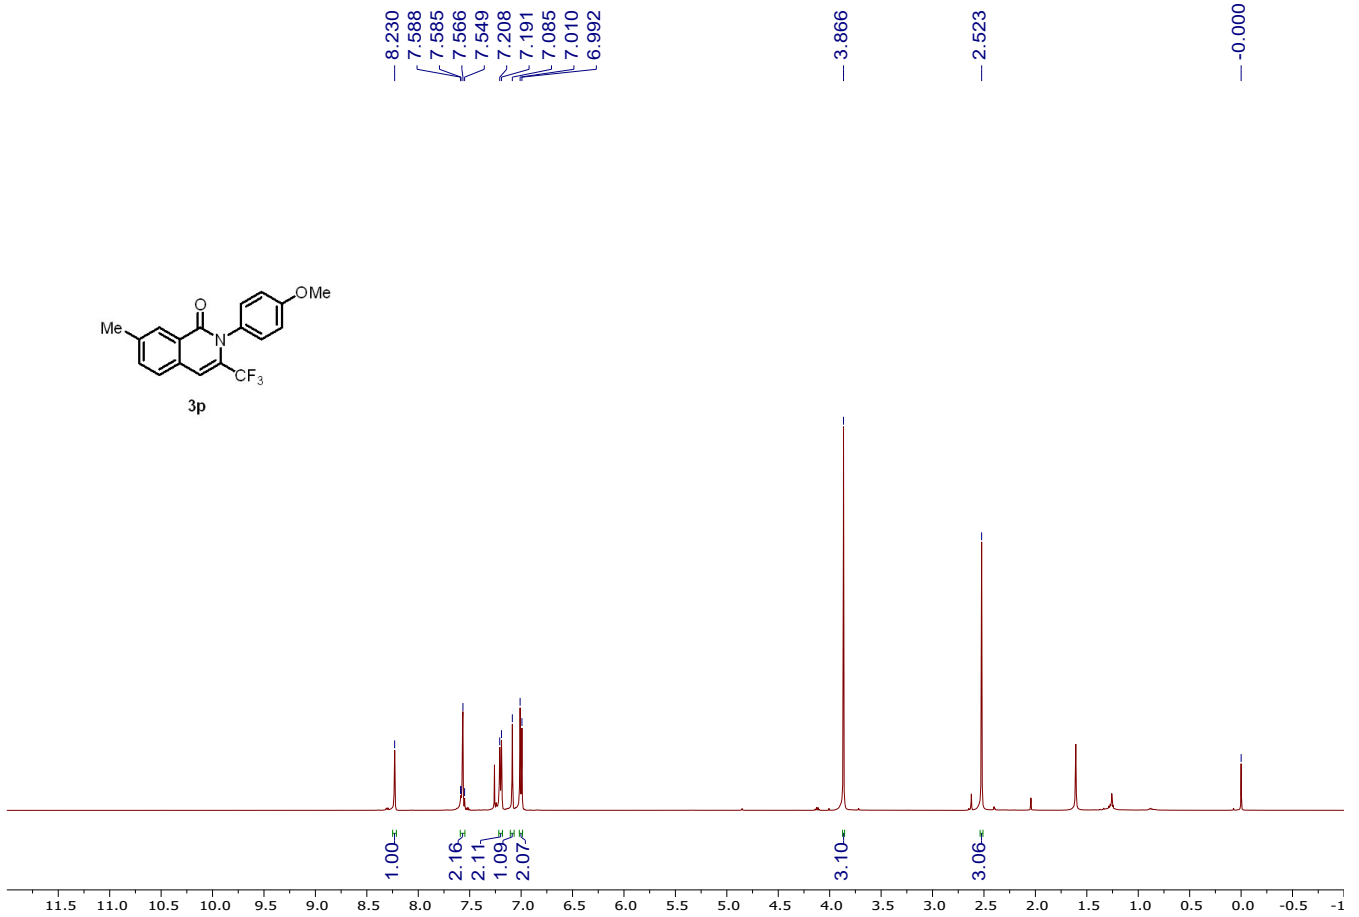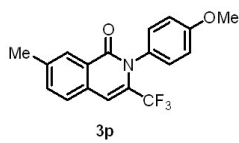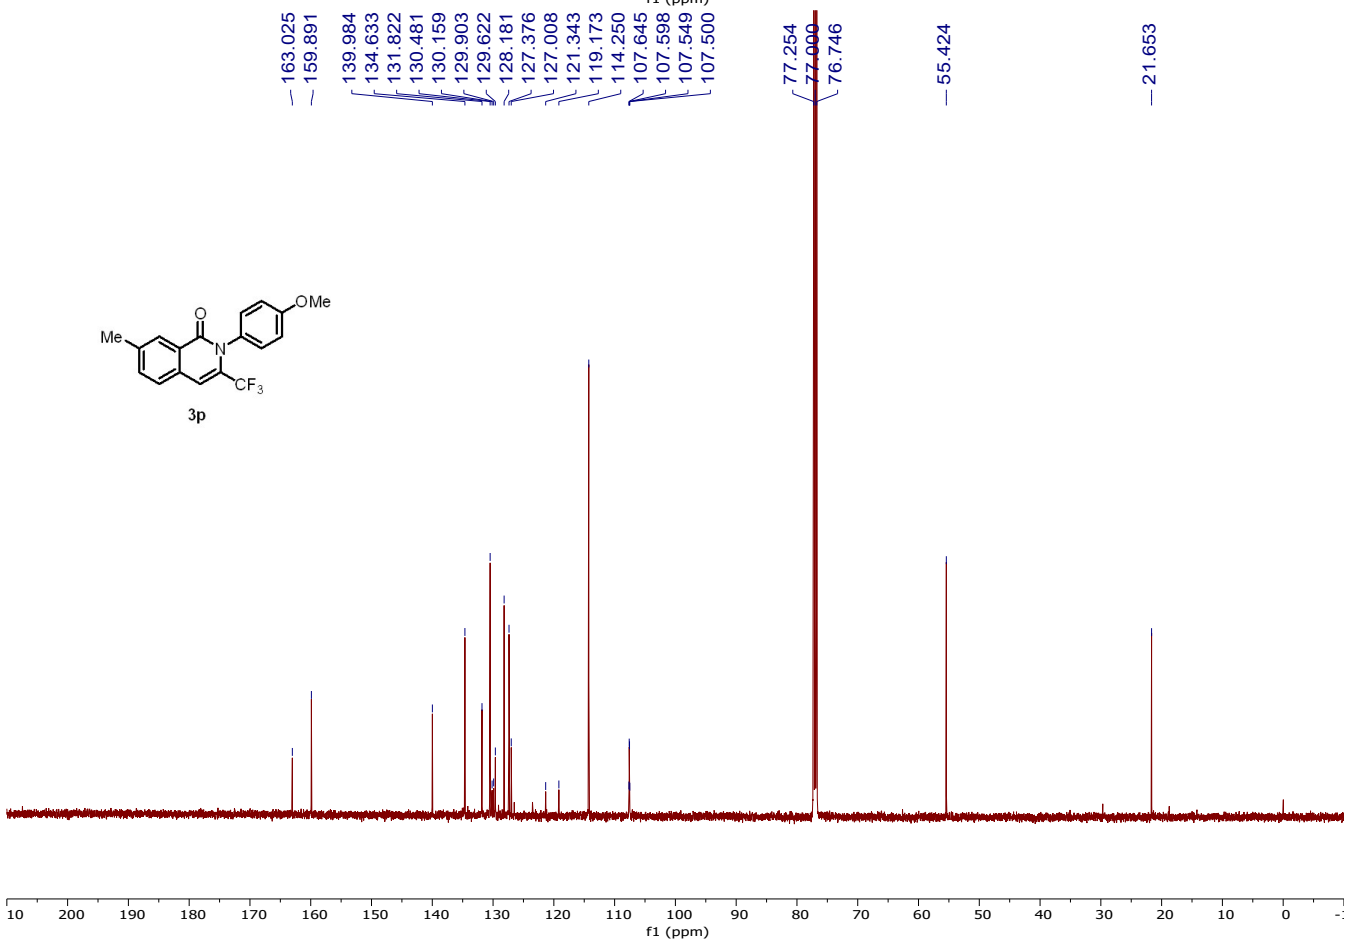

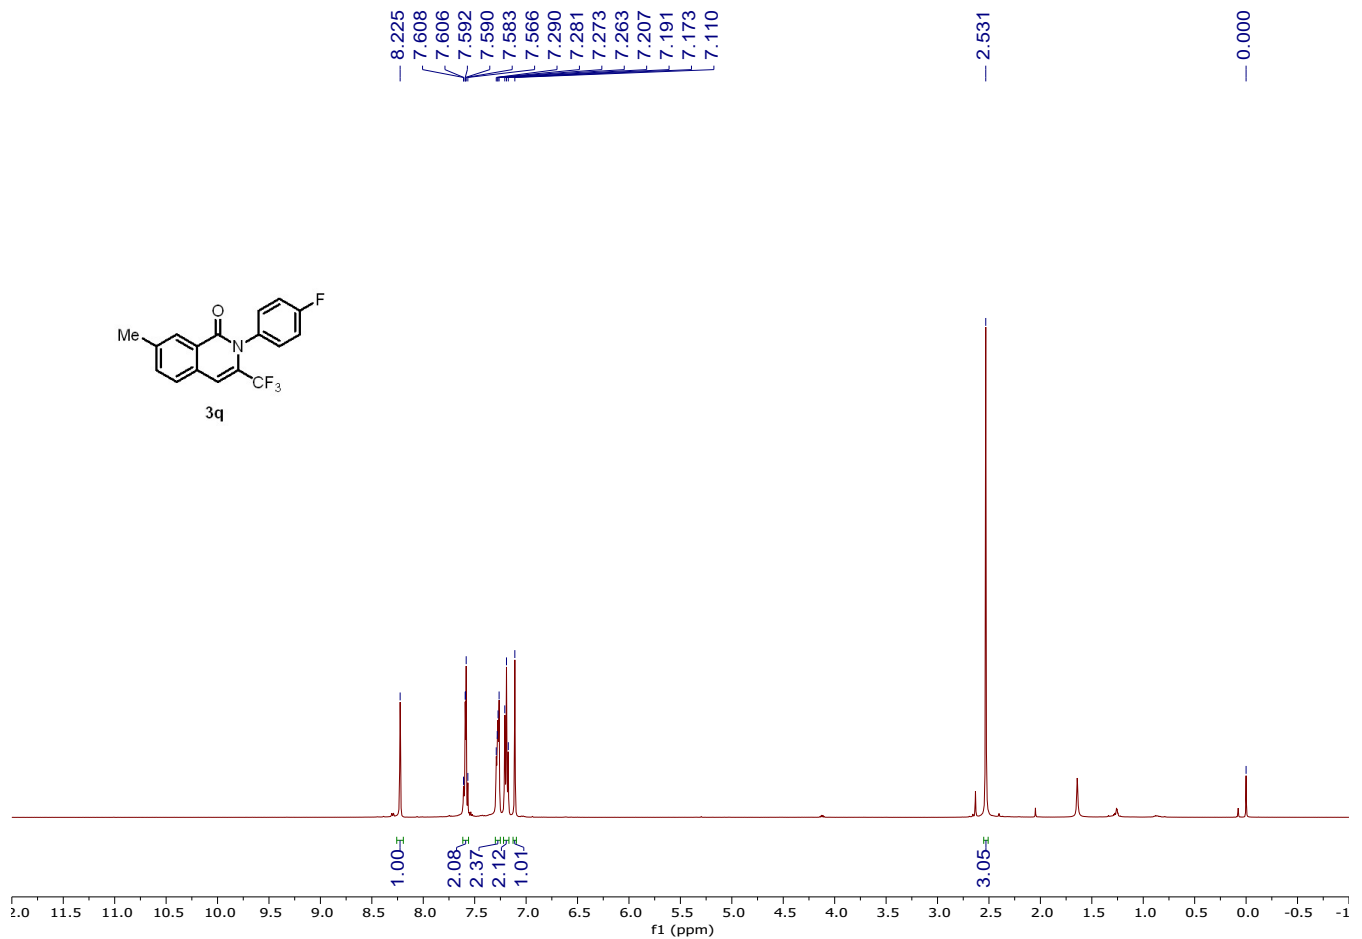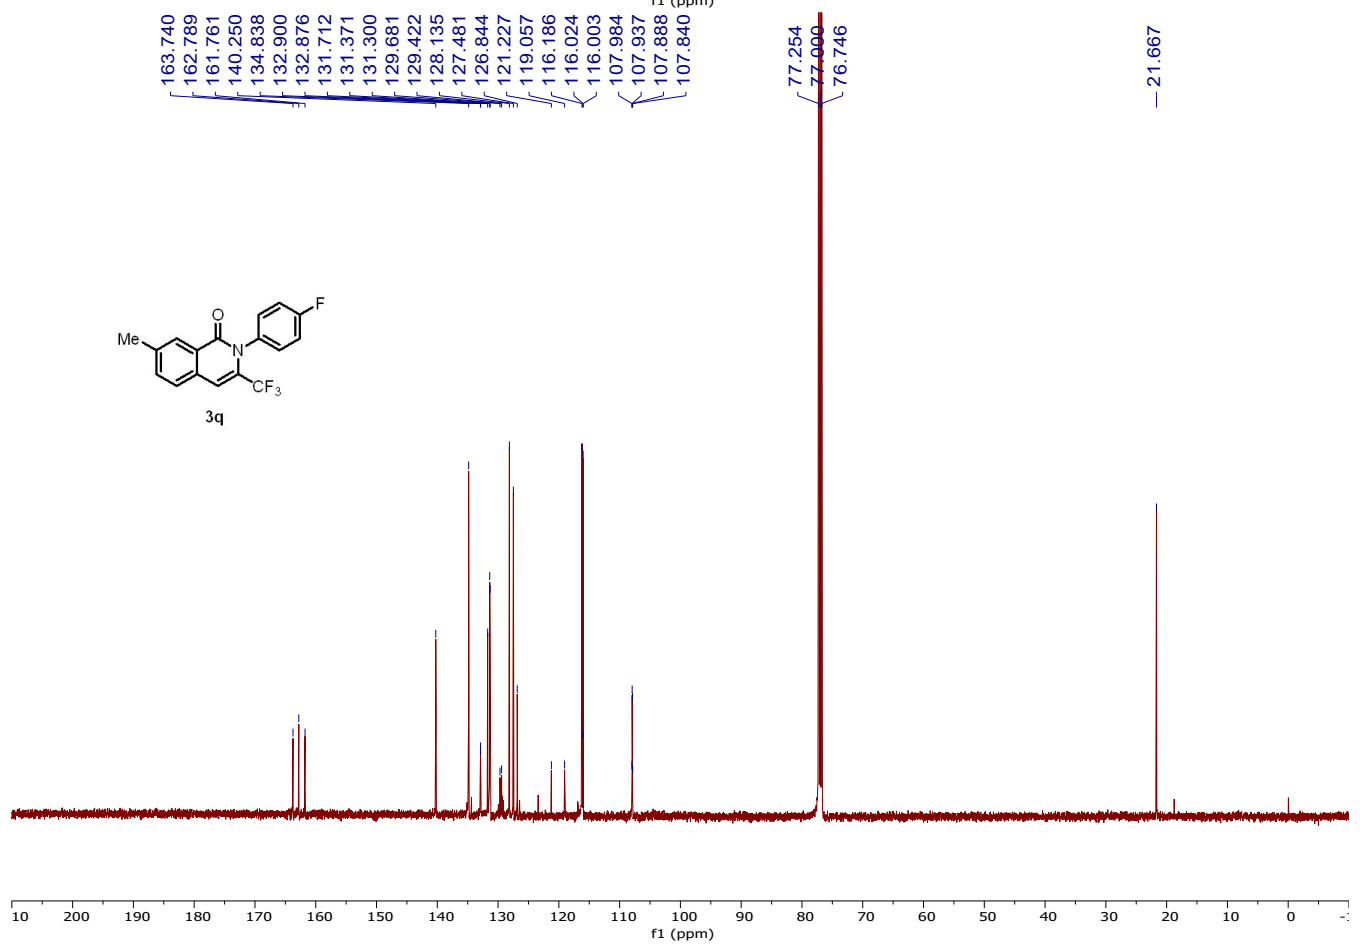

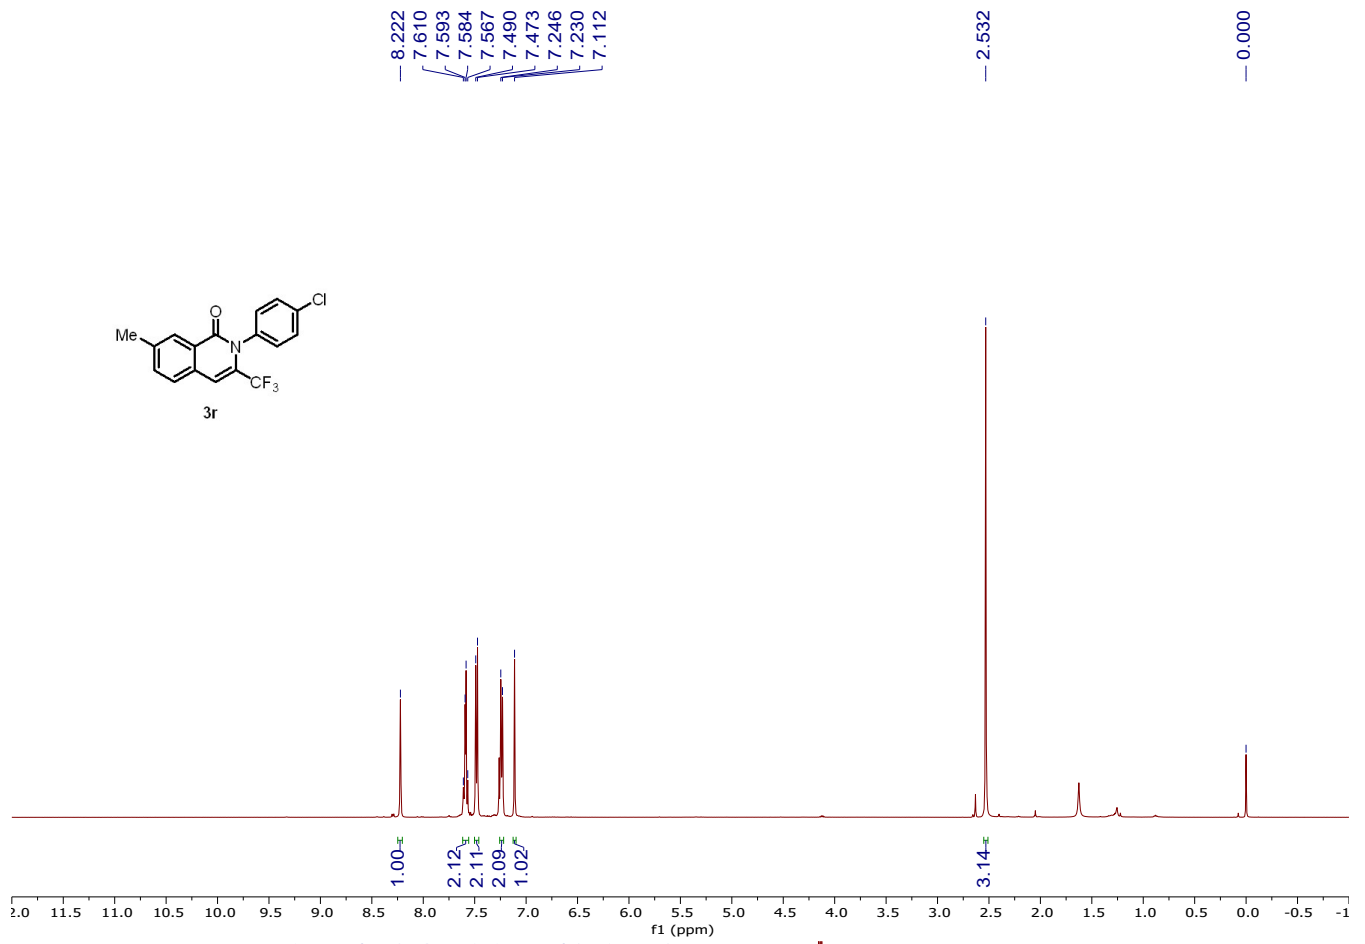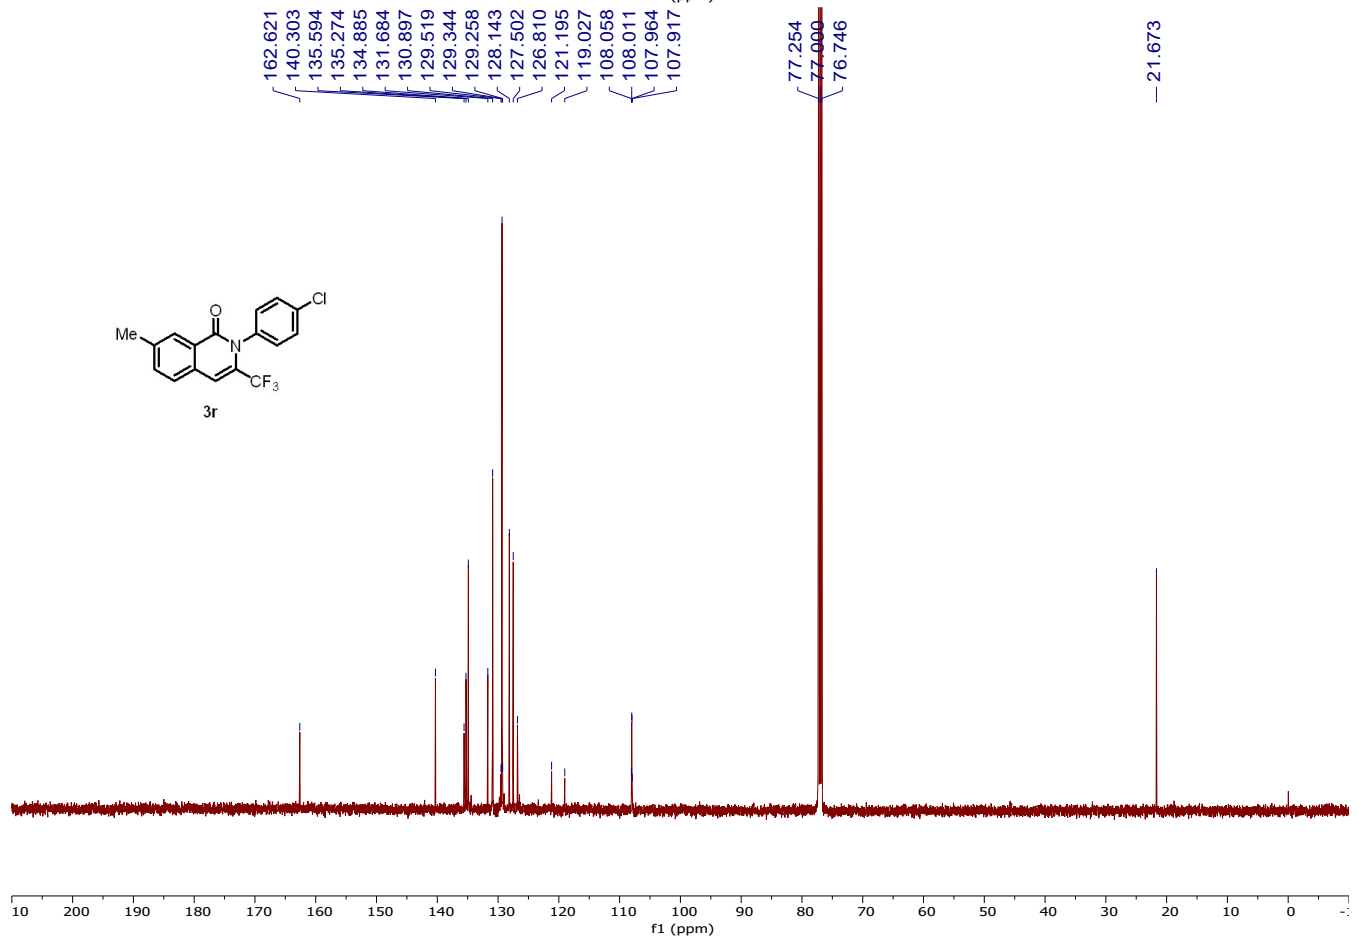

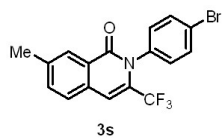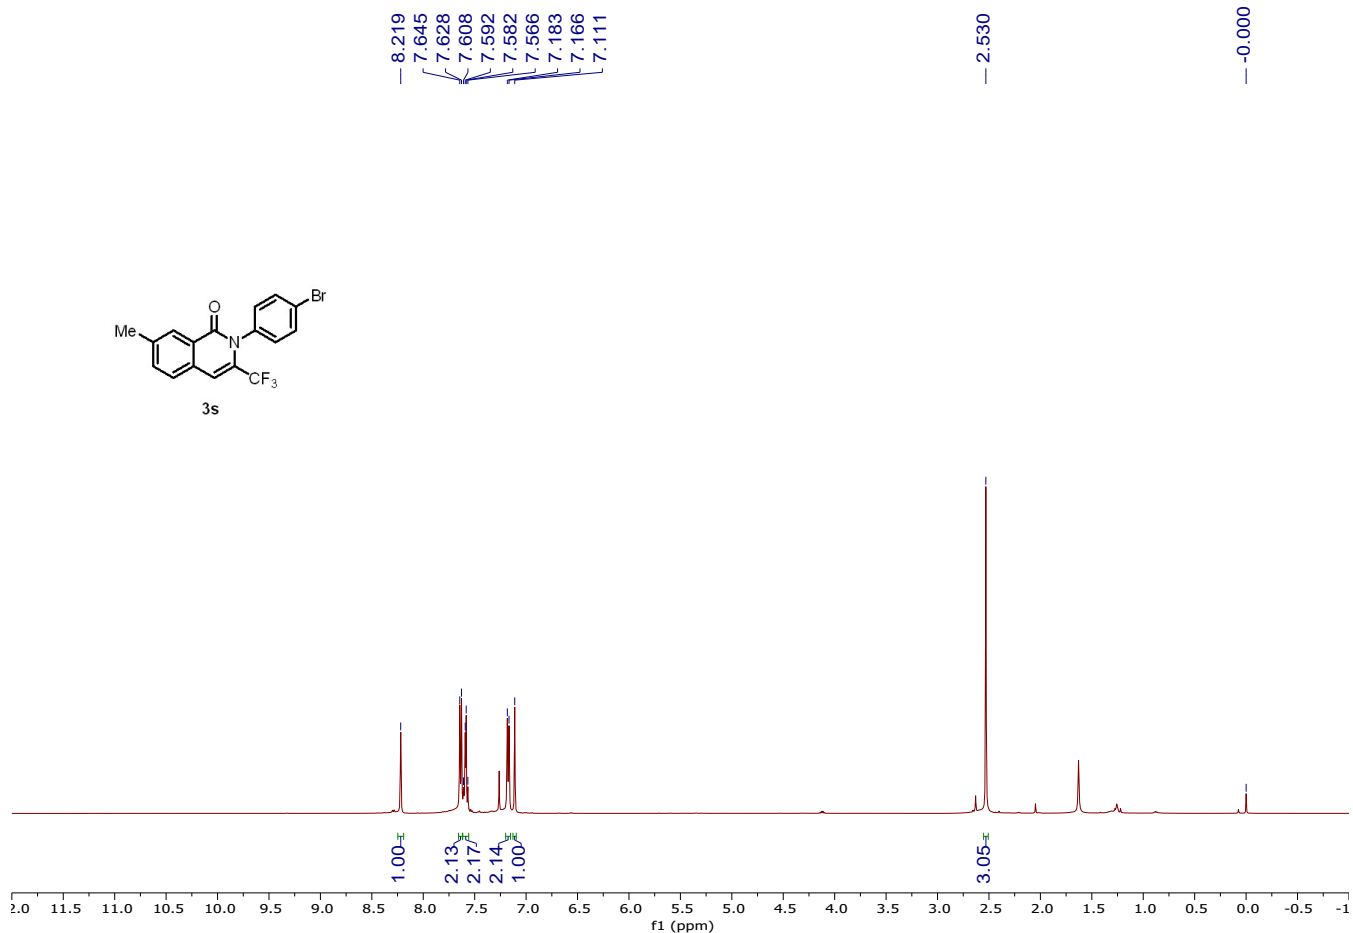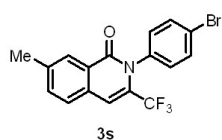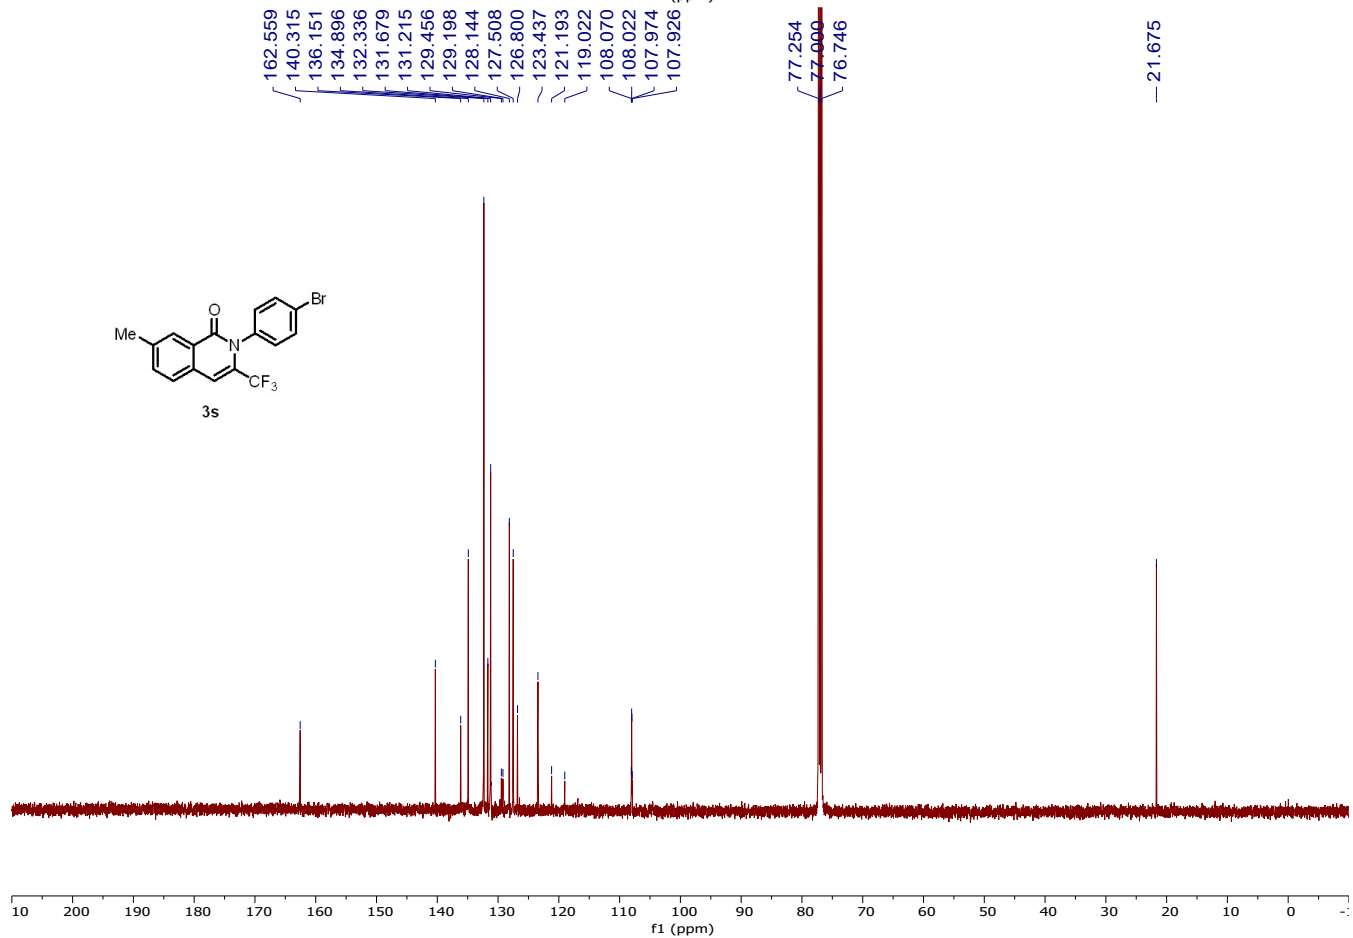

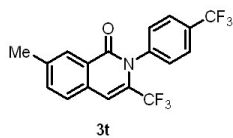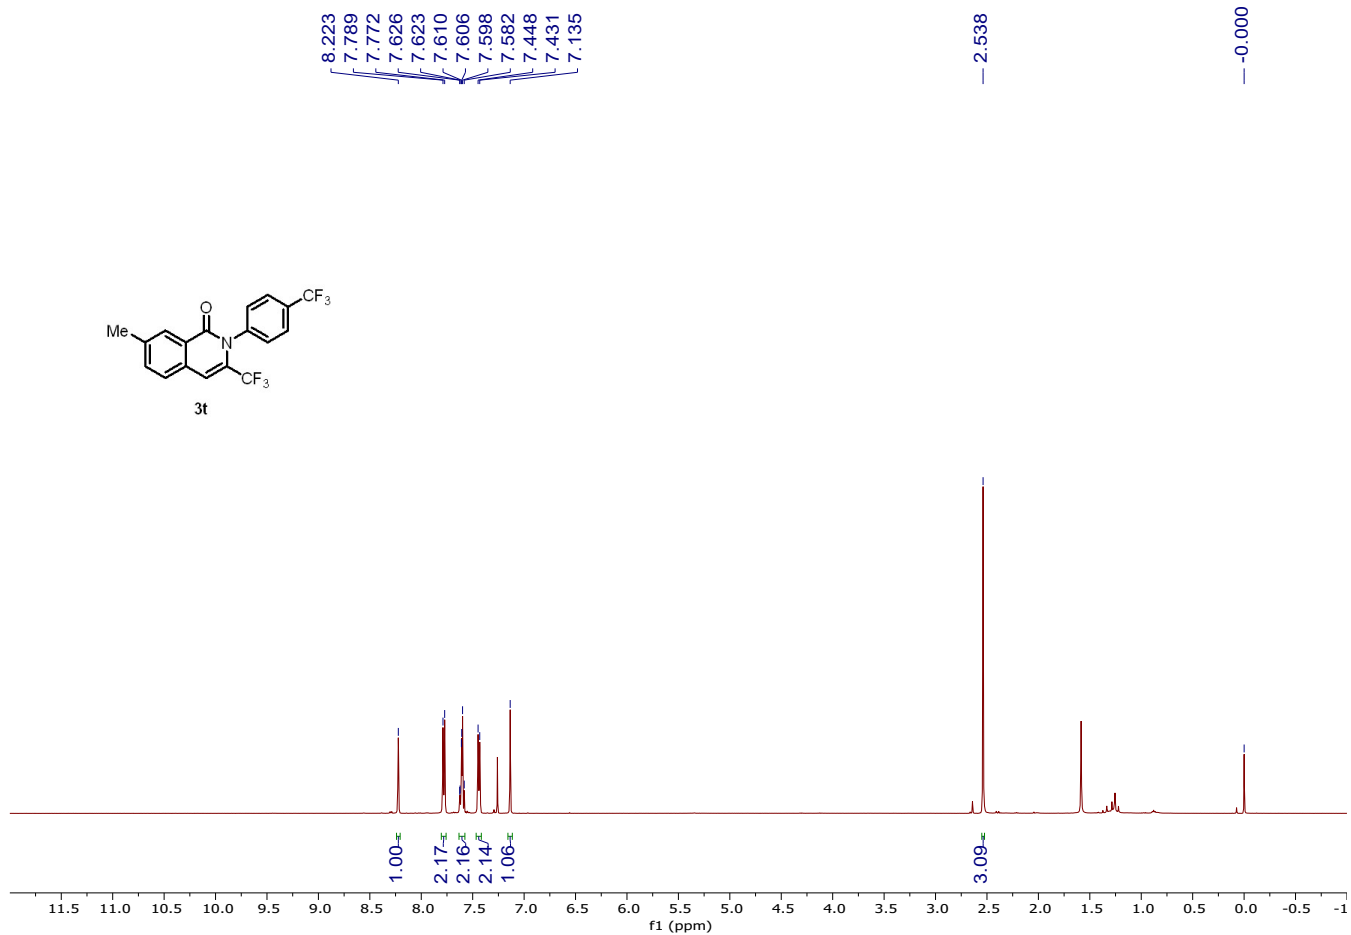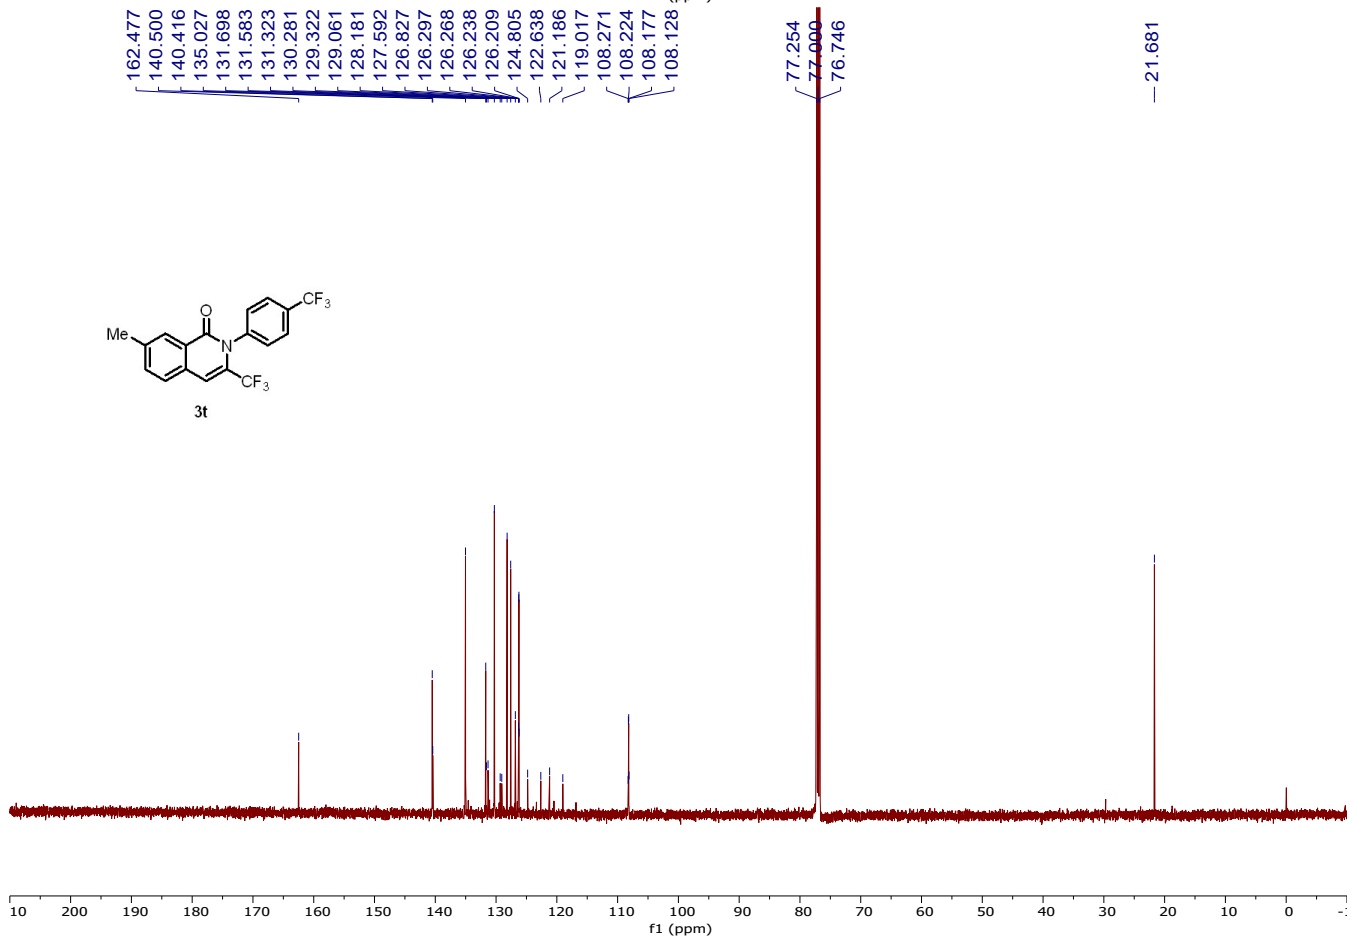

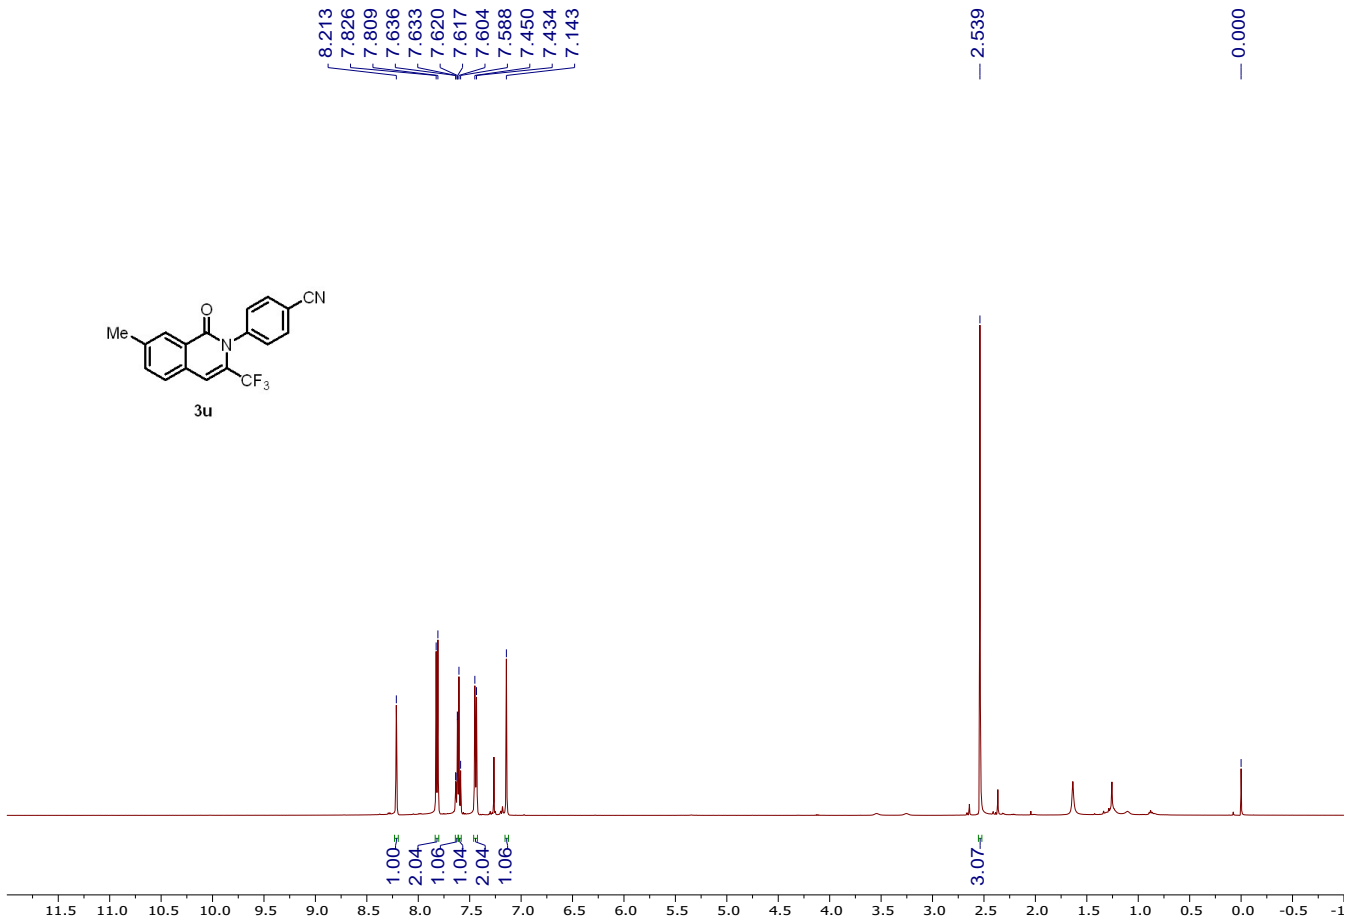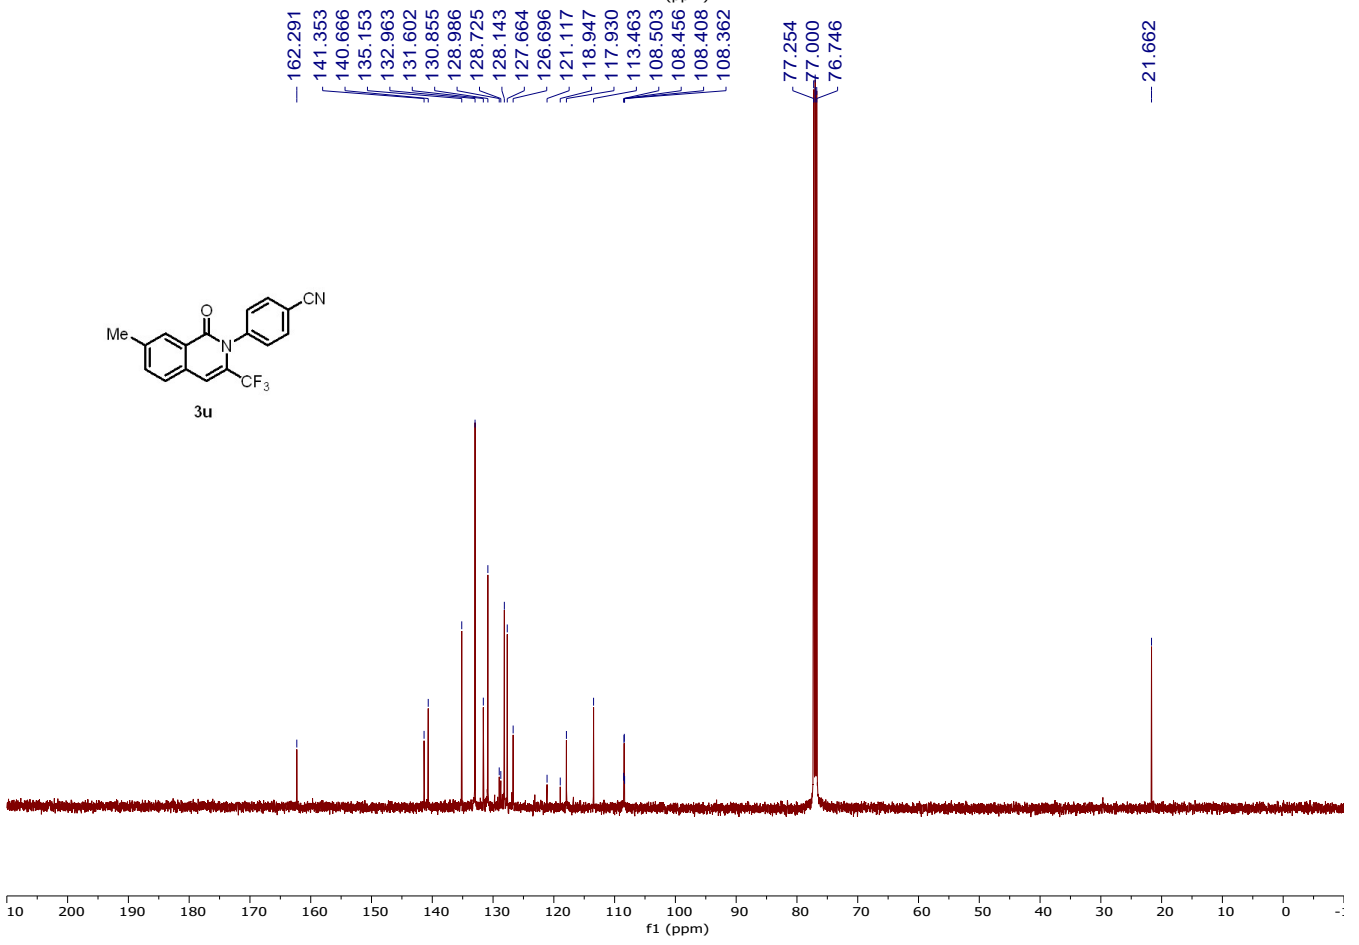



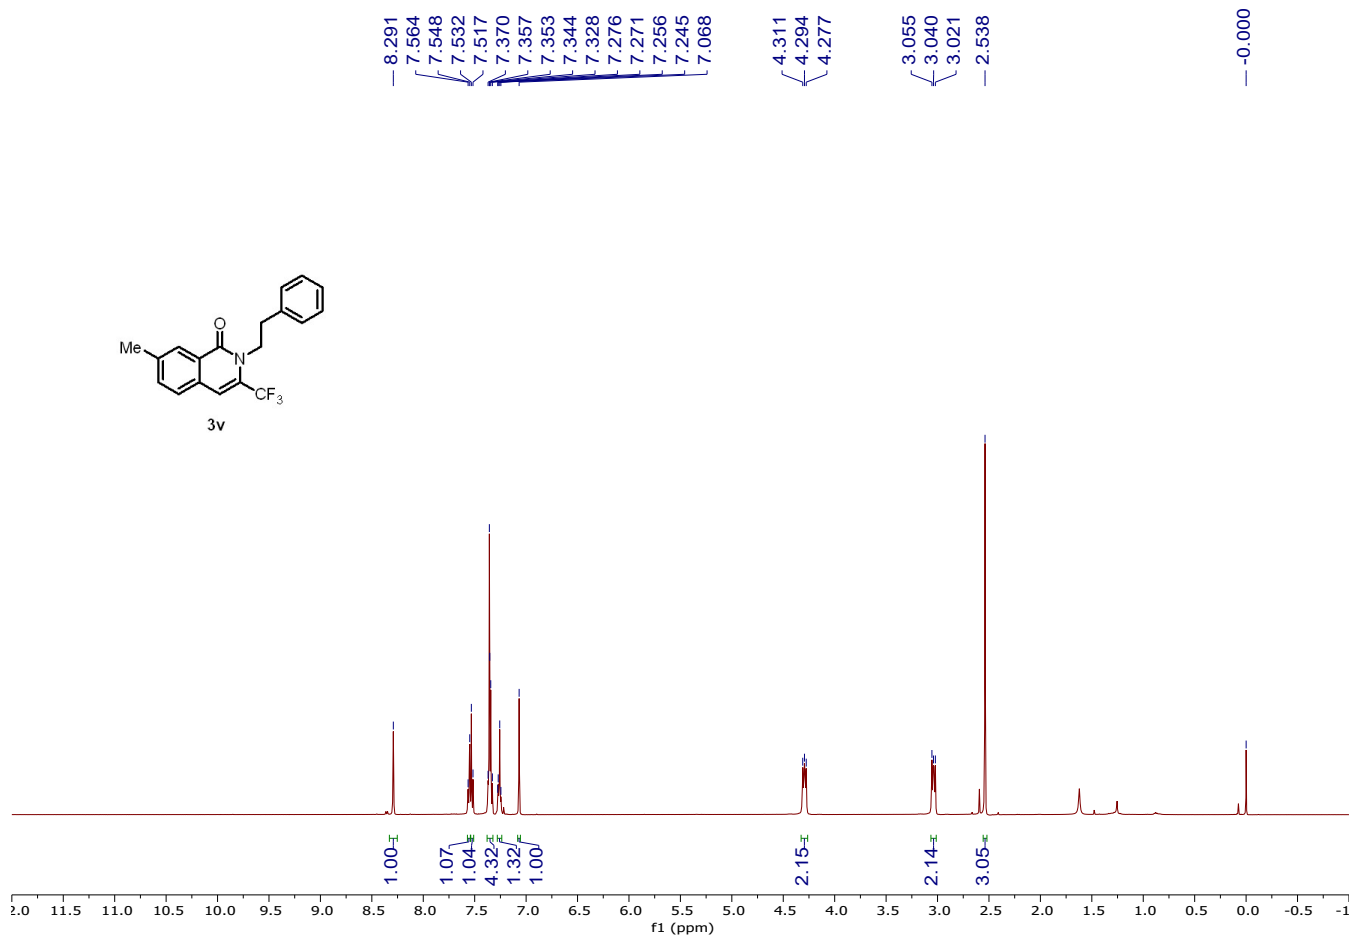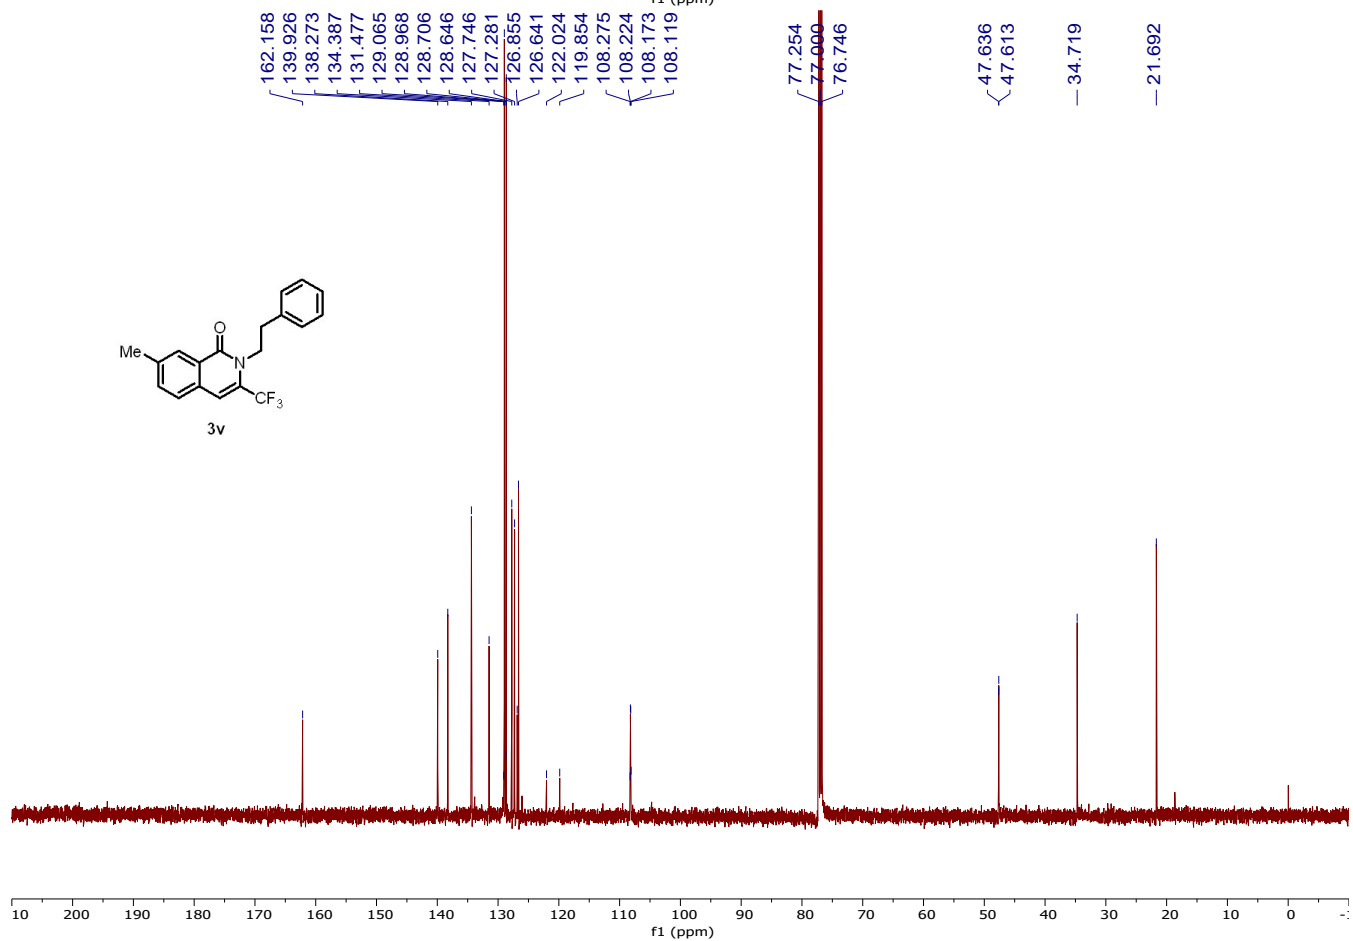

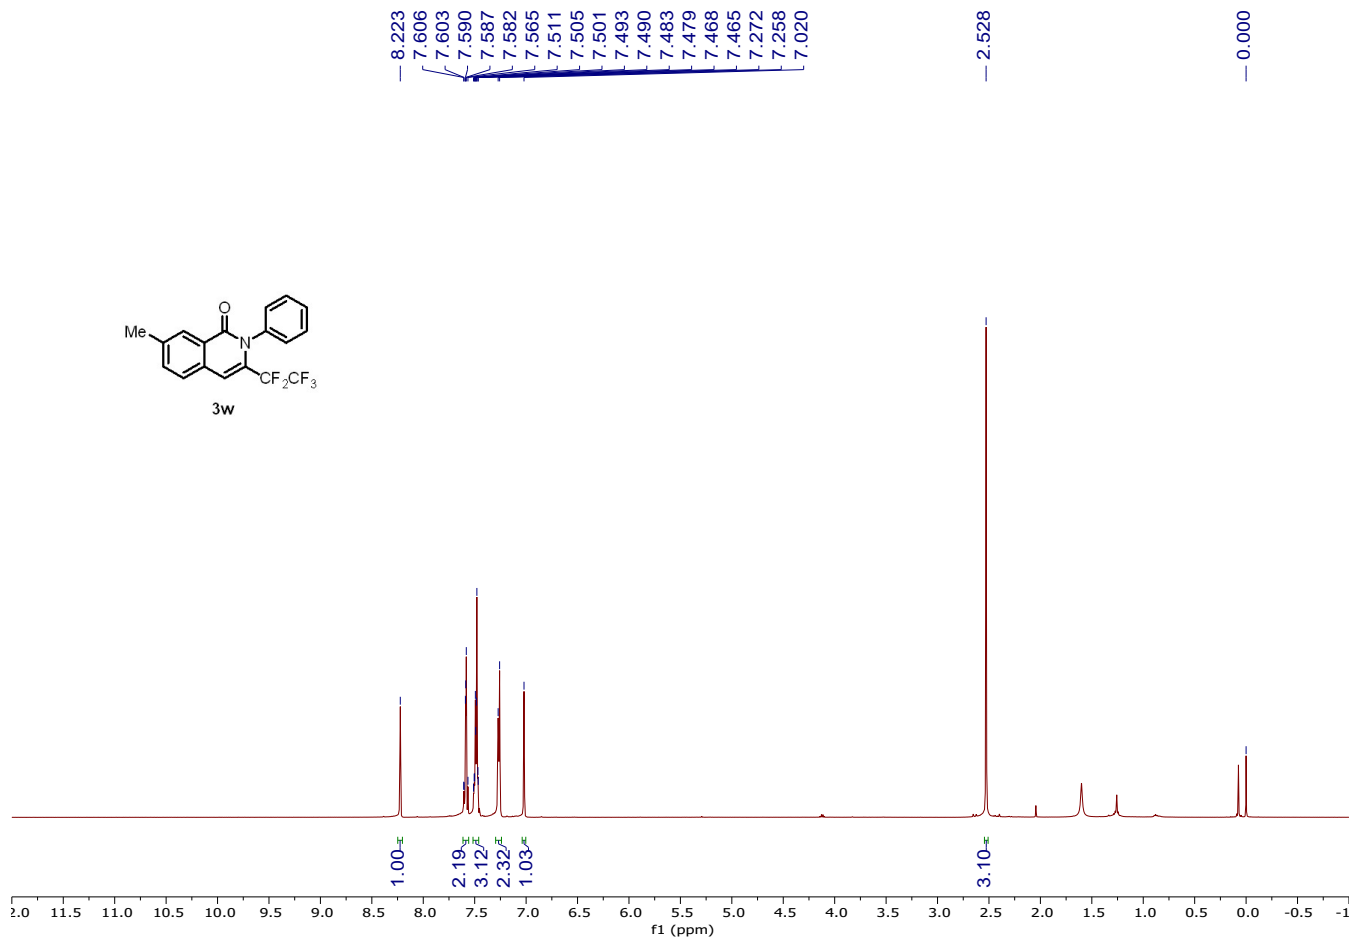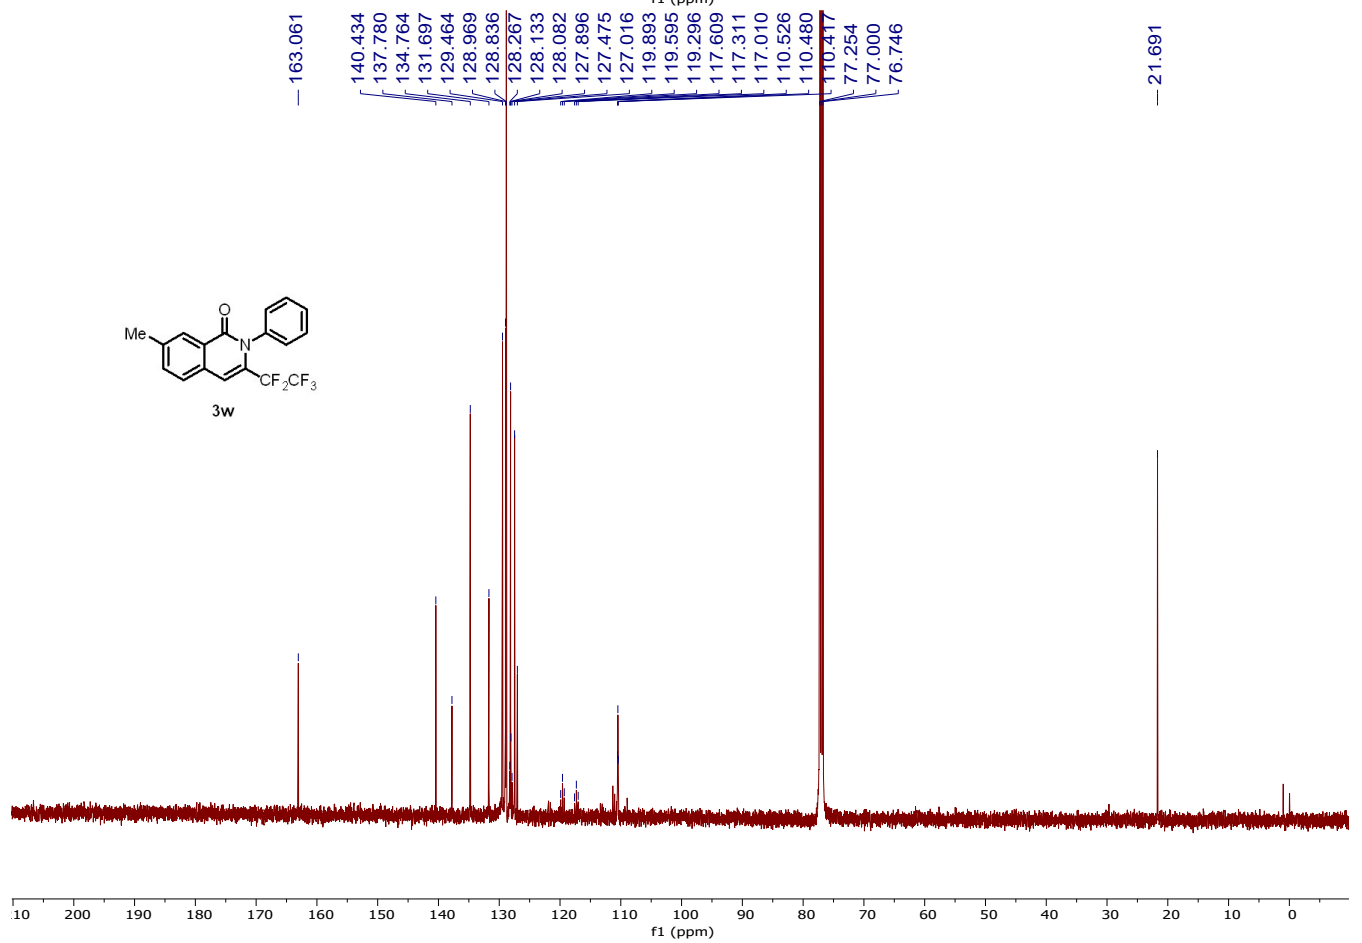

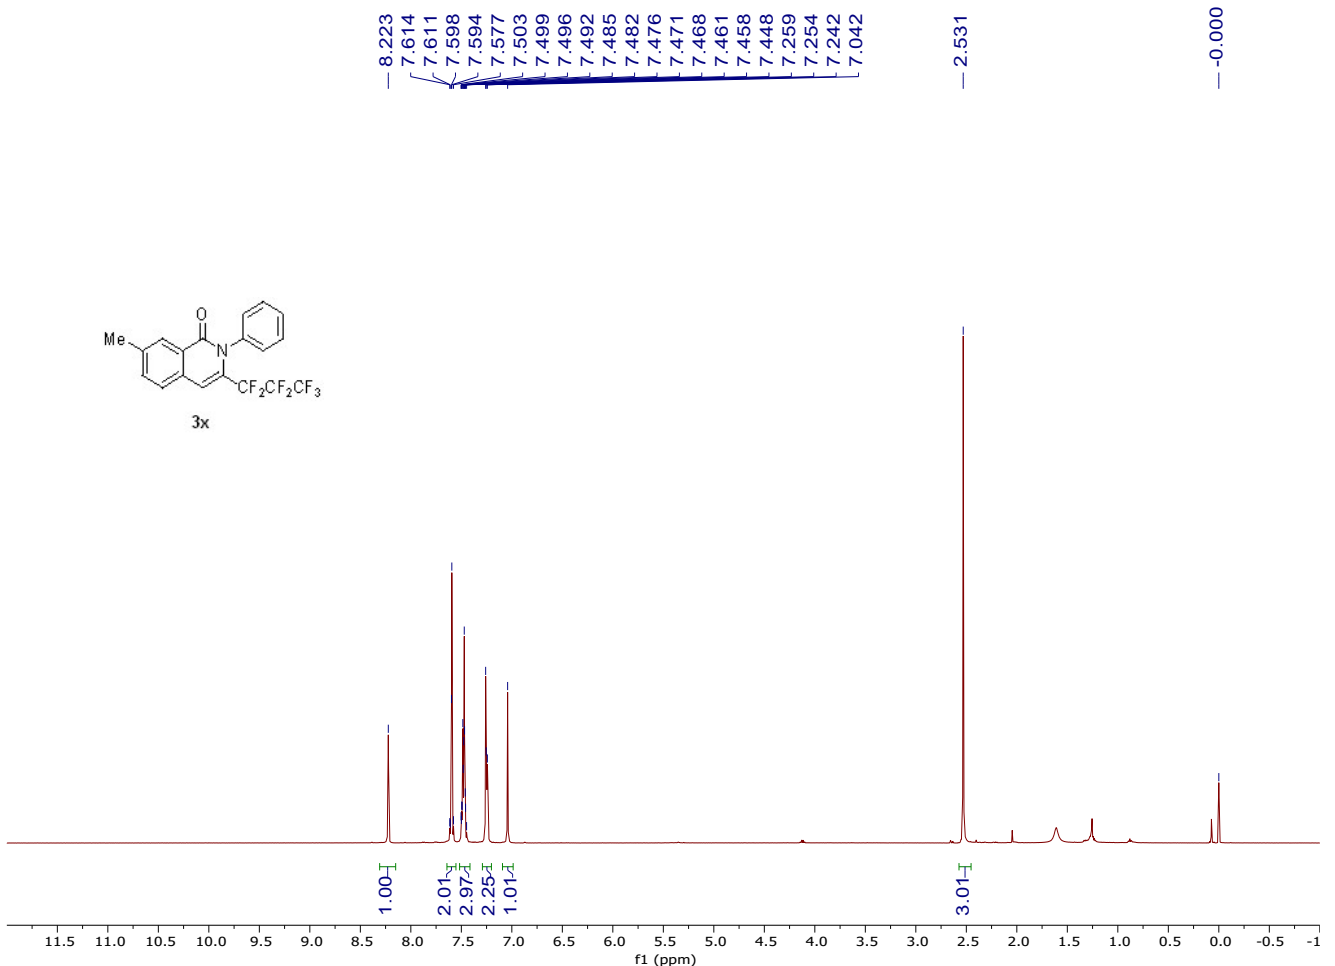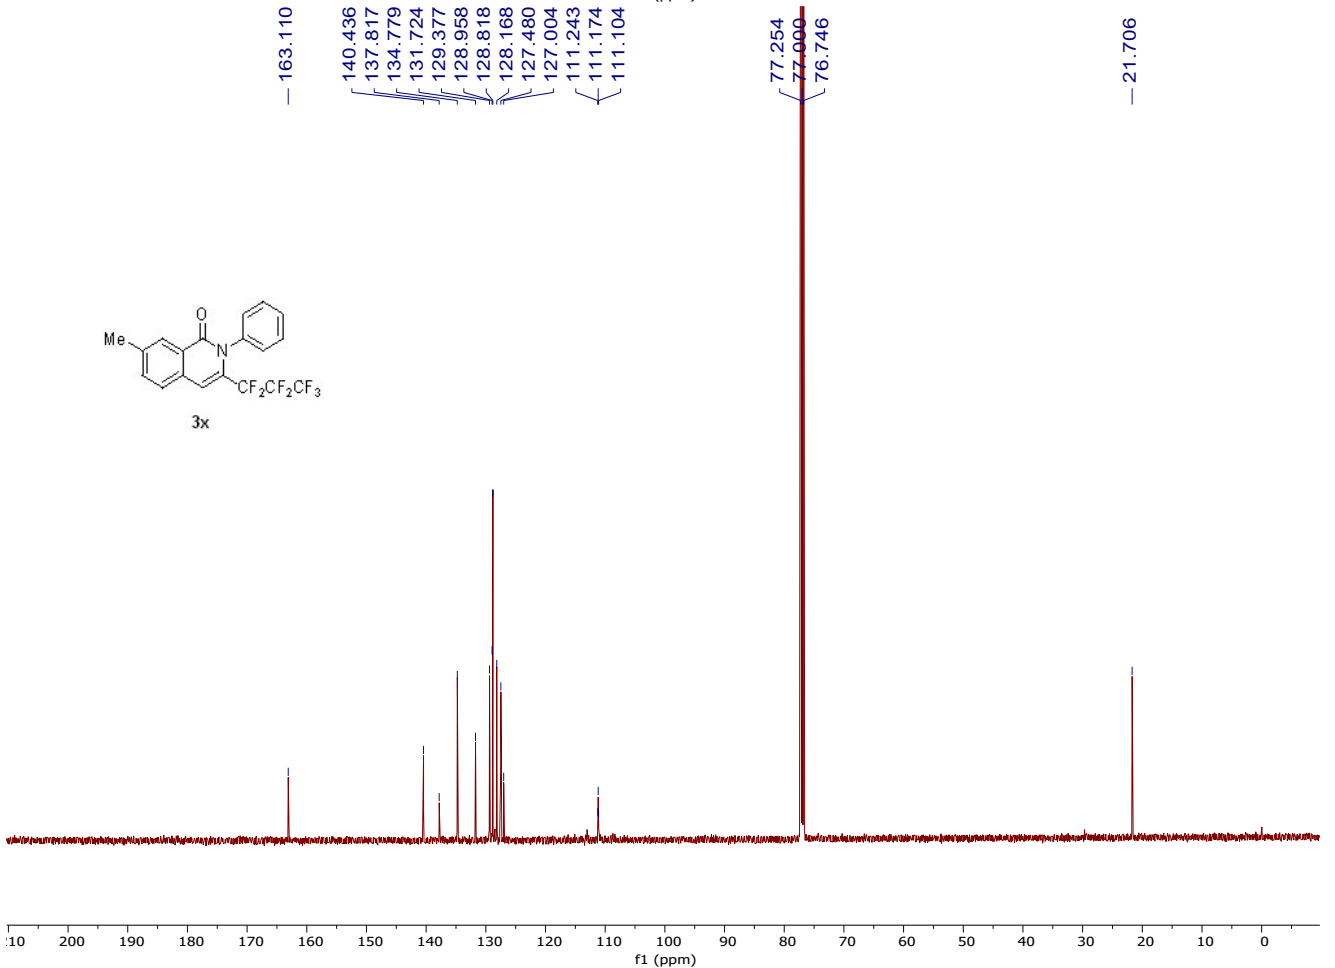

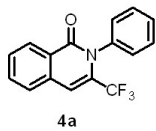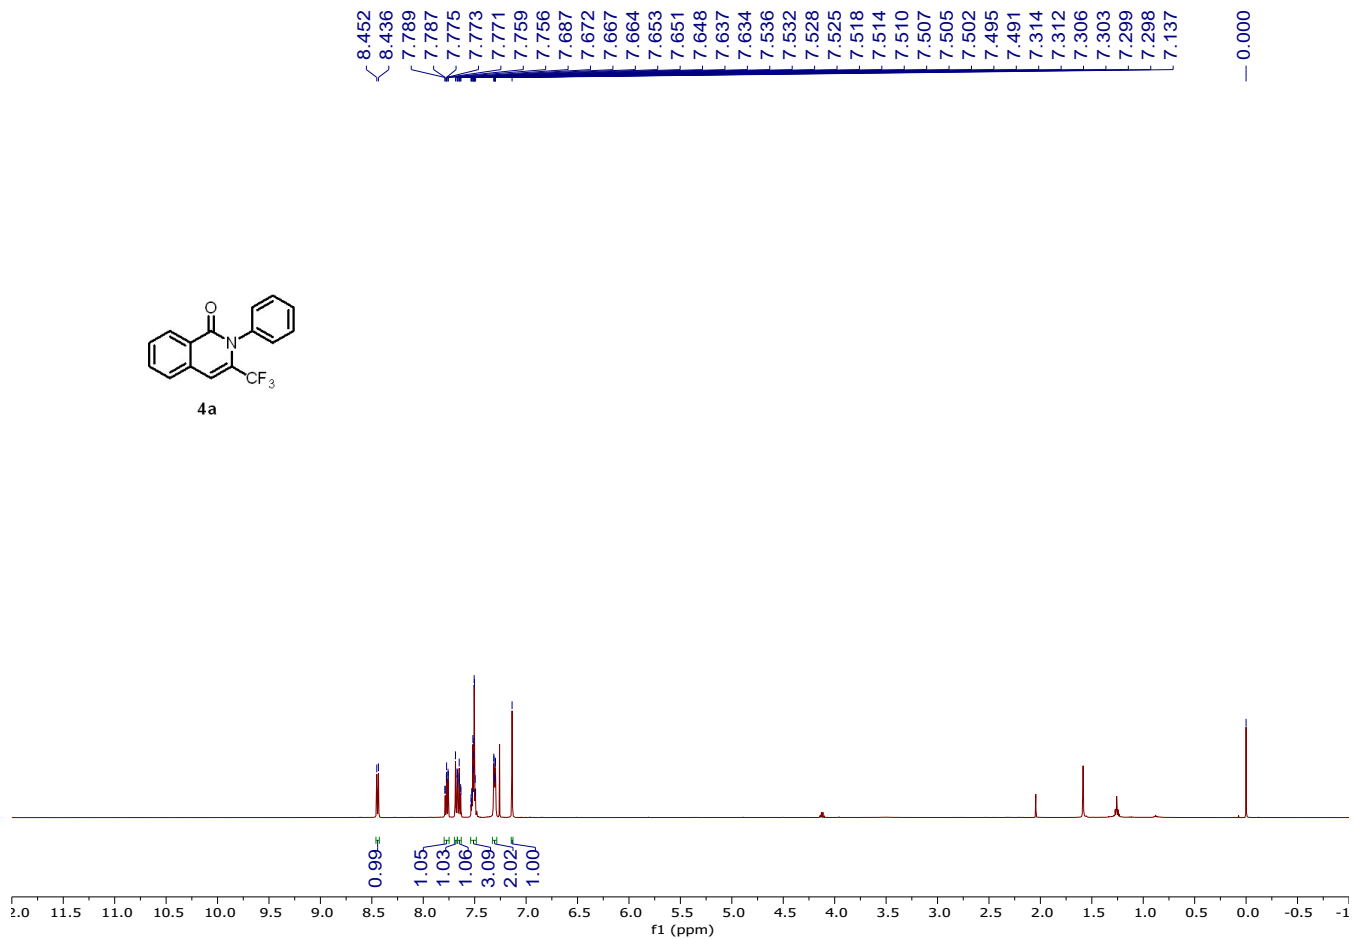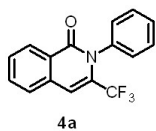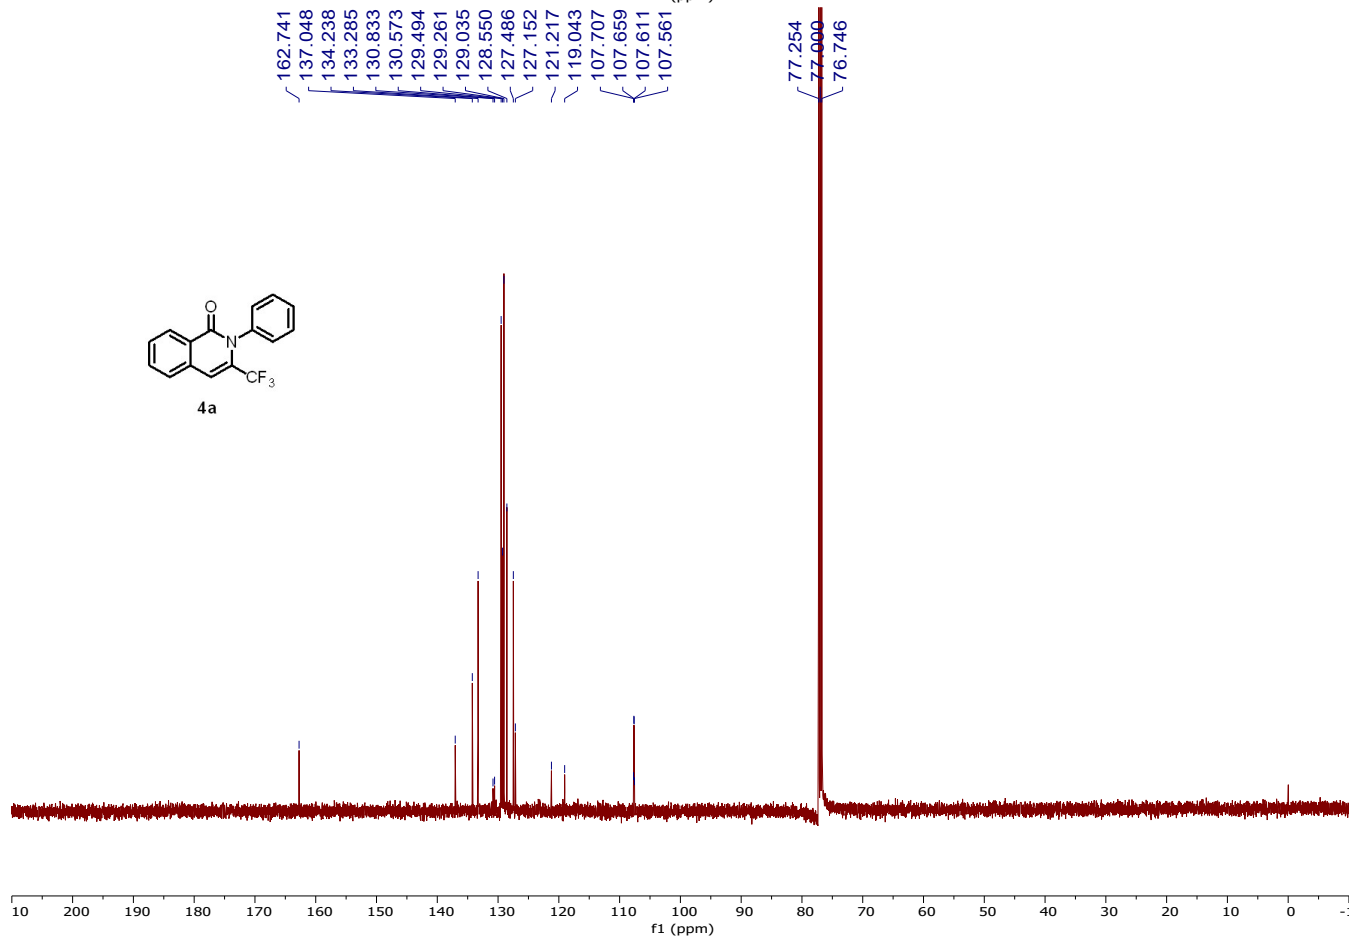

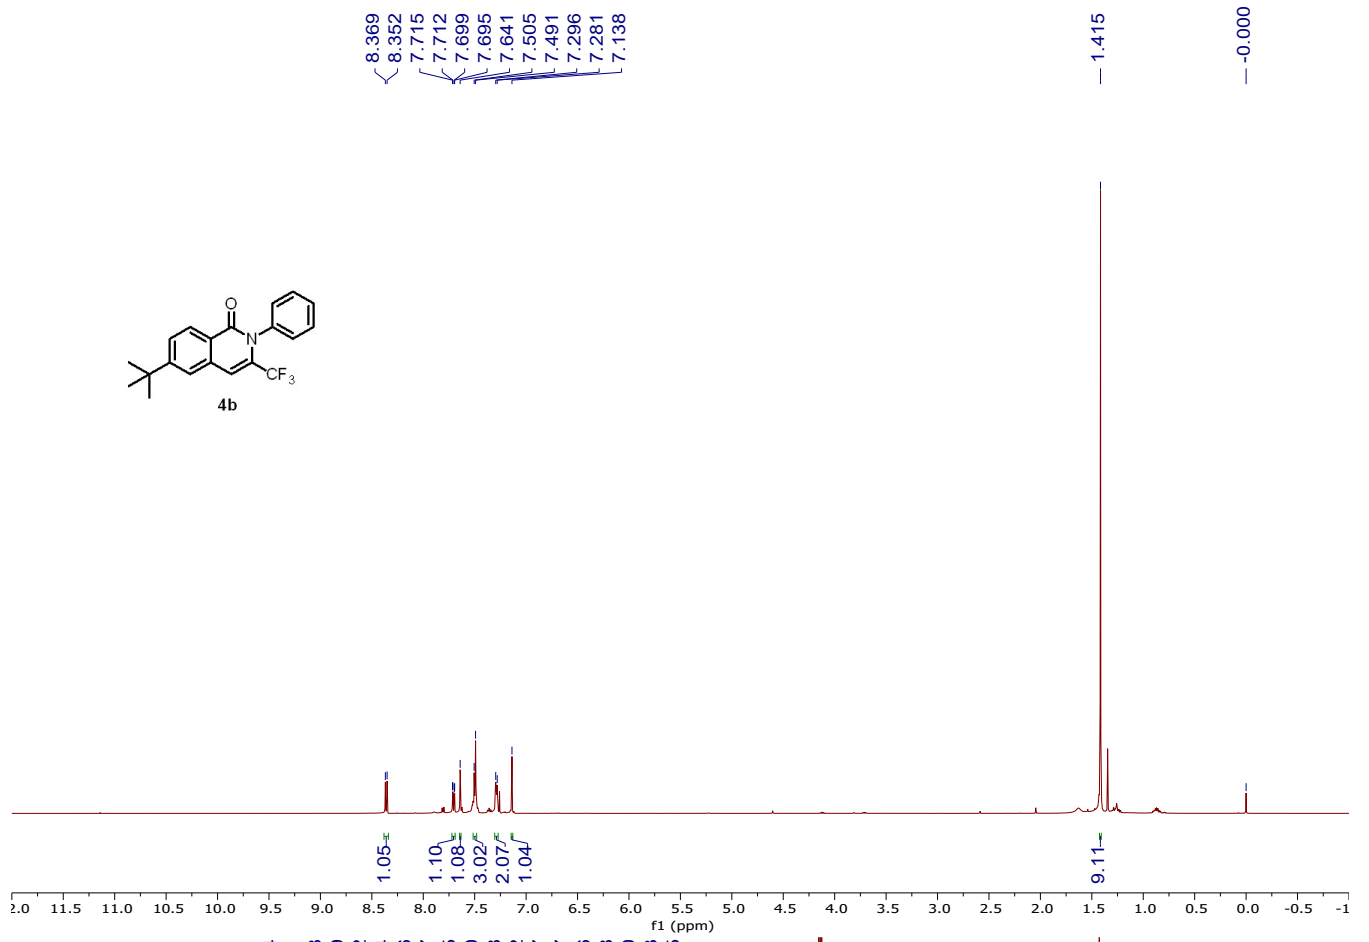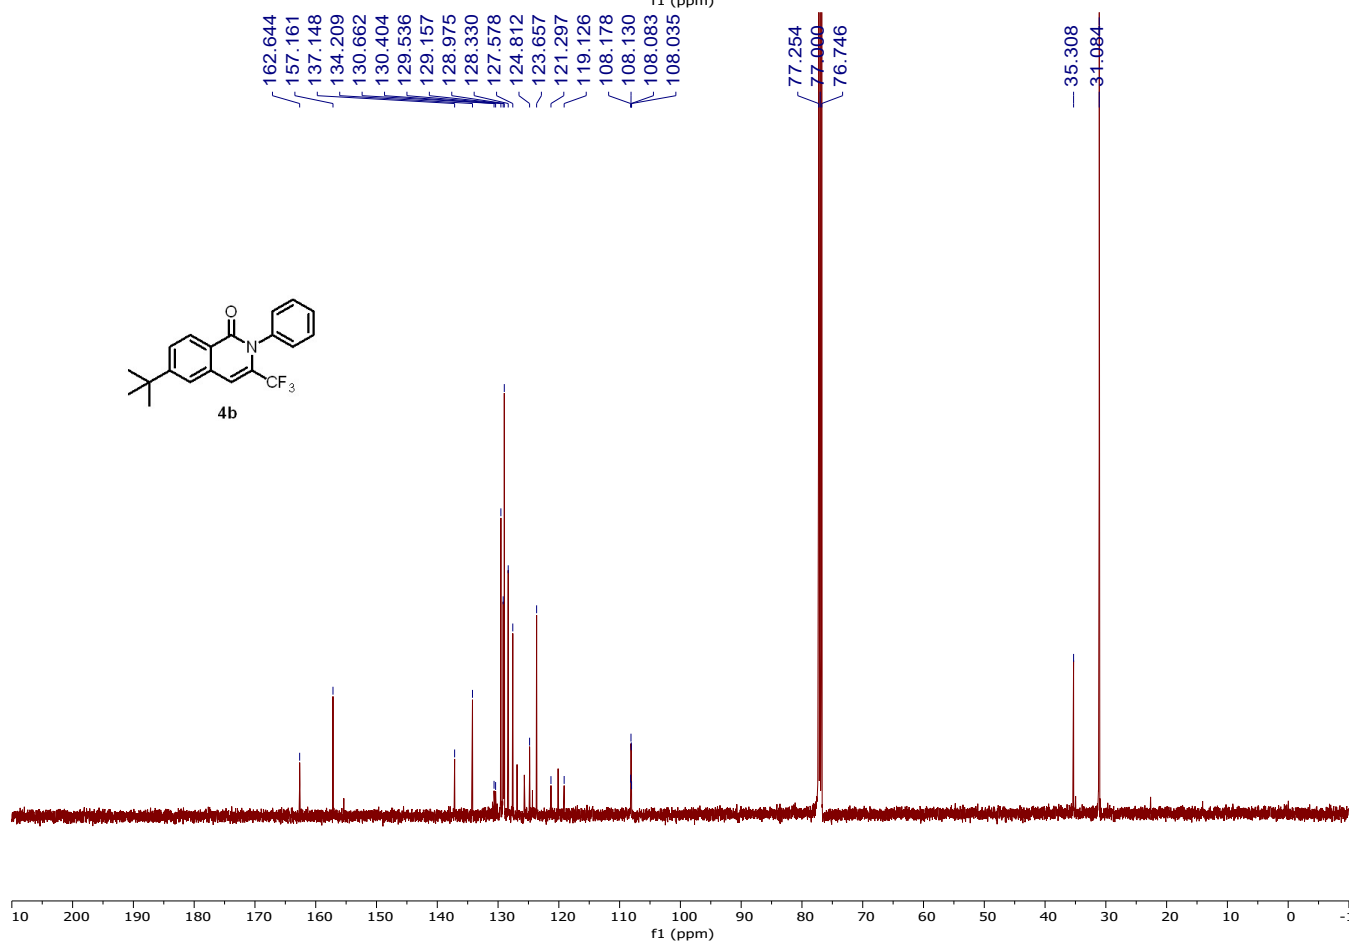

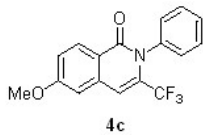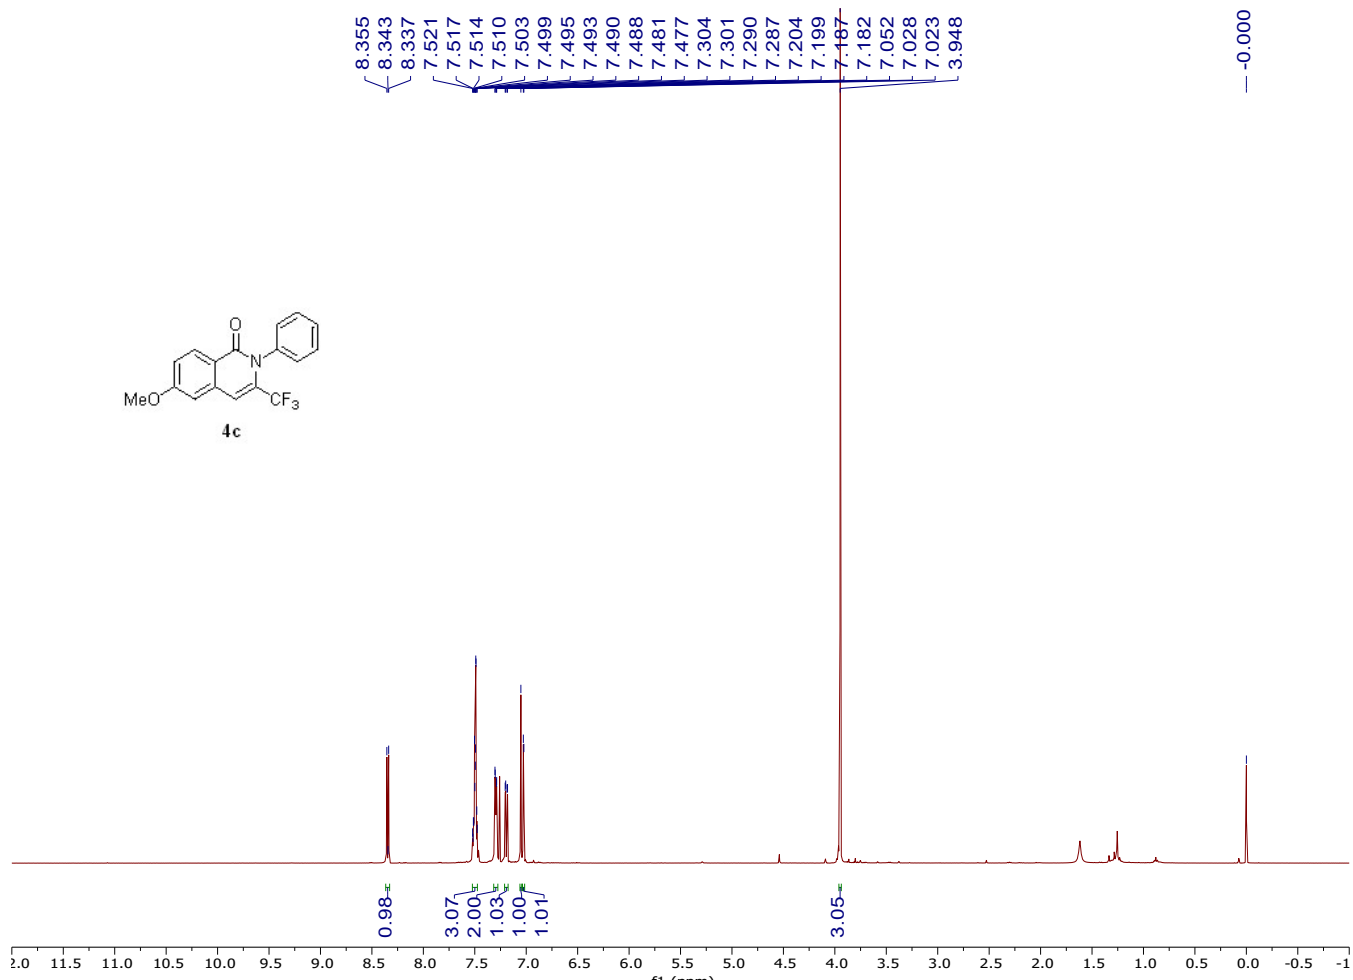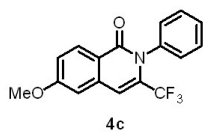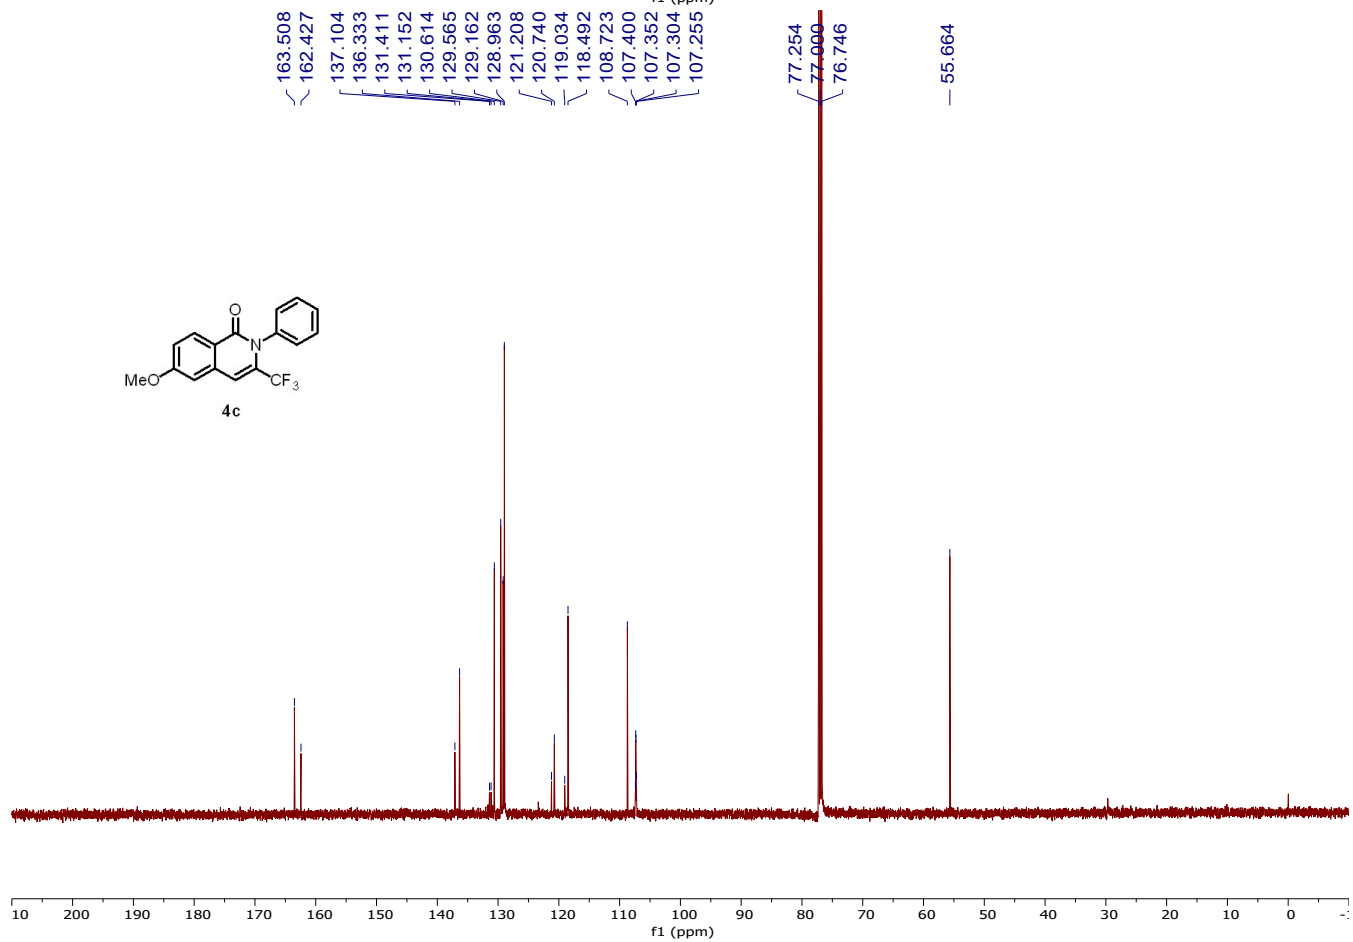

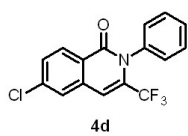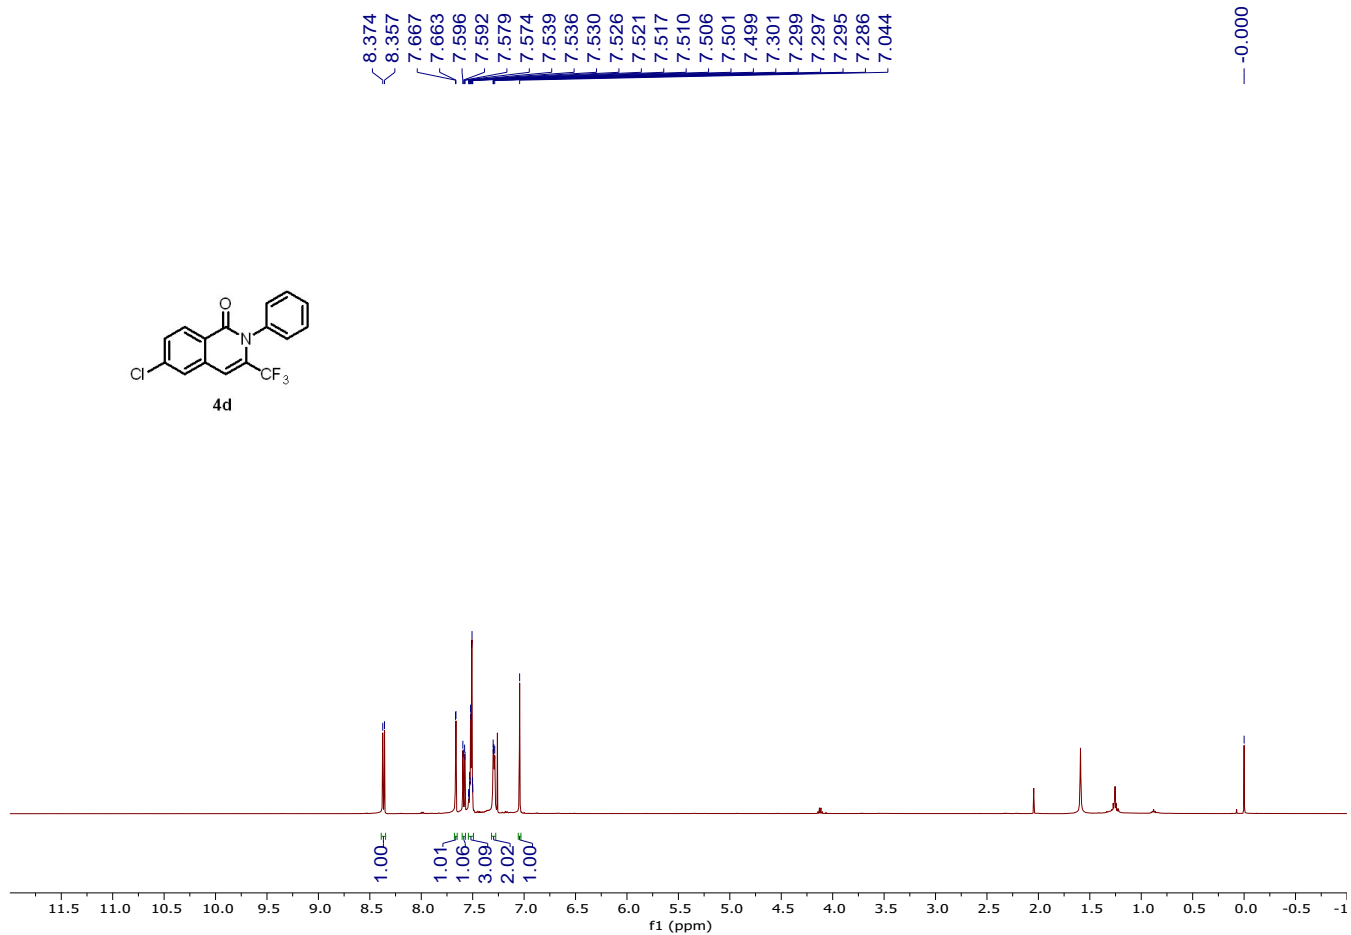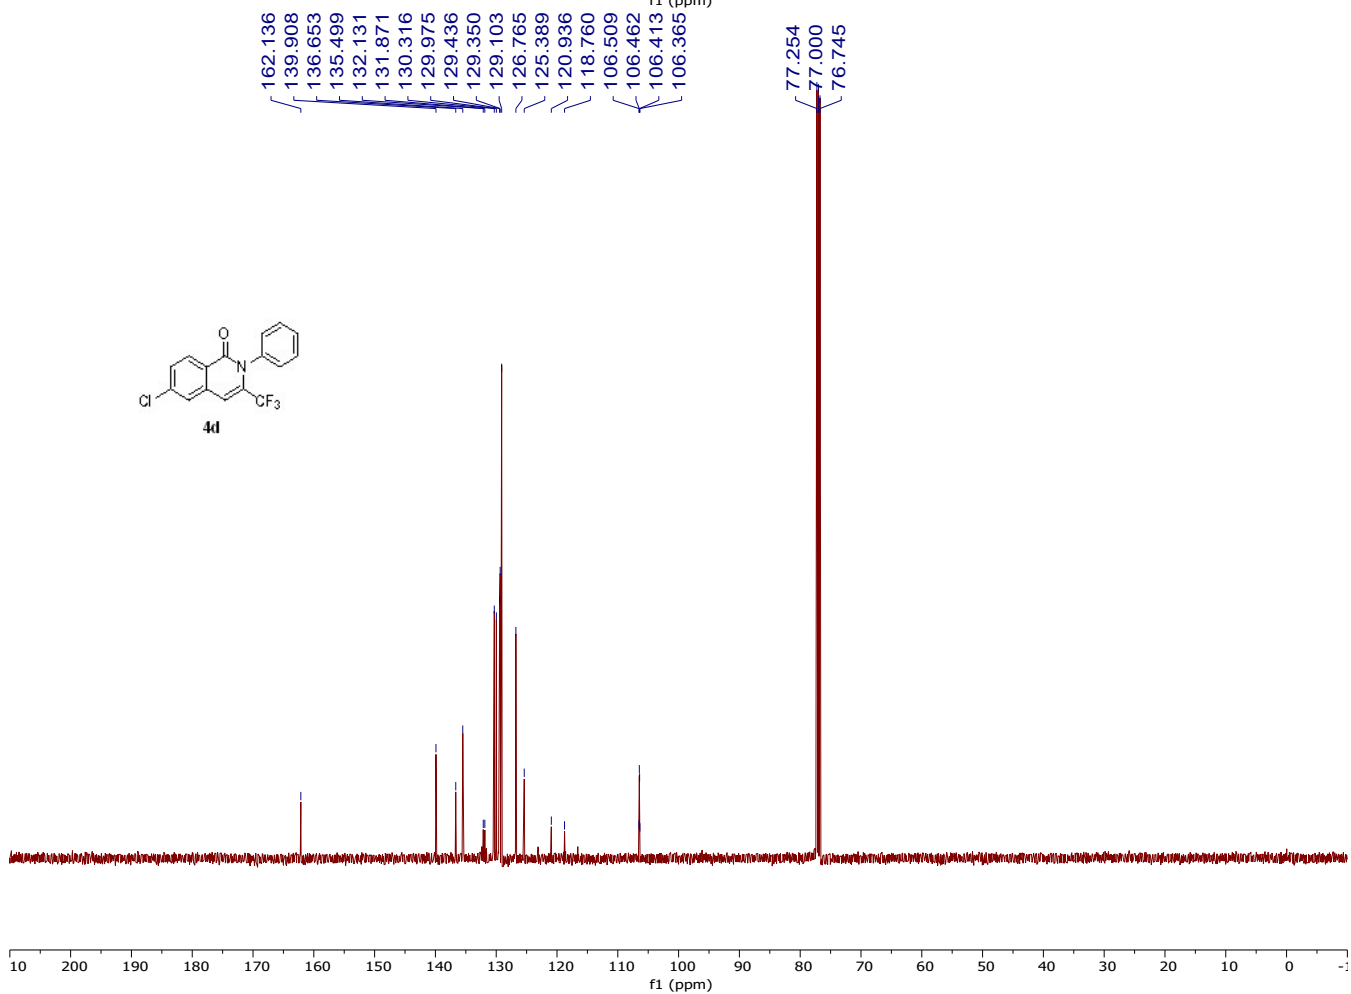

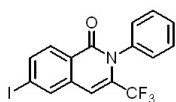

4e

8.123  
8.106  
8.075  
8.072  
7.951  
7.947  
7.934  
7.931  
7.534  
7.526  
7.523  
7.517  
7.514  
7.507  
7.503  
7.499  
7.495  
7.296  
7.291  
7.289  
7.280  
7.009

0.000

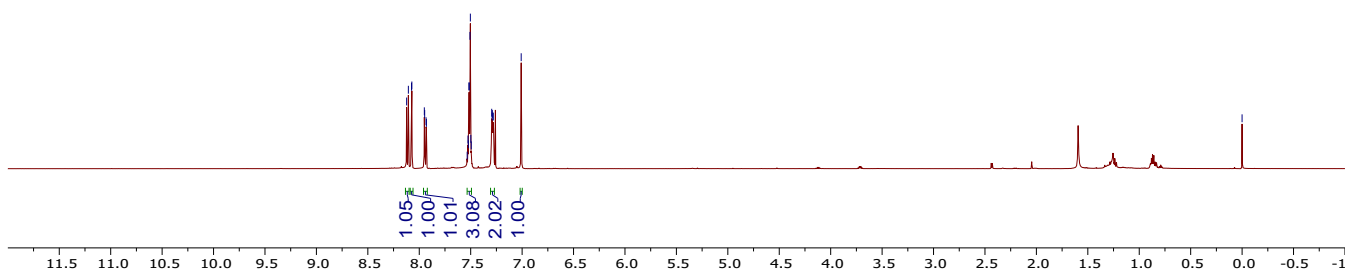

162.456  
138.465  
136.659  
136.202  
135.594  
131.882  
131.622  
129.930  
129.428  
129.326  
129.097  
126.209  
120.906  
118.730  
106.189  
106.141  
106.094  
106.045  
101.056

77.254  
77.000  
76.746

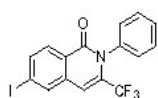

4e

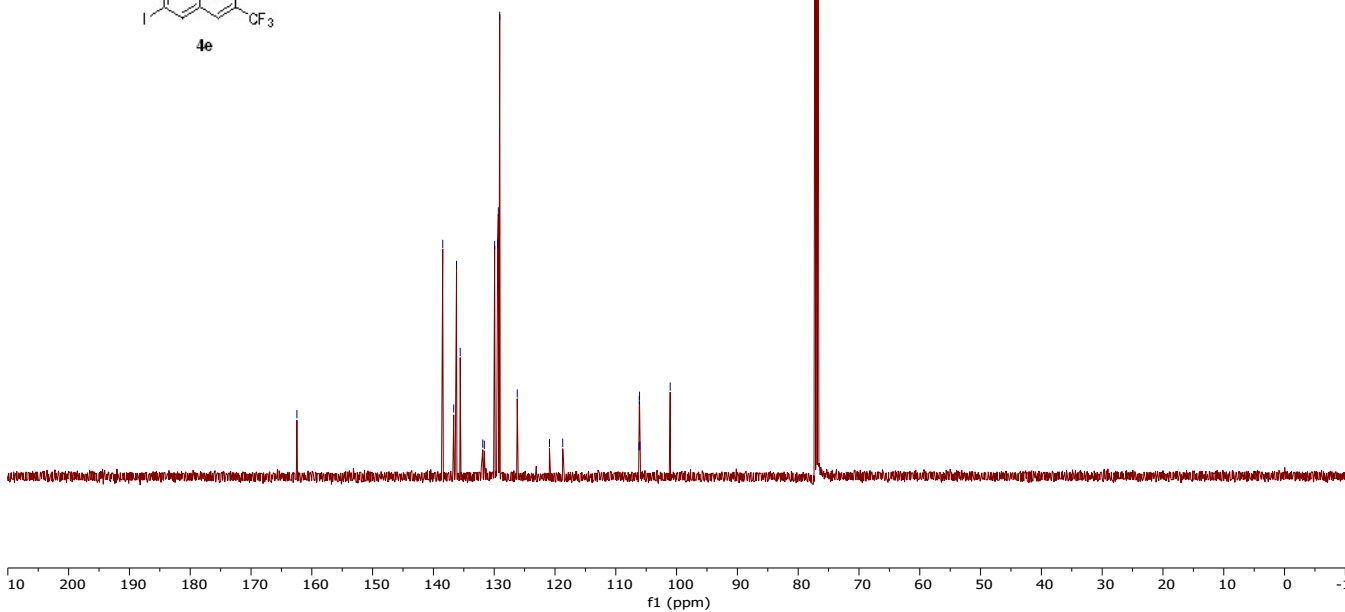



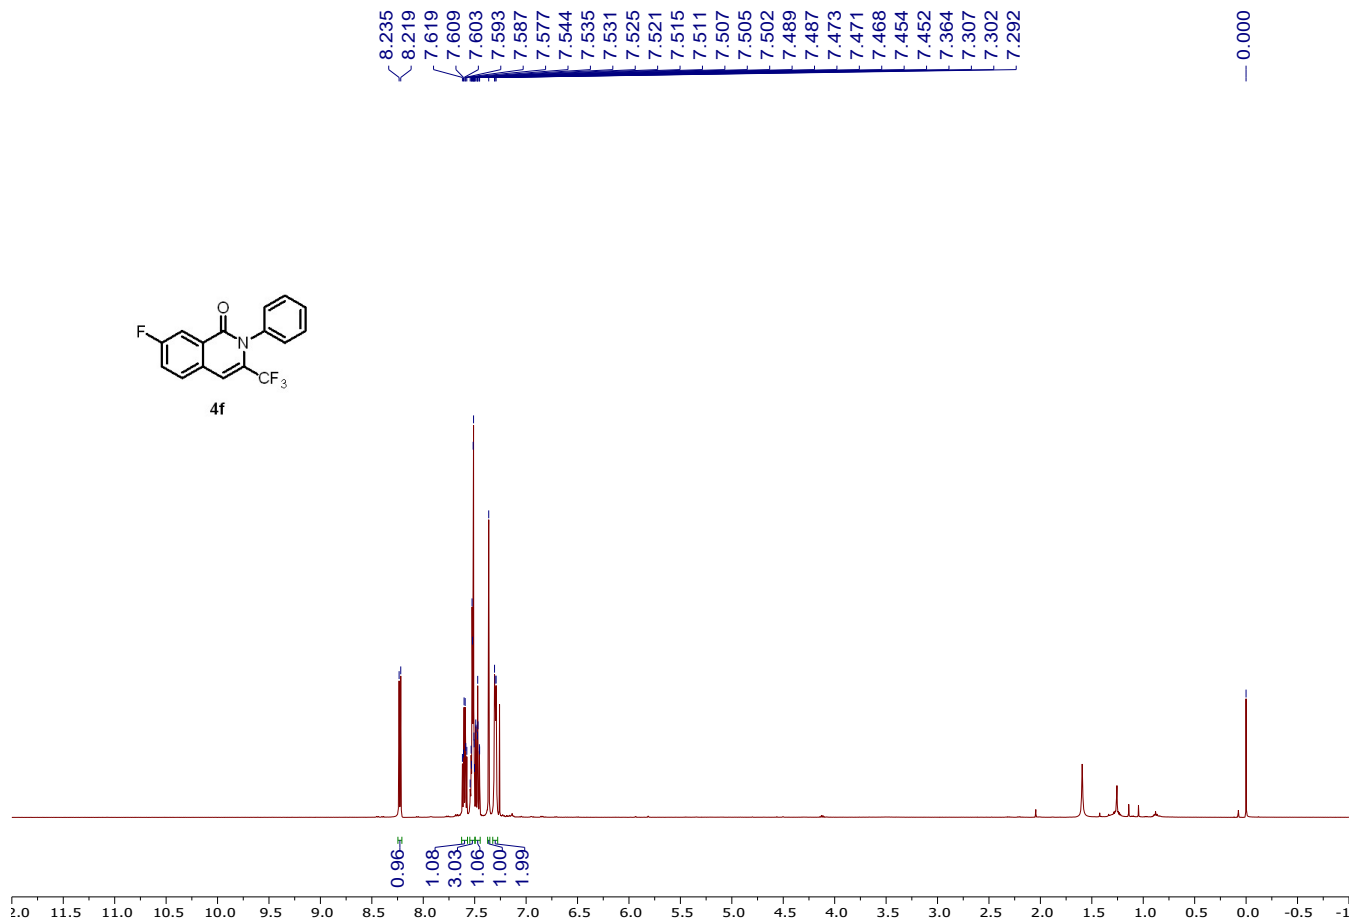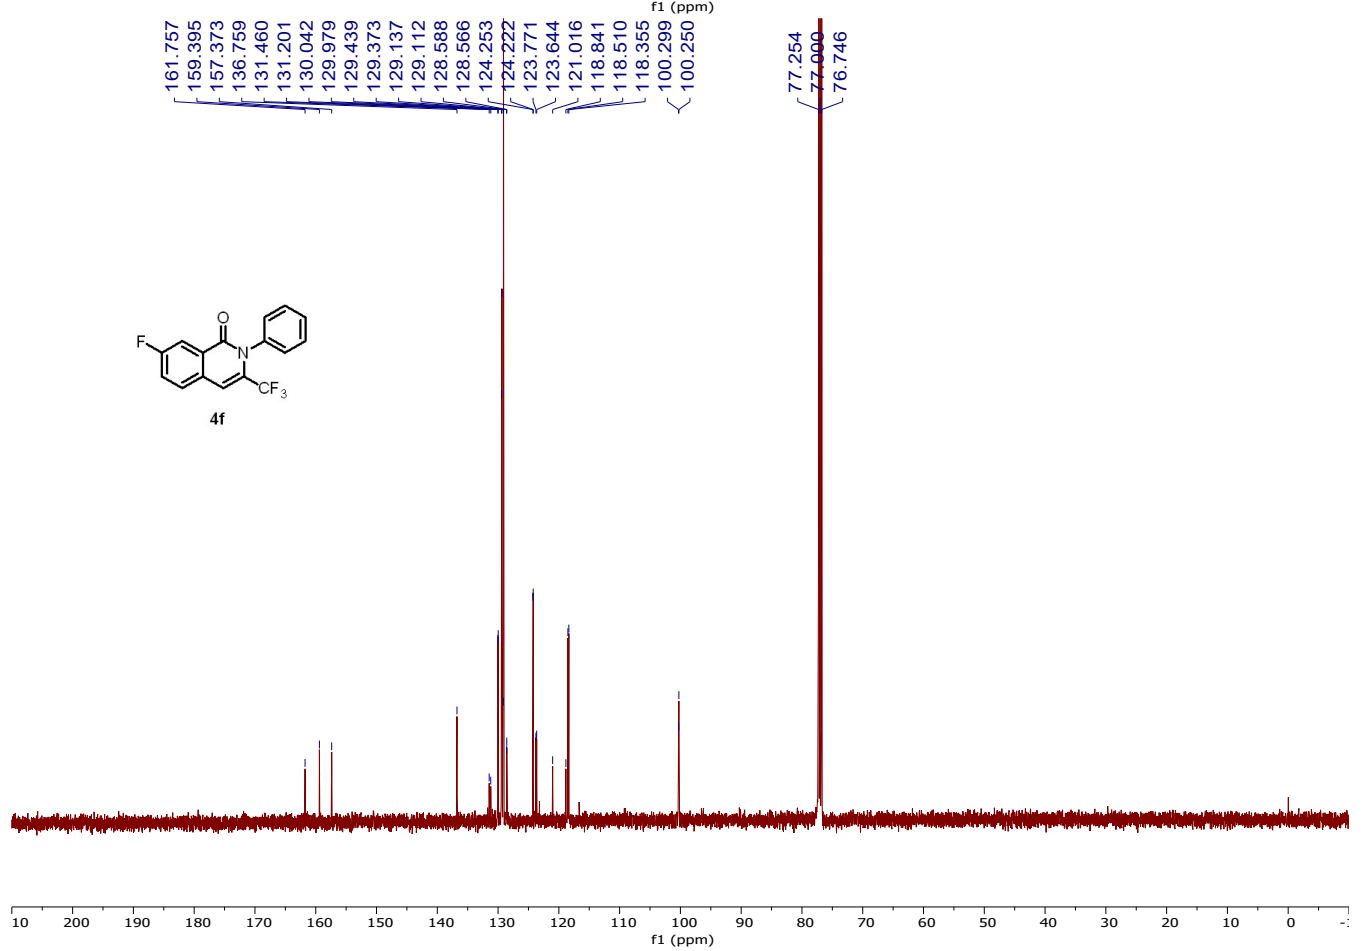

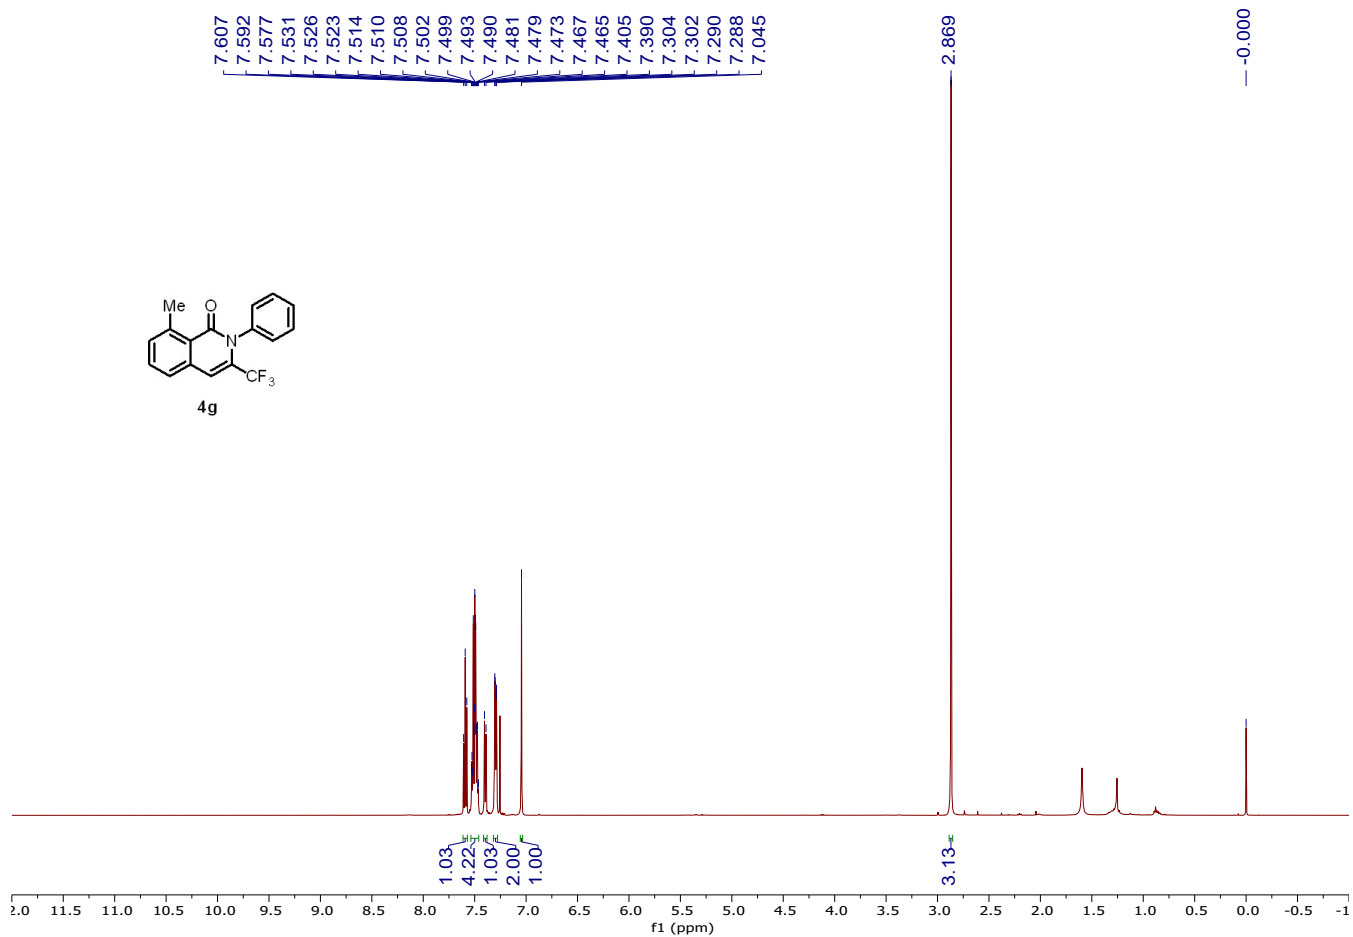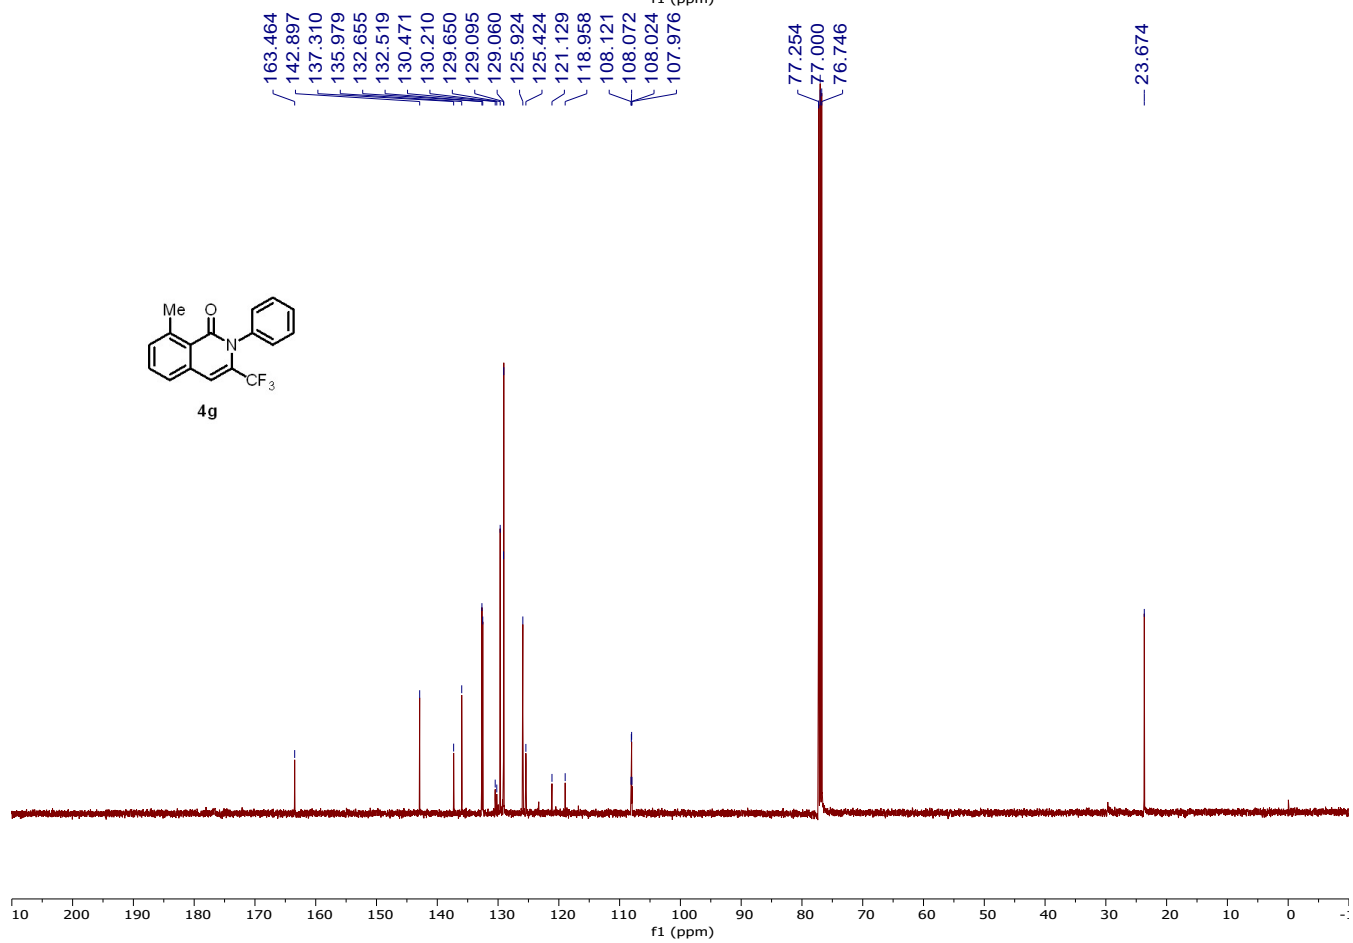

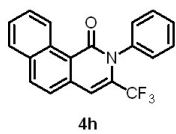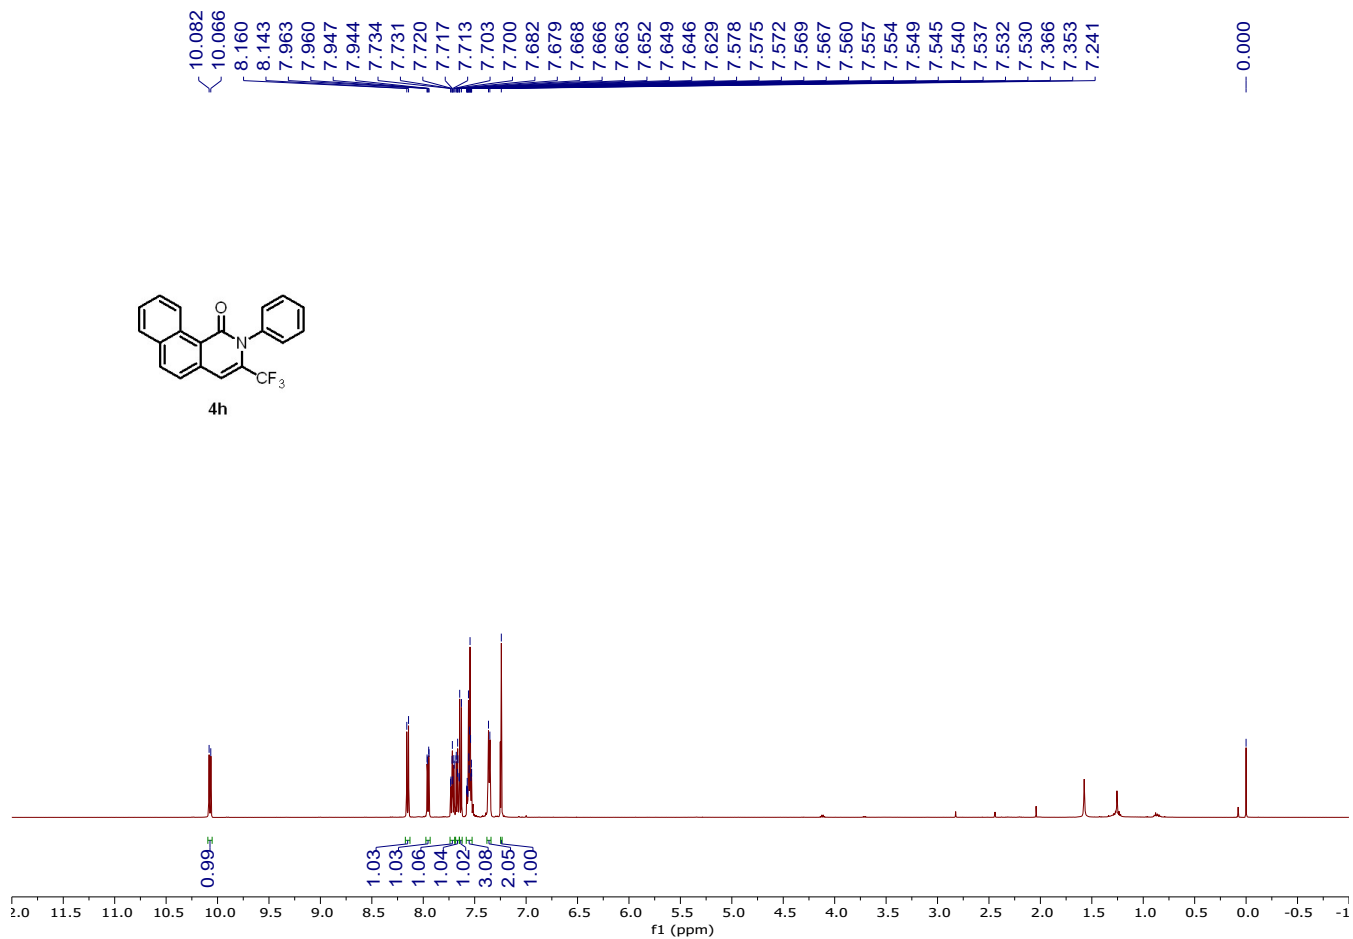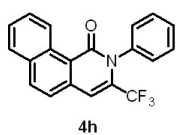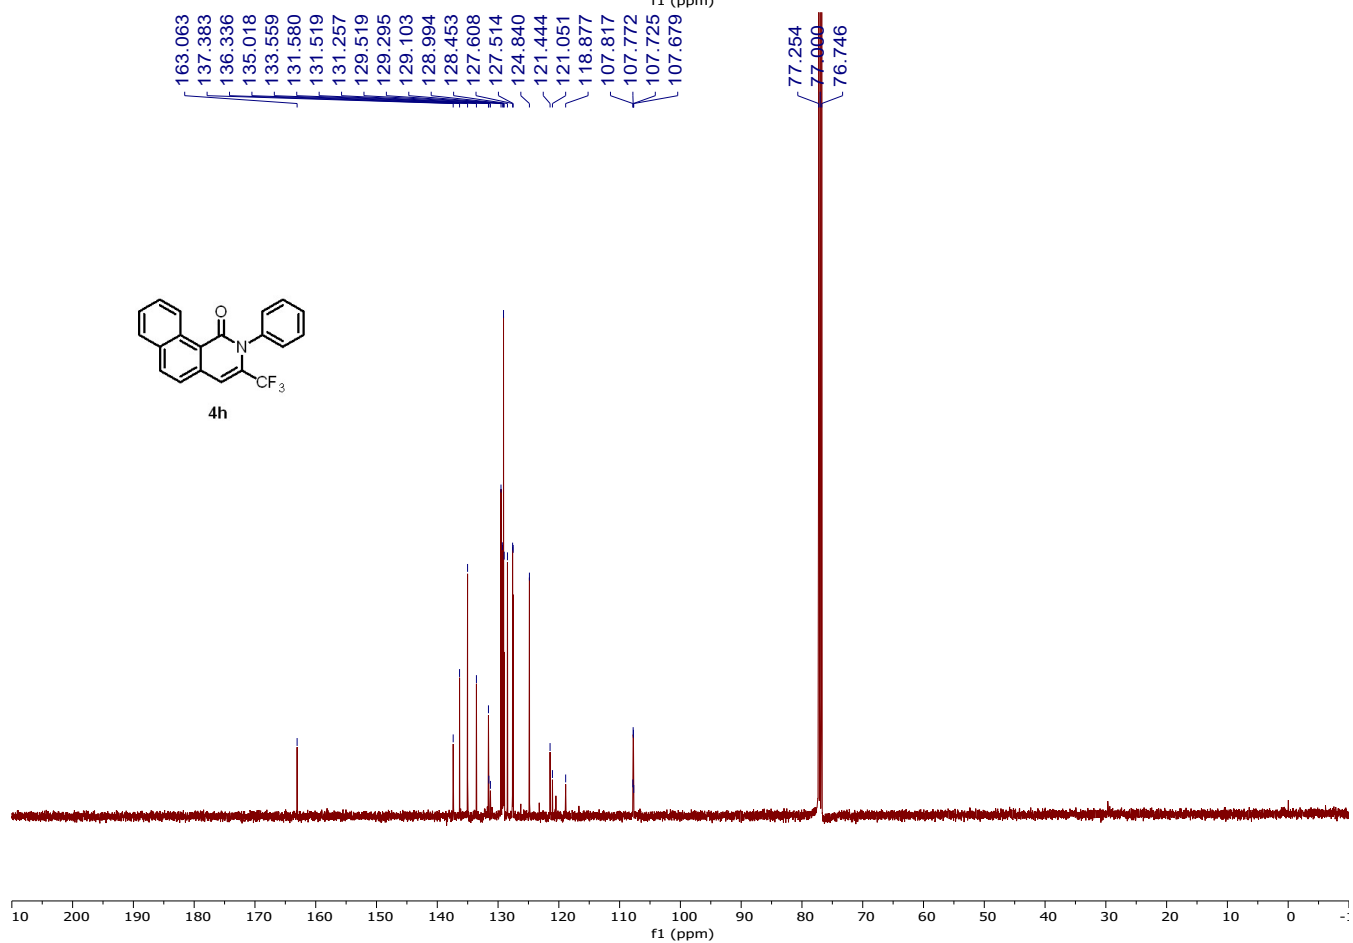

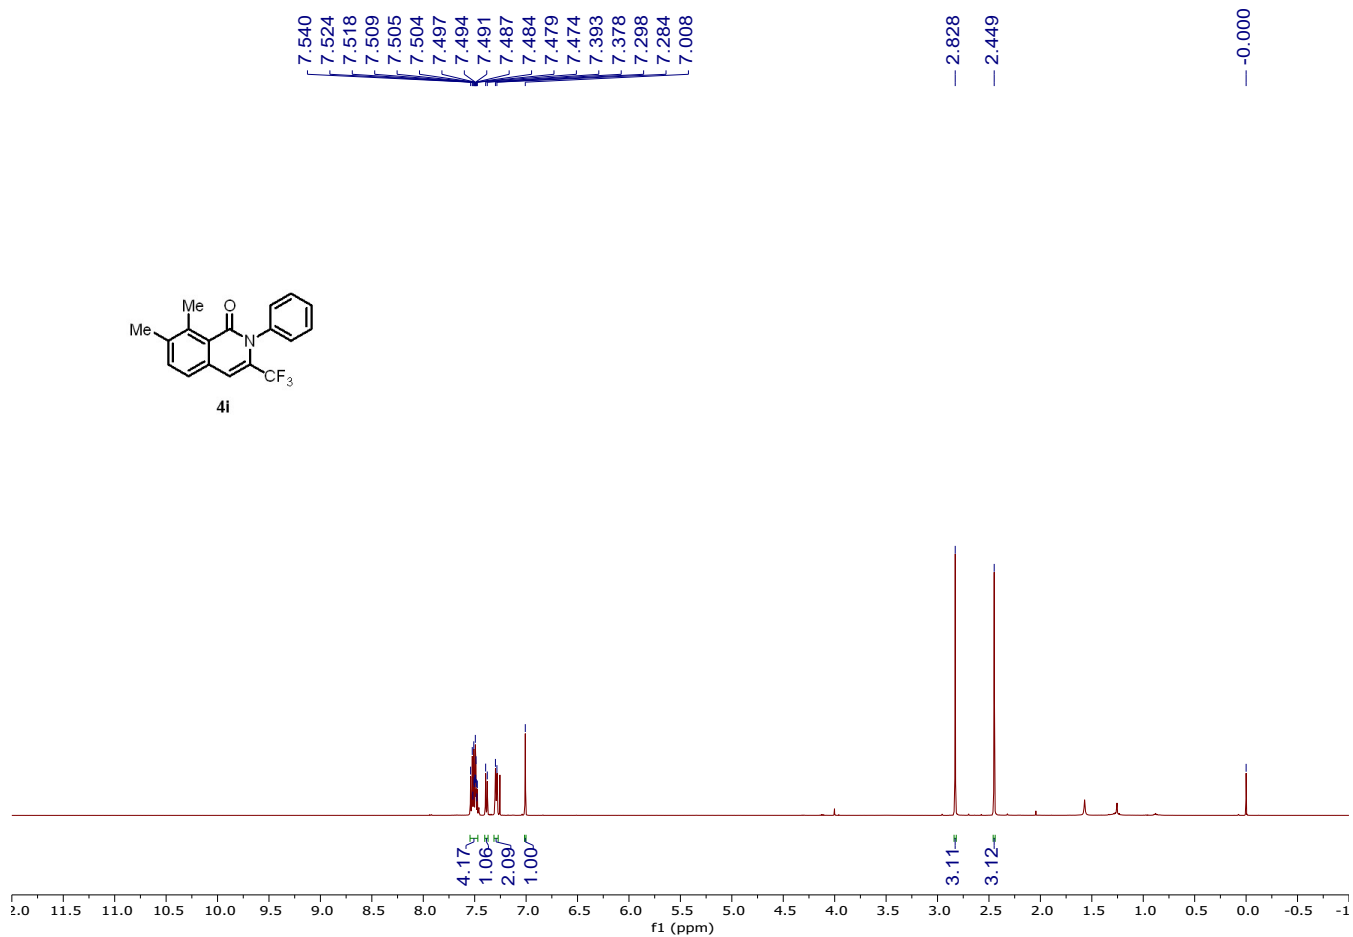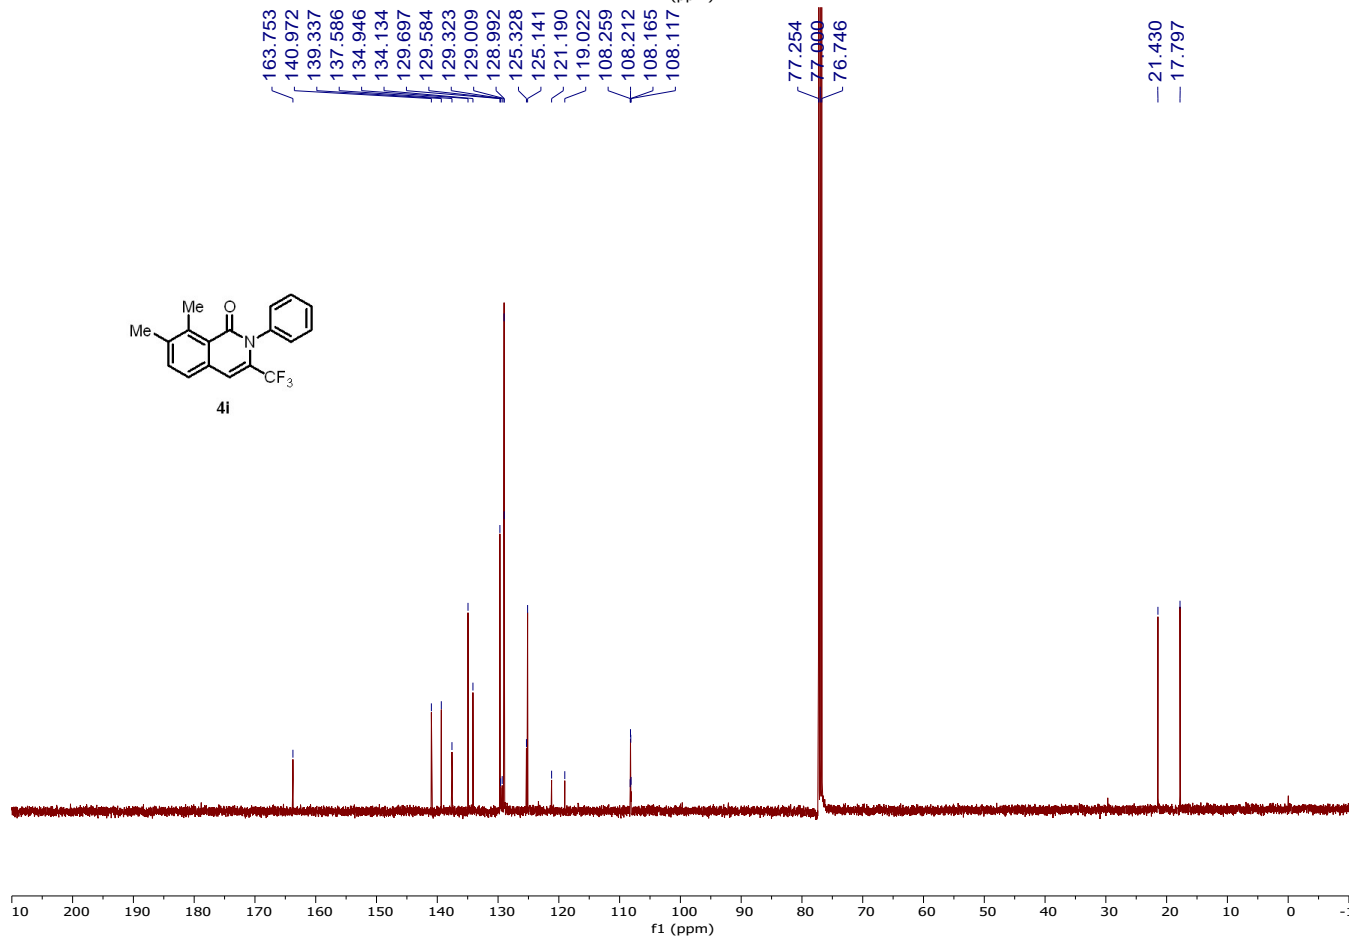

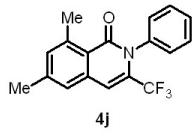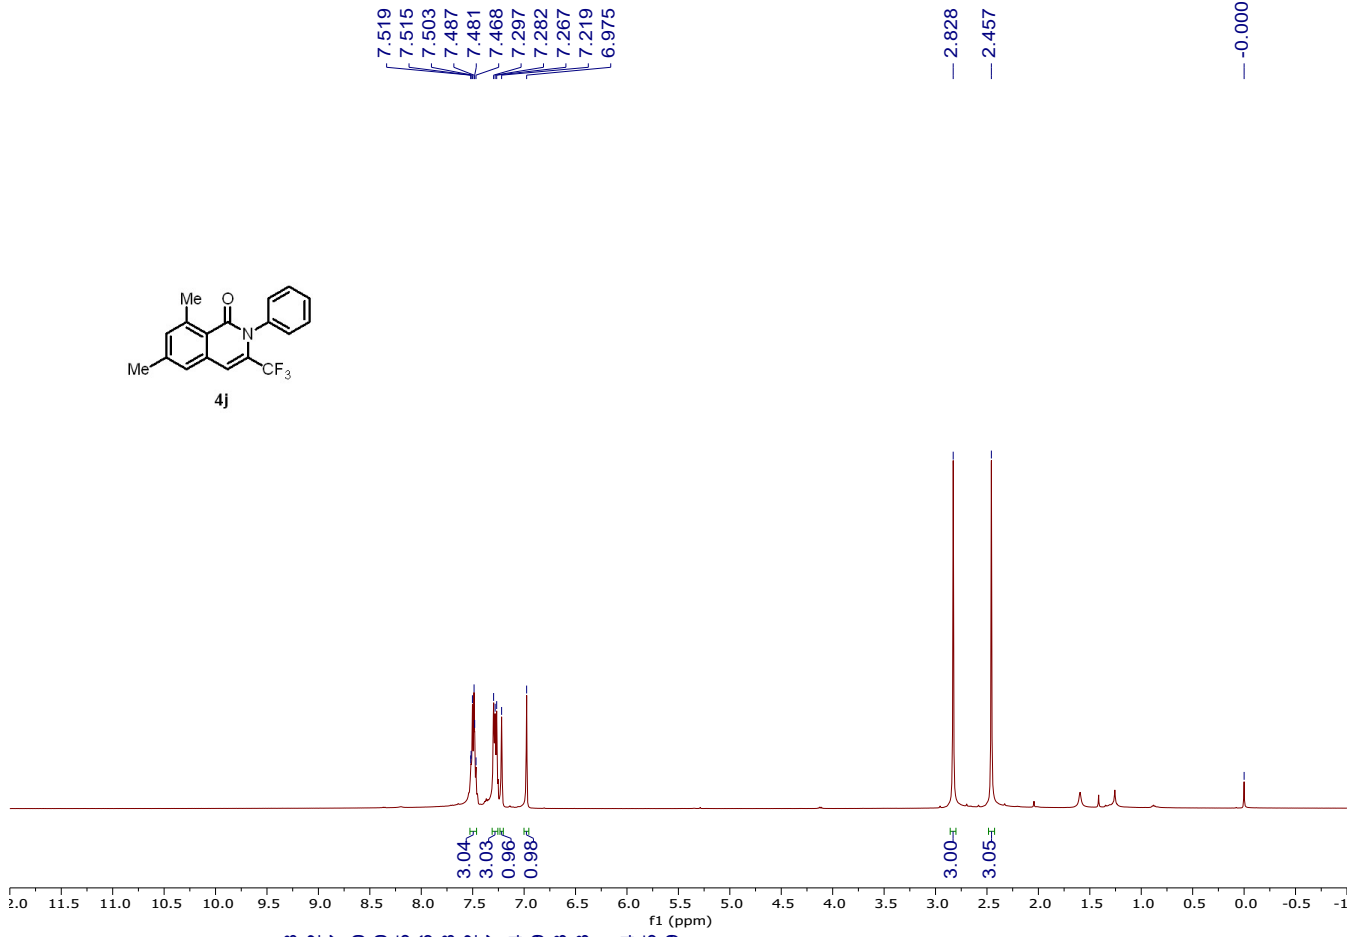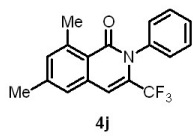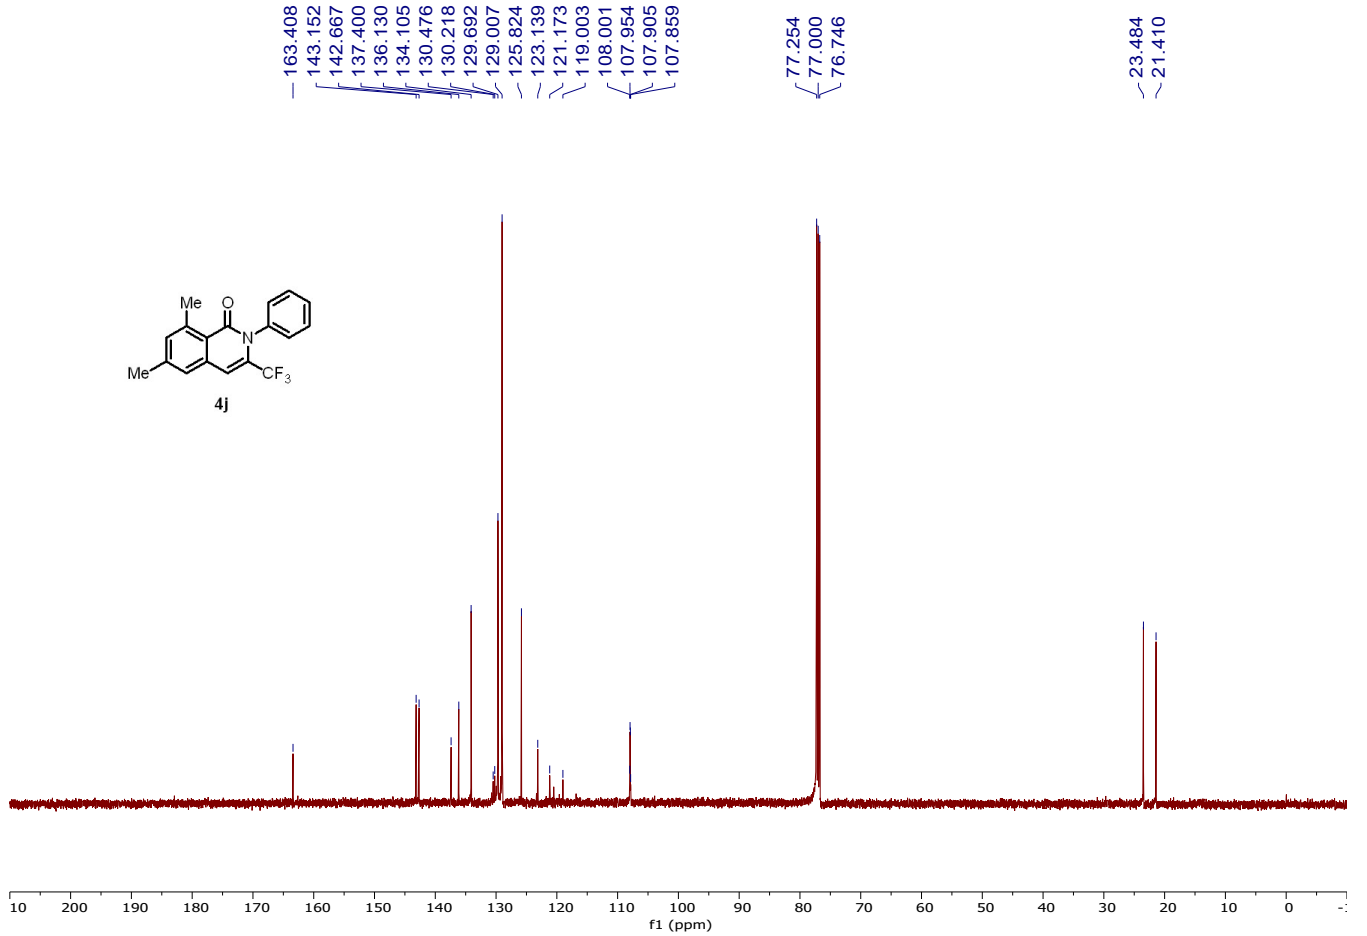

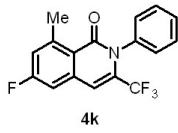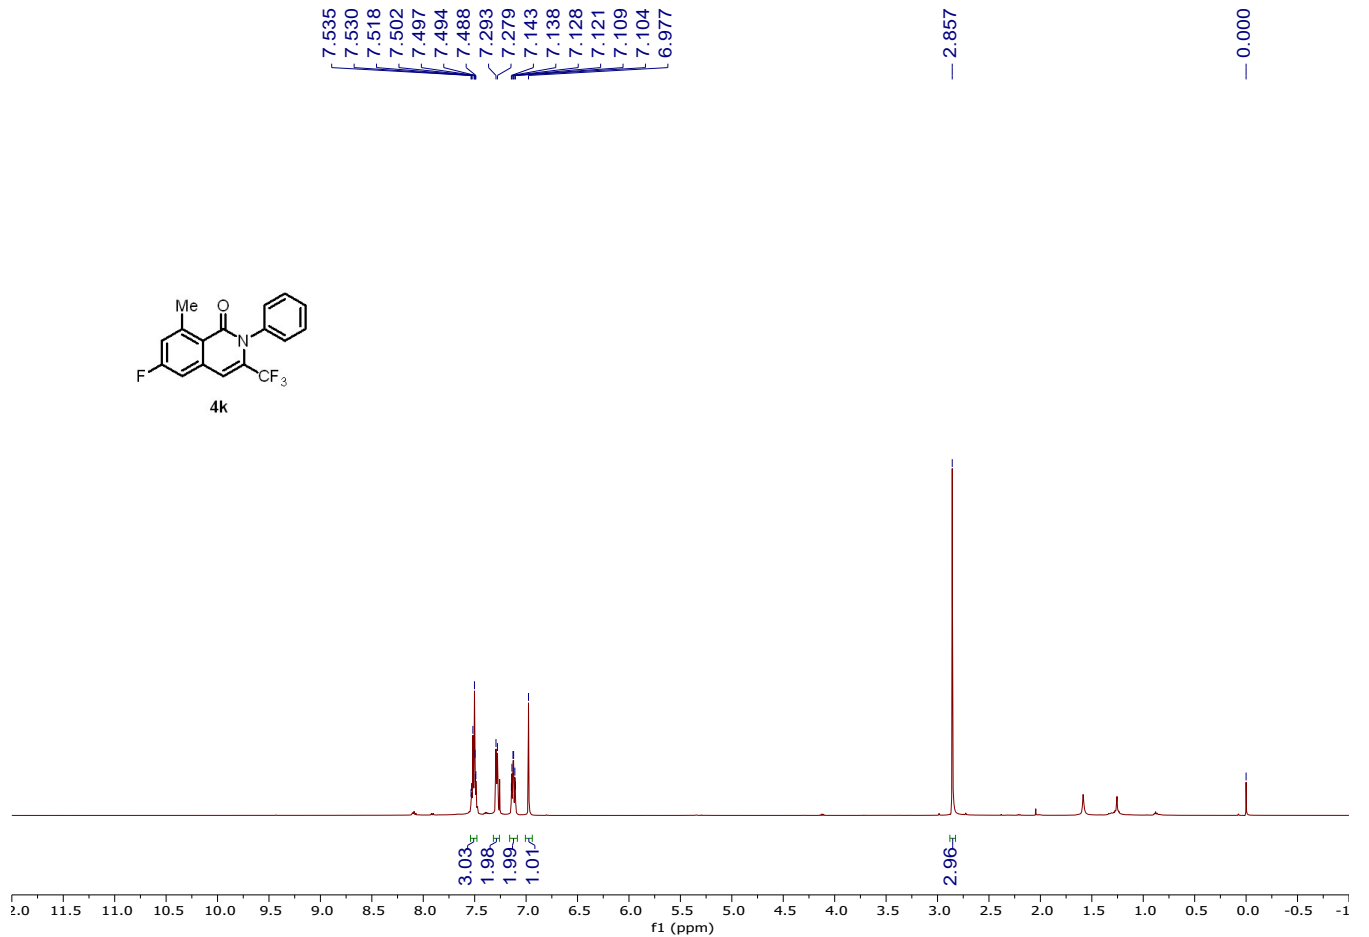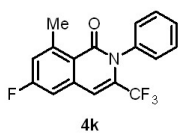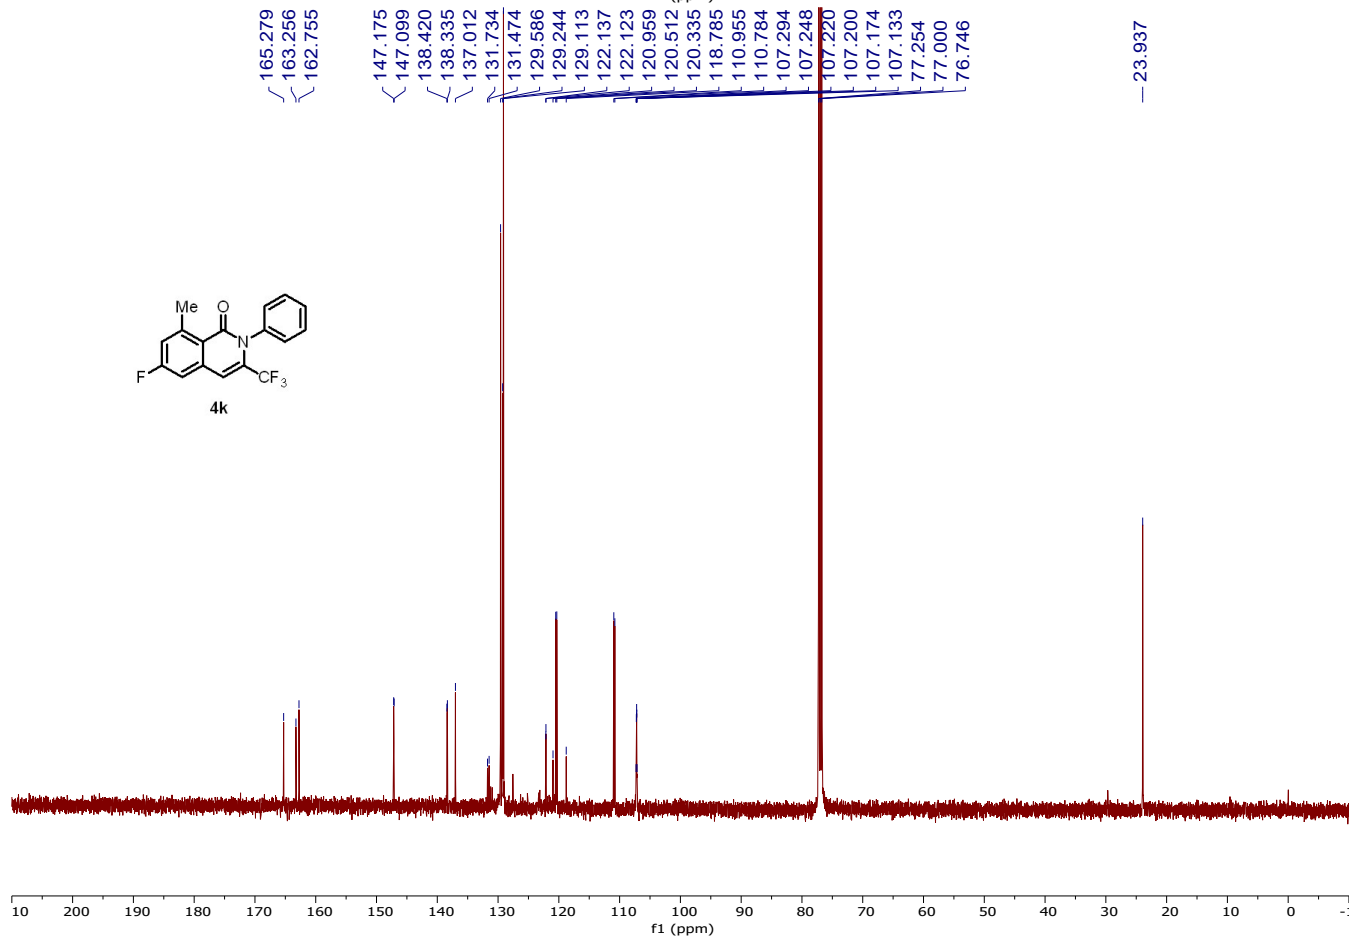

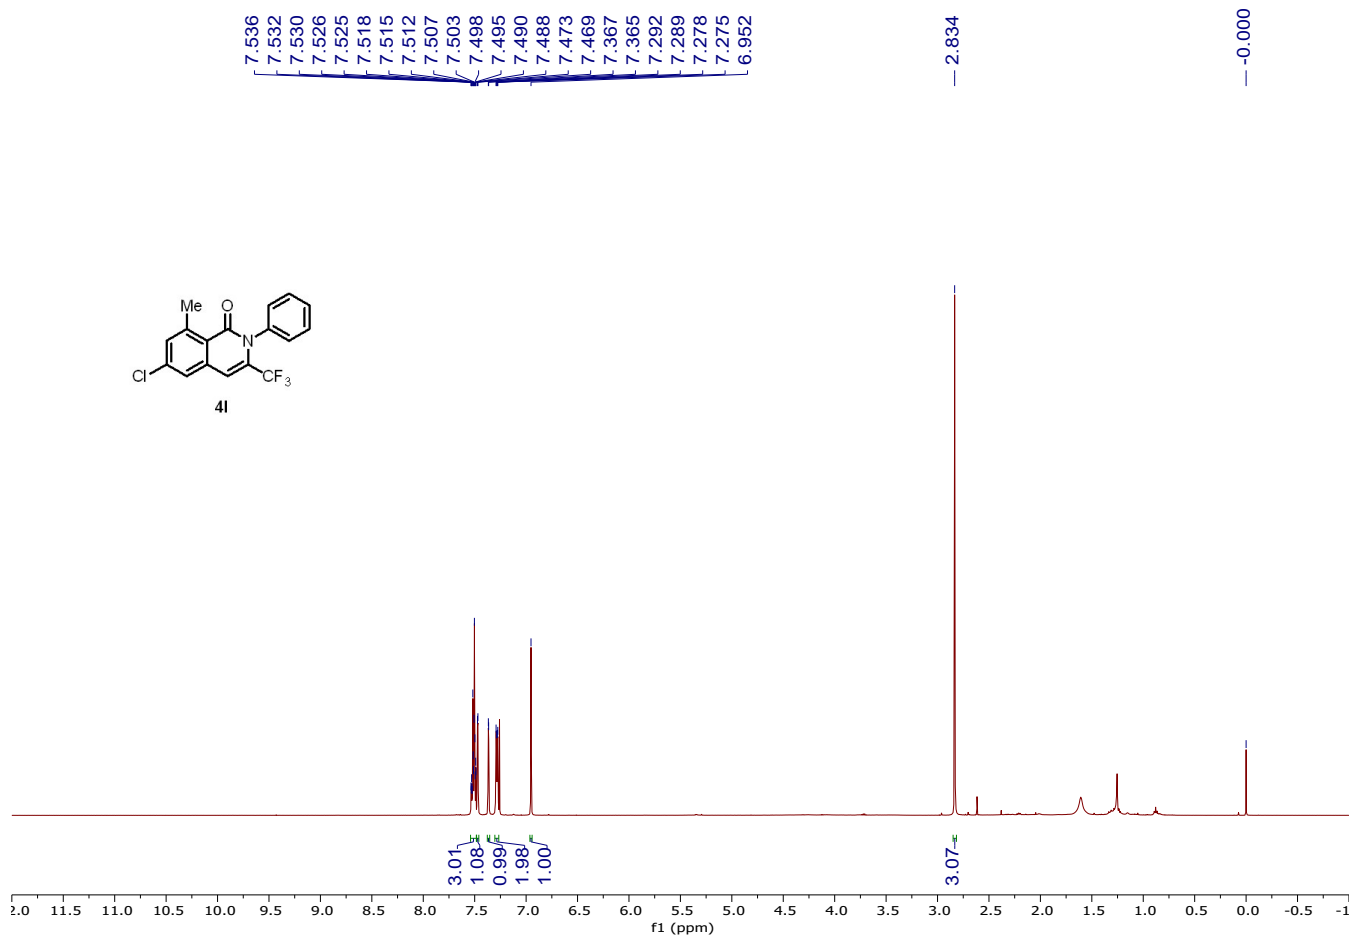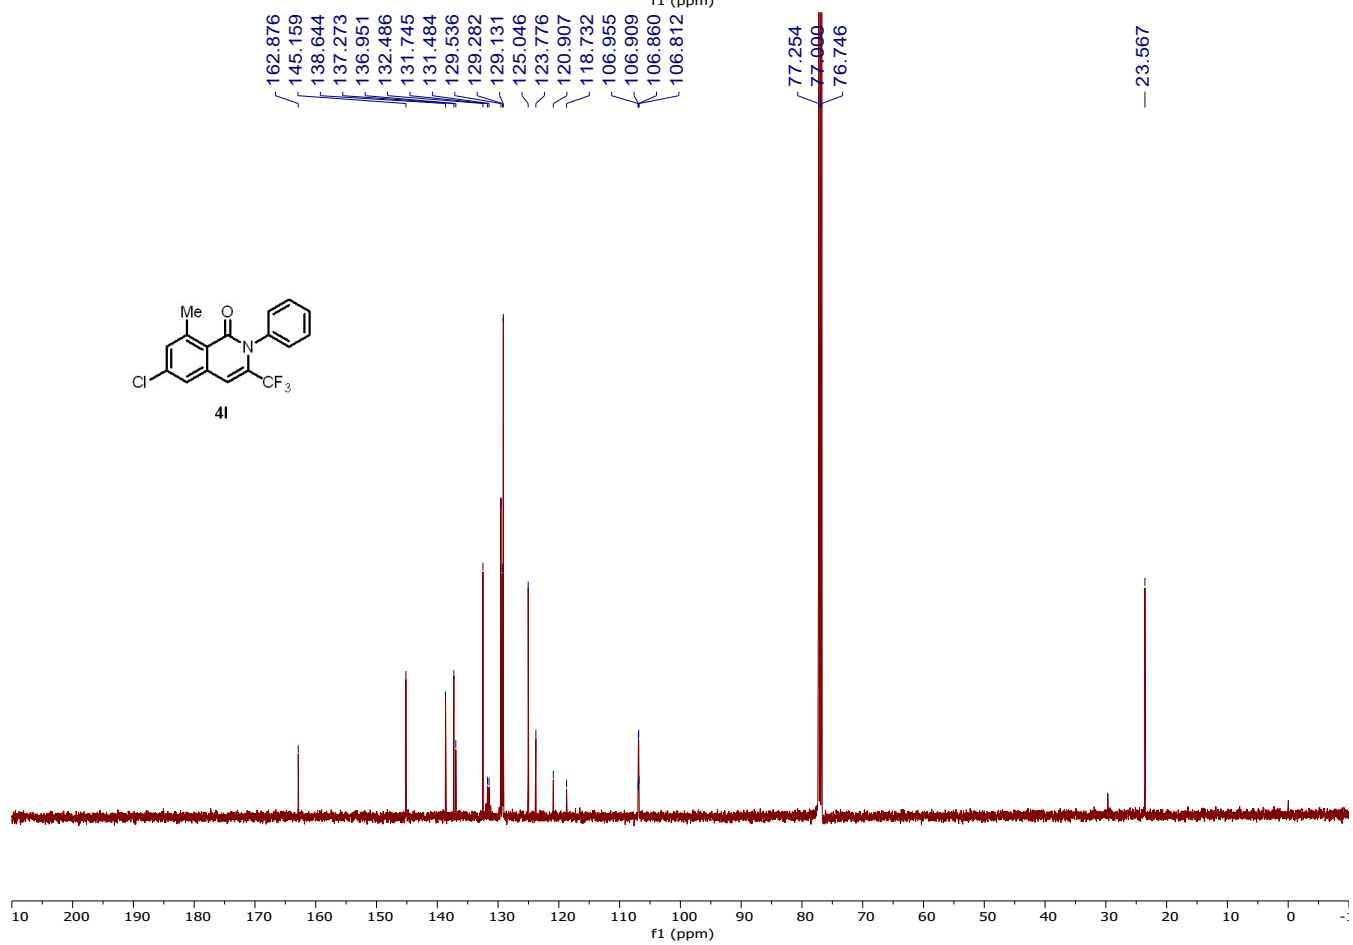

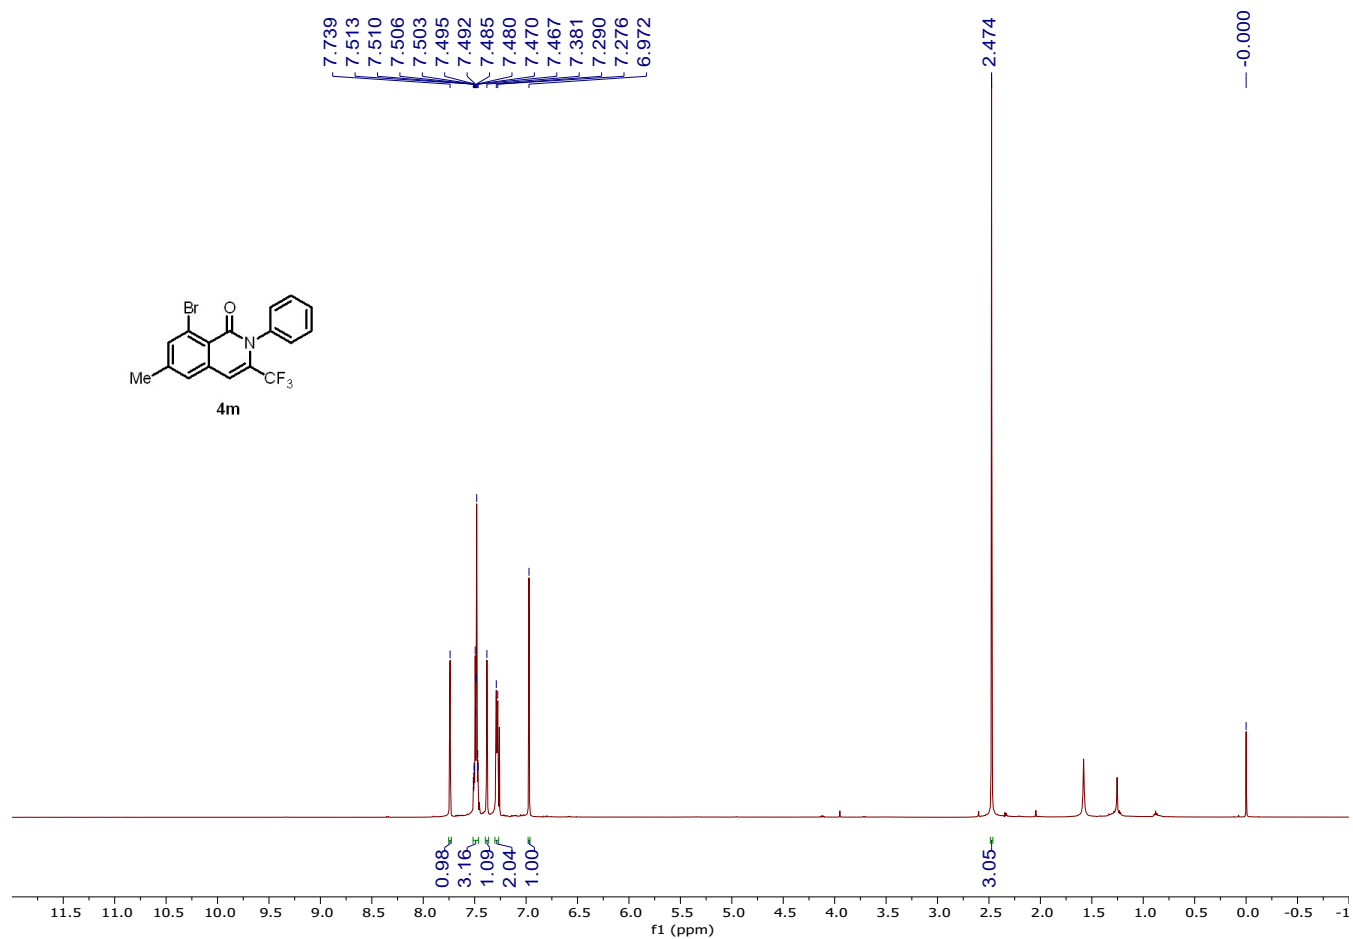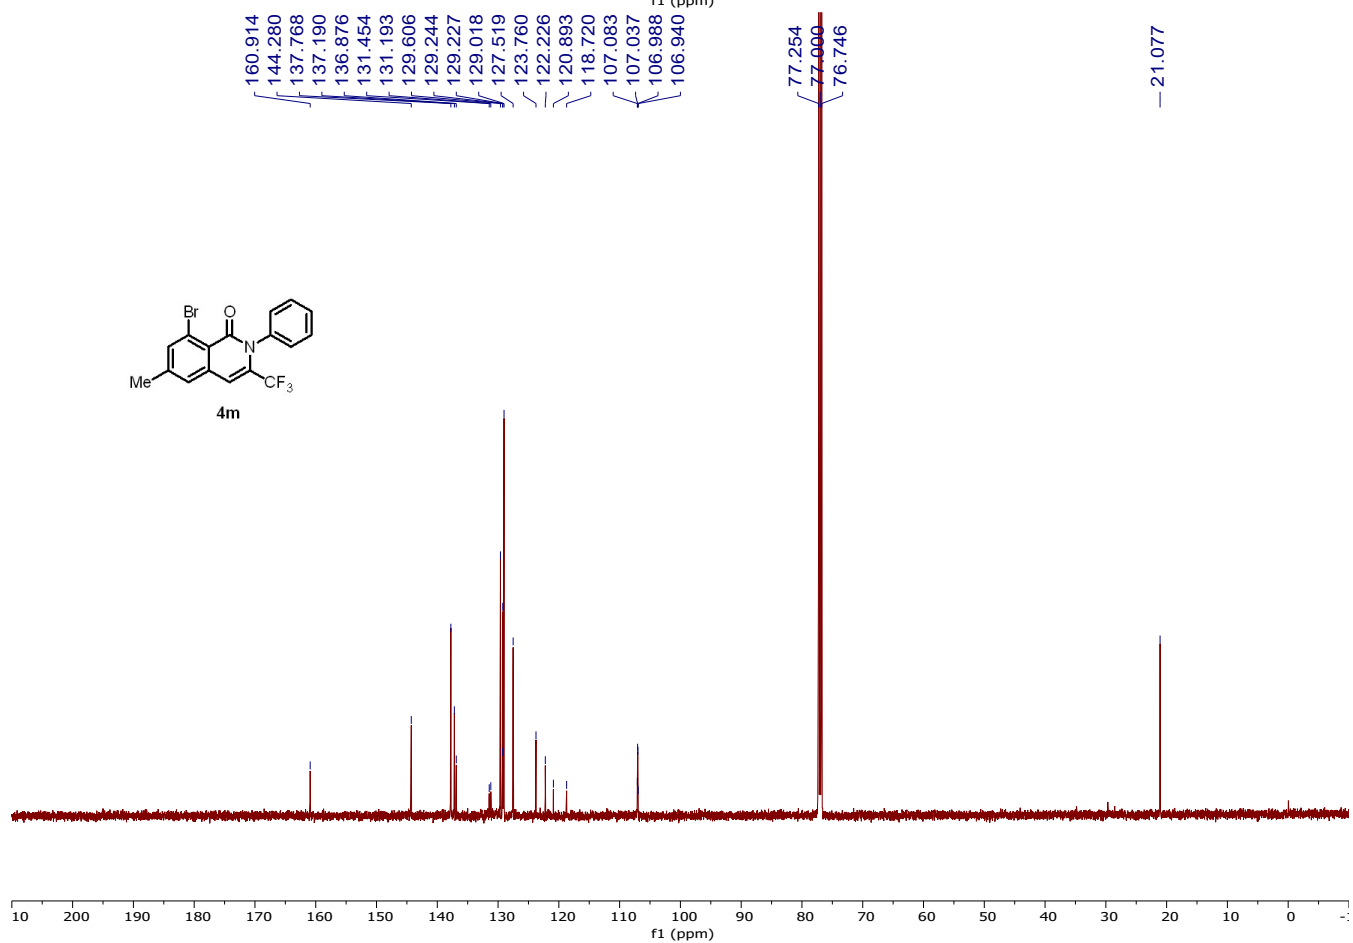



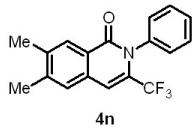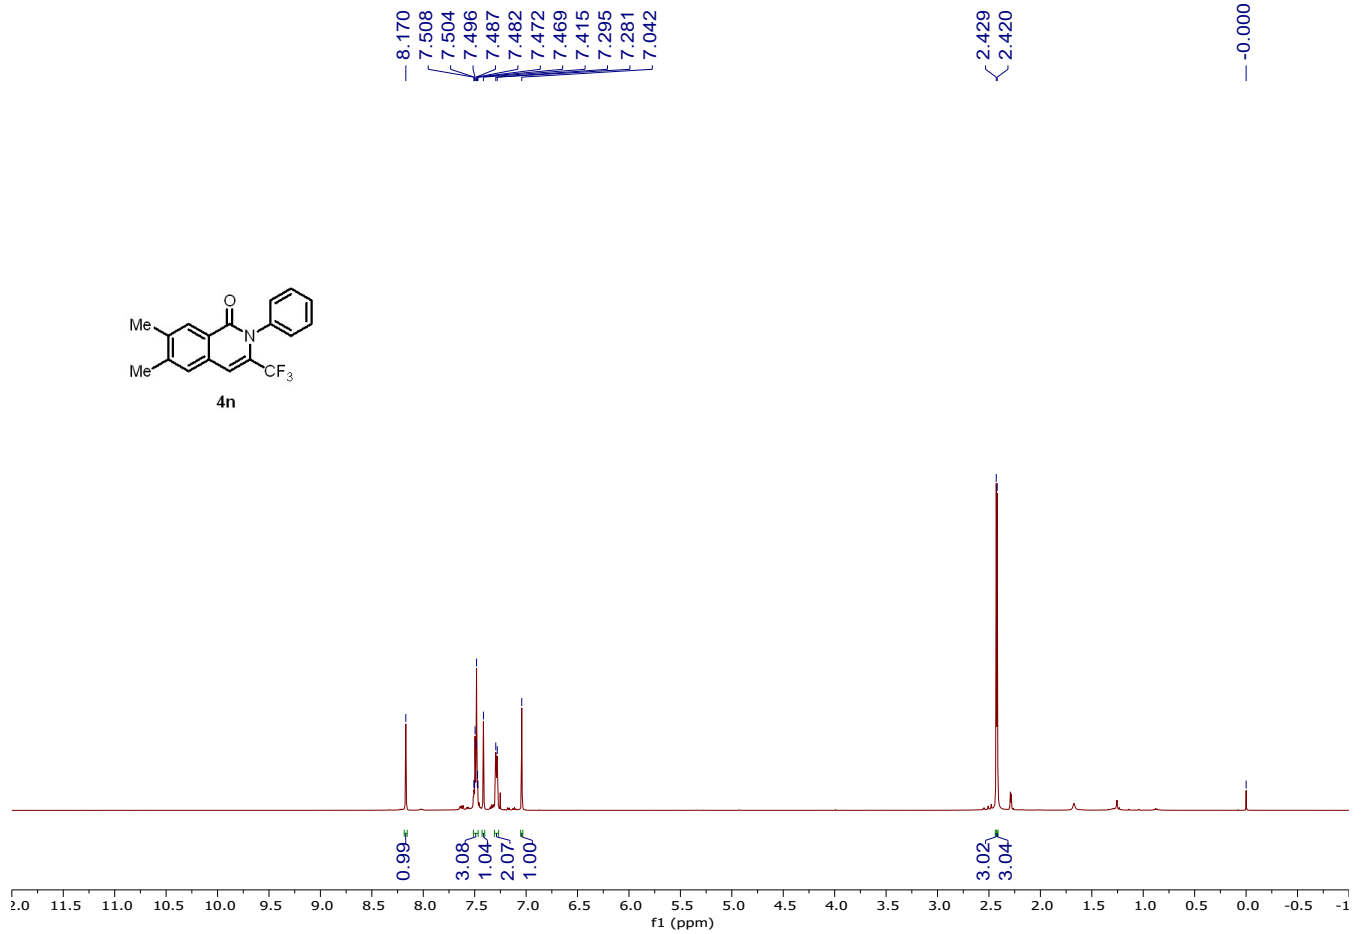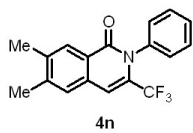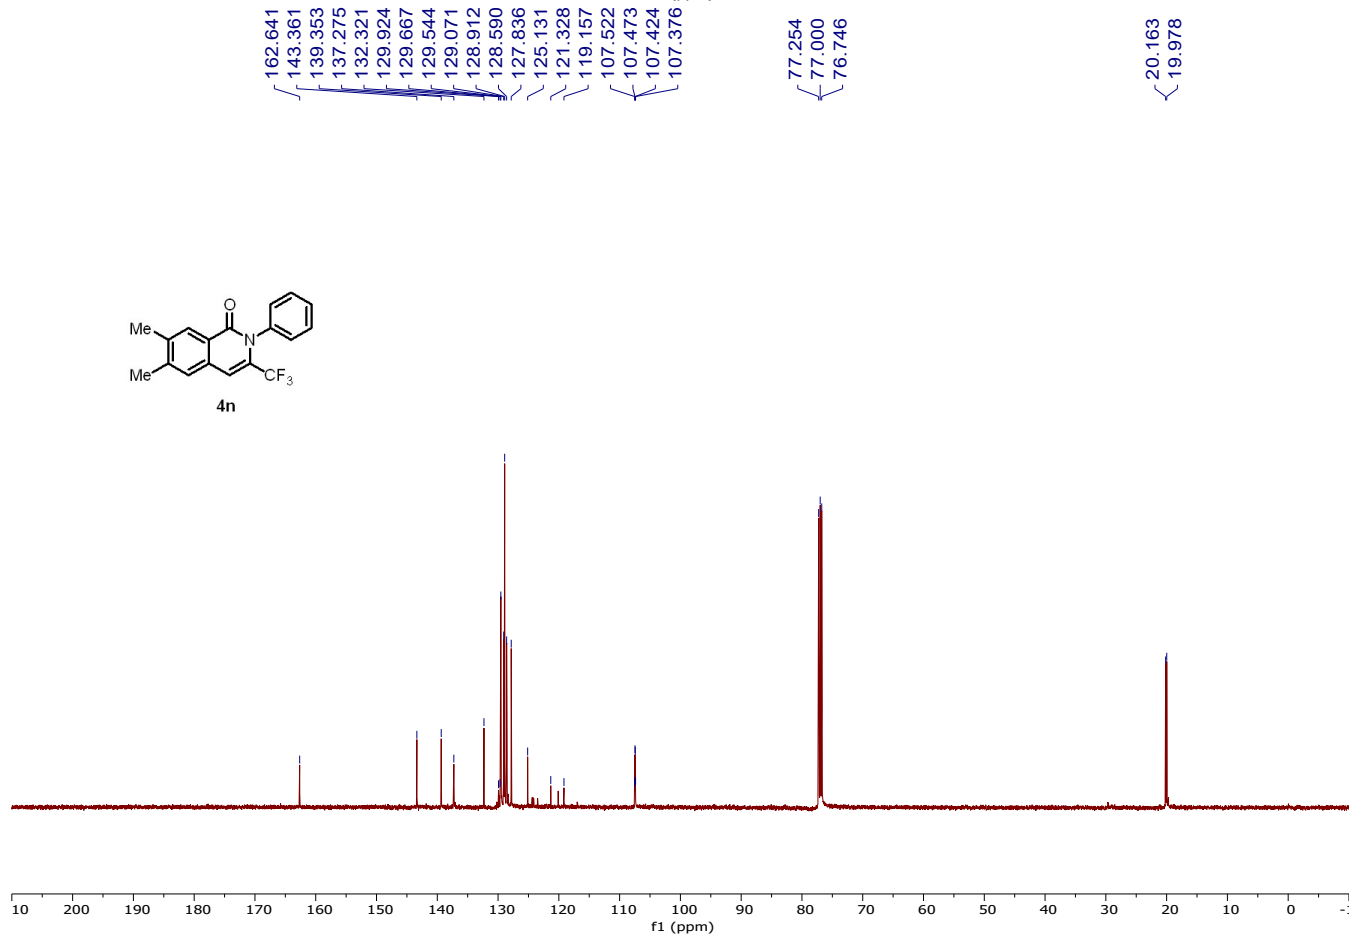

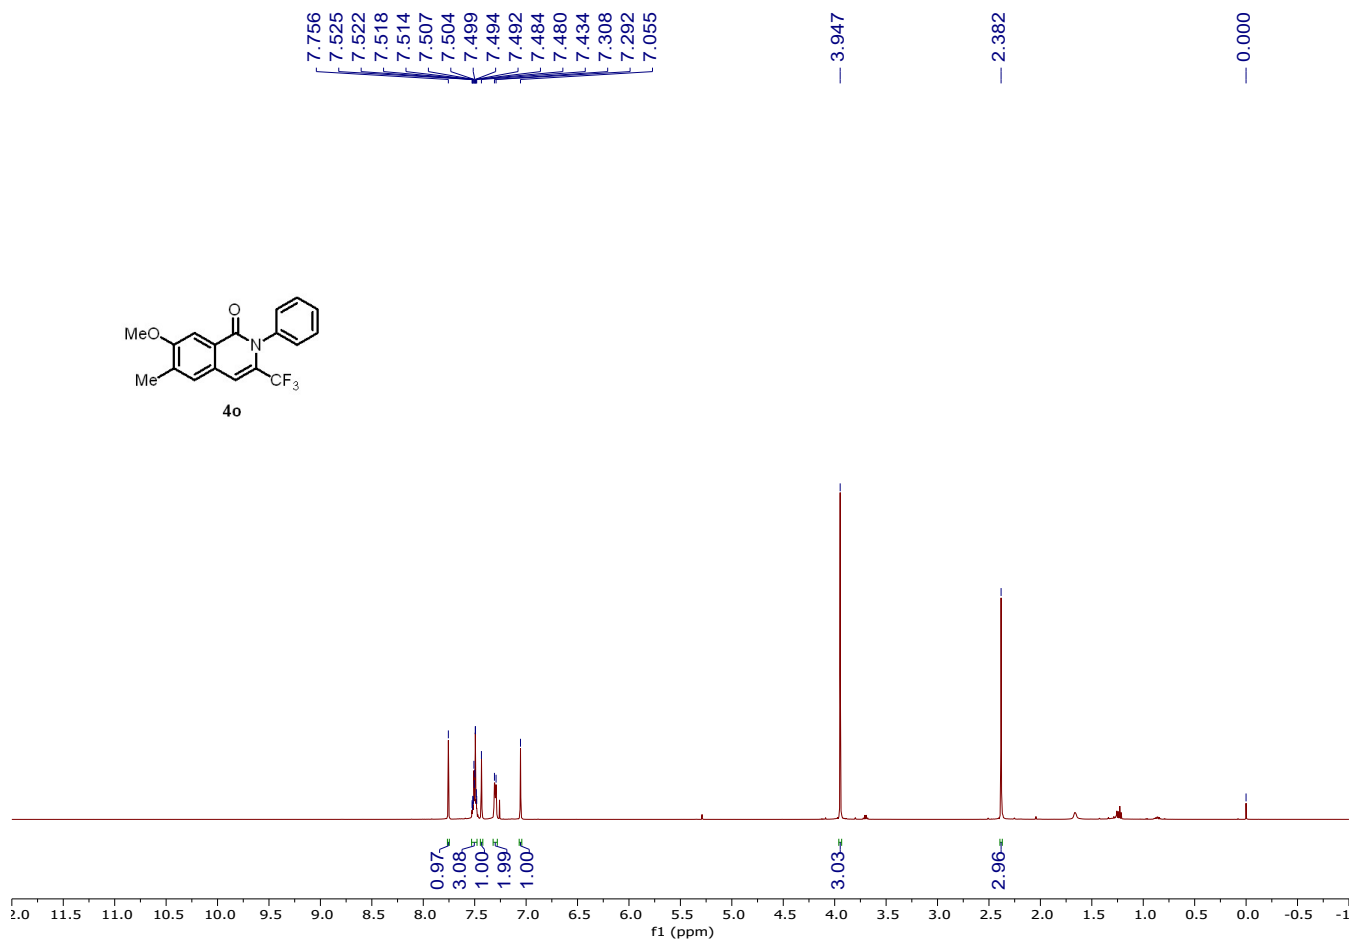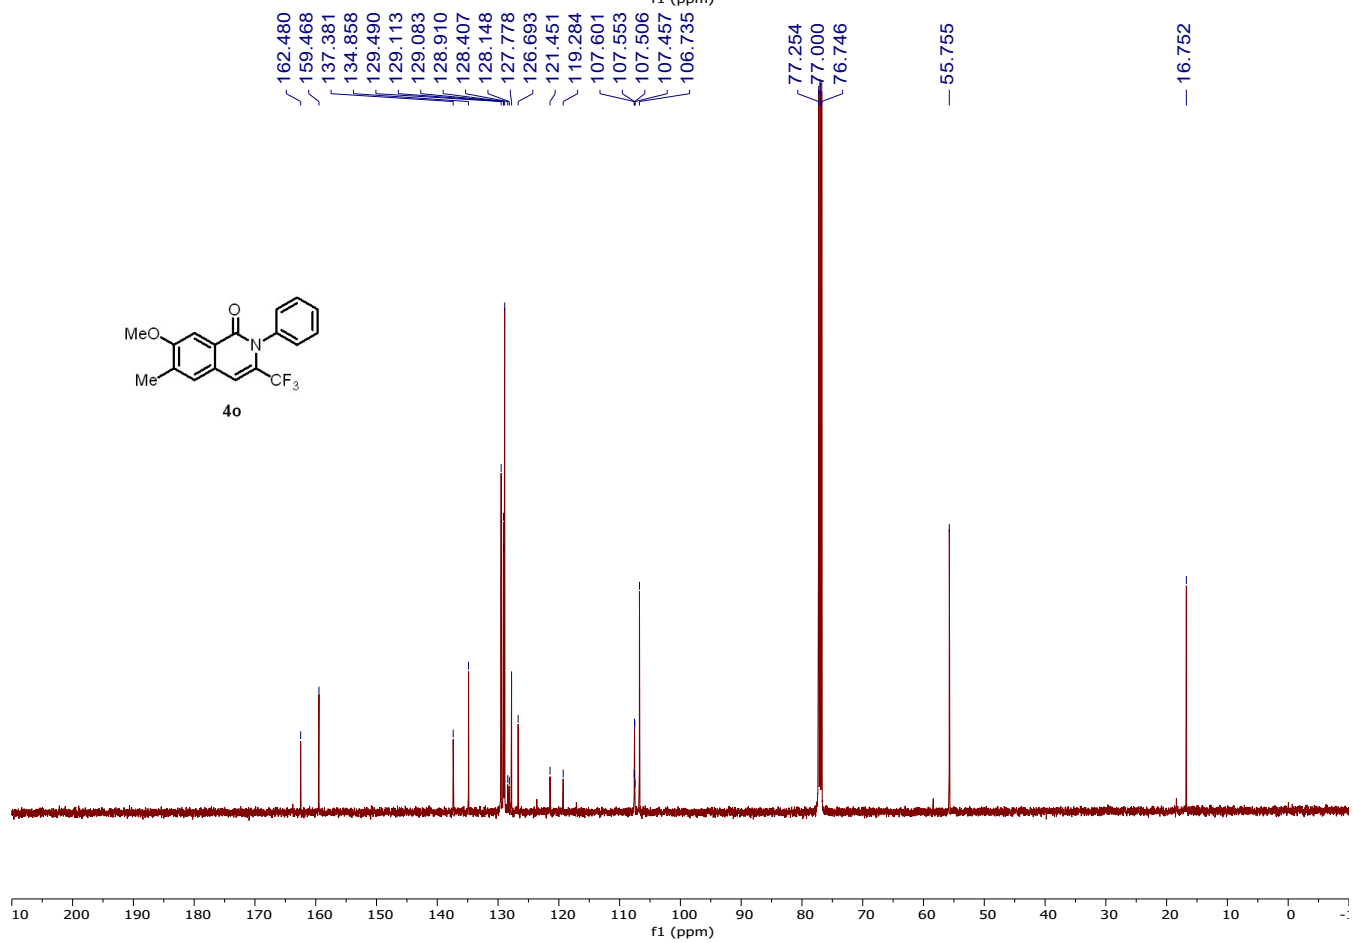

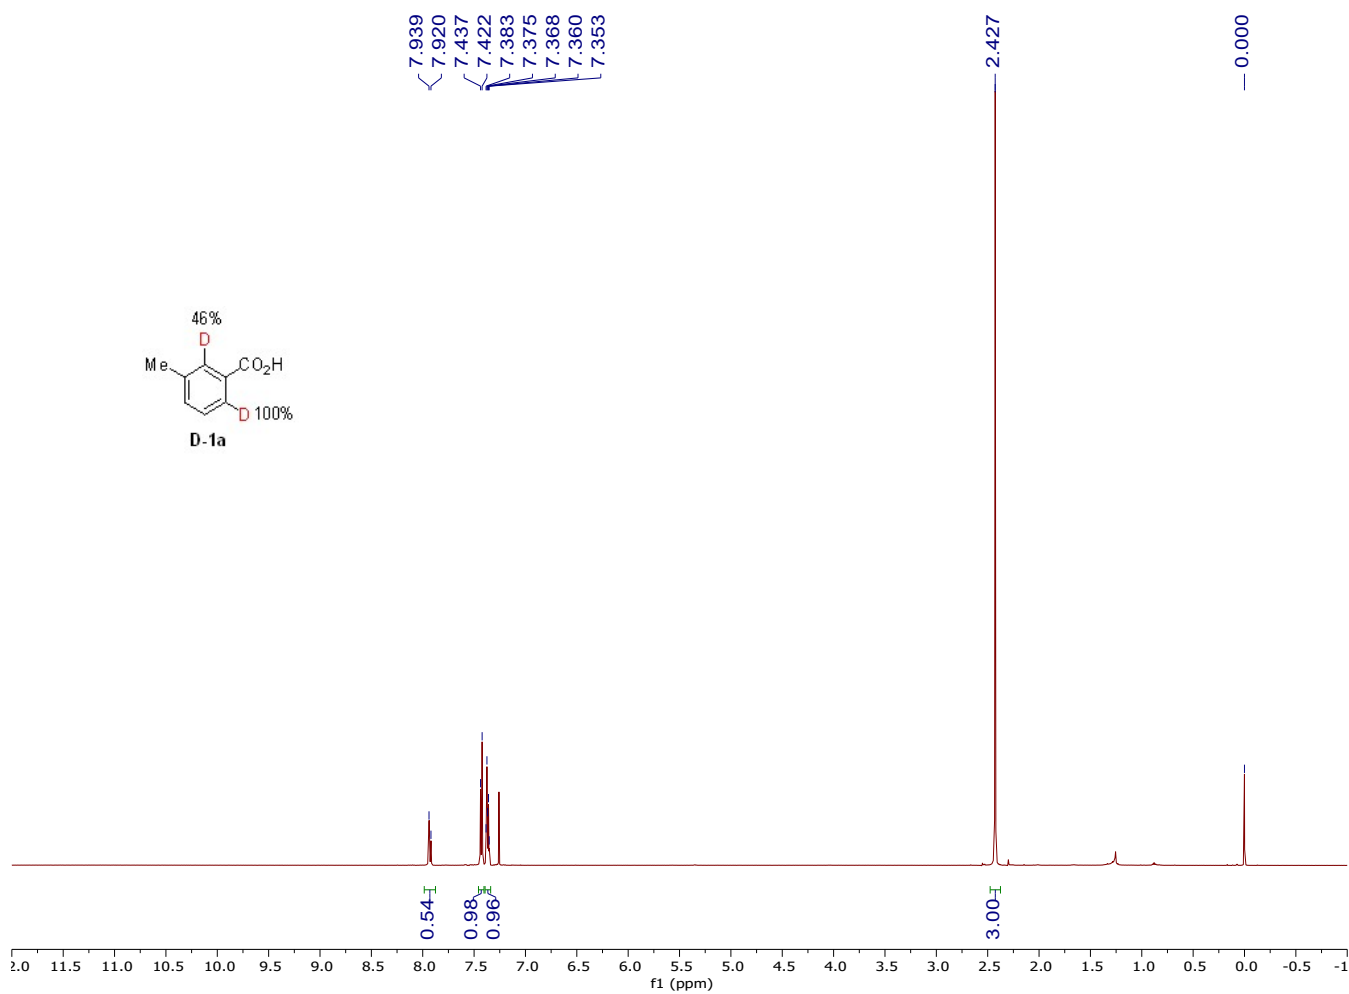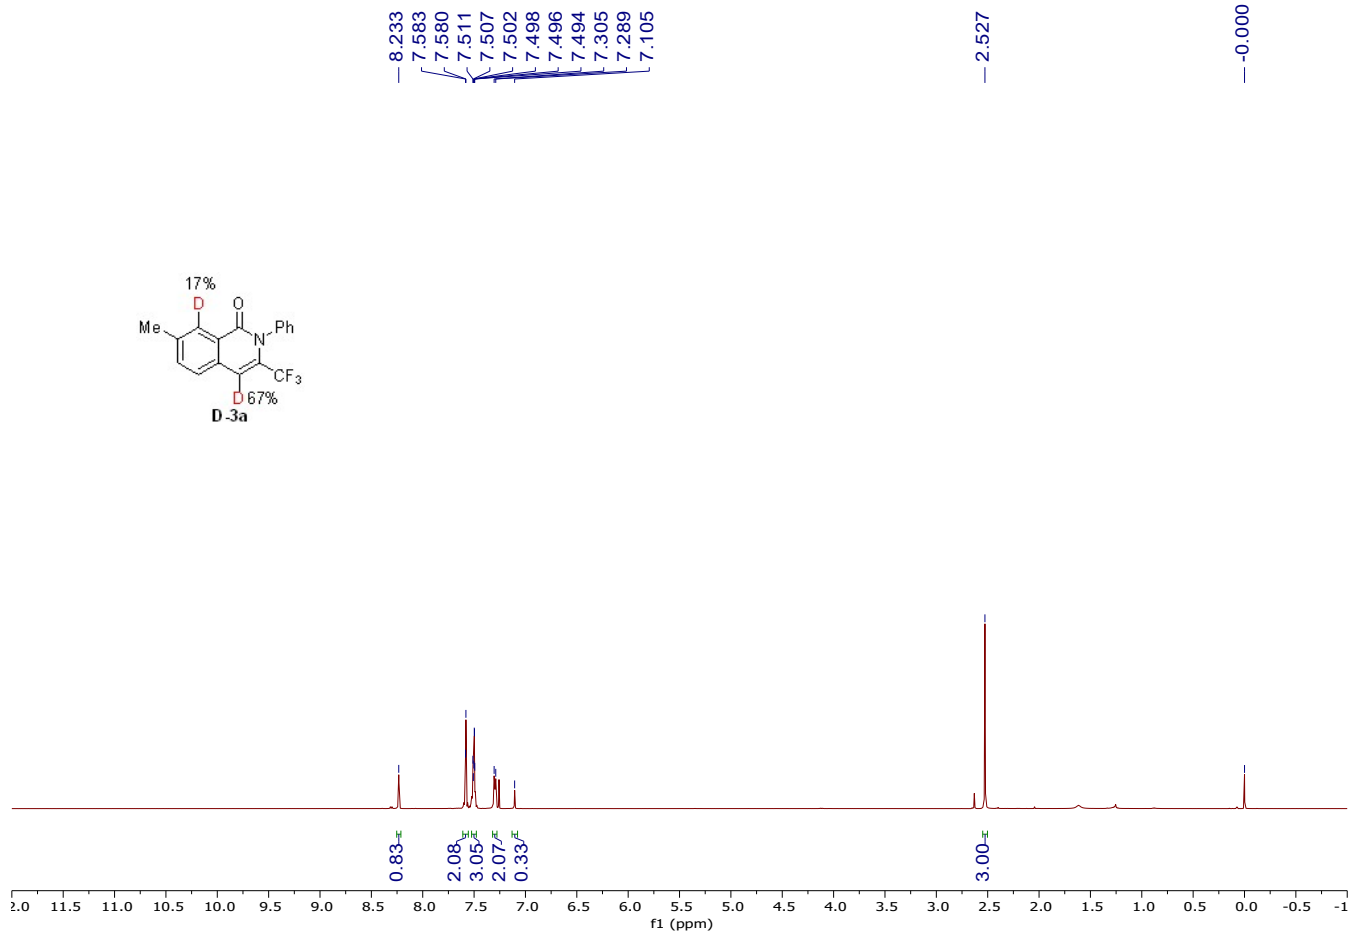

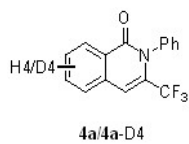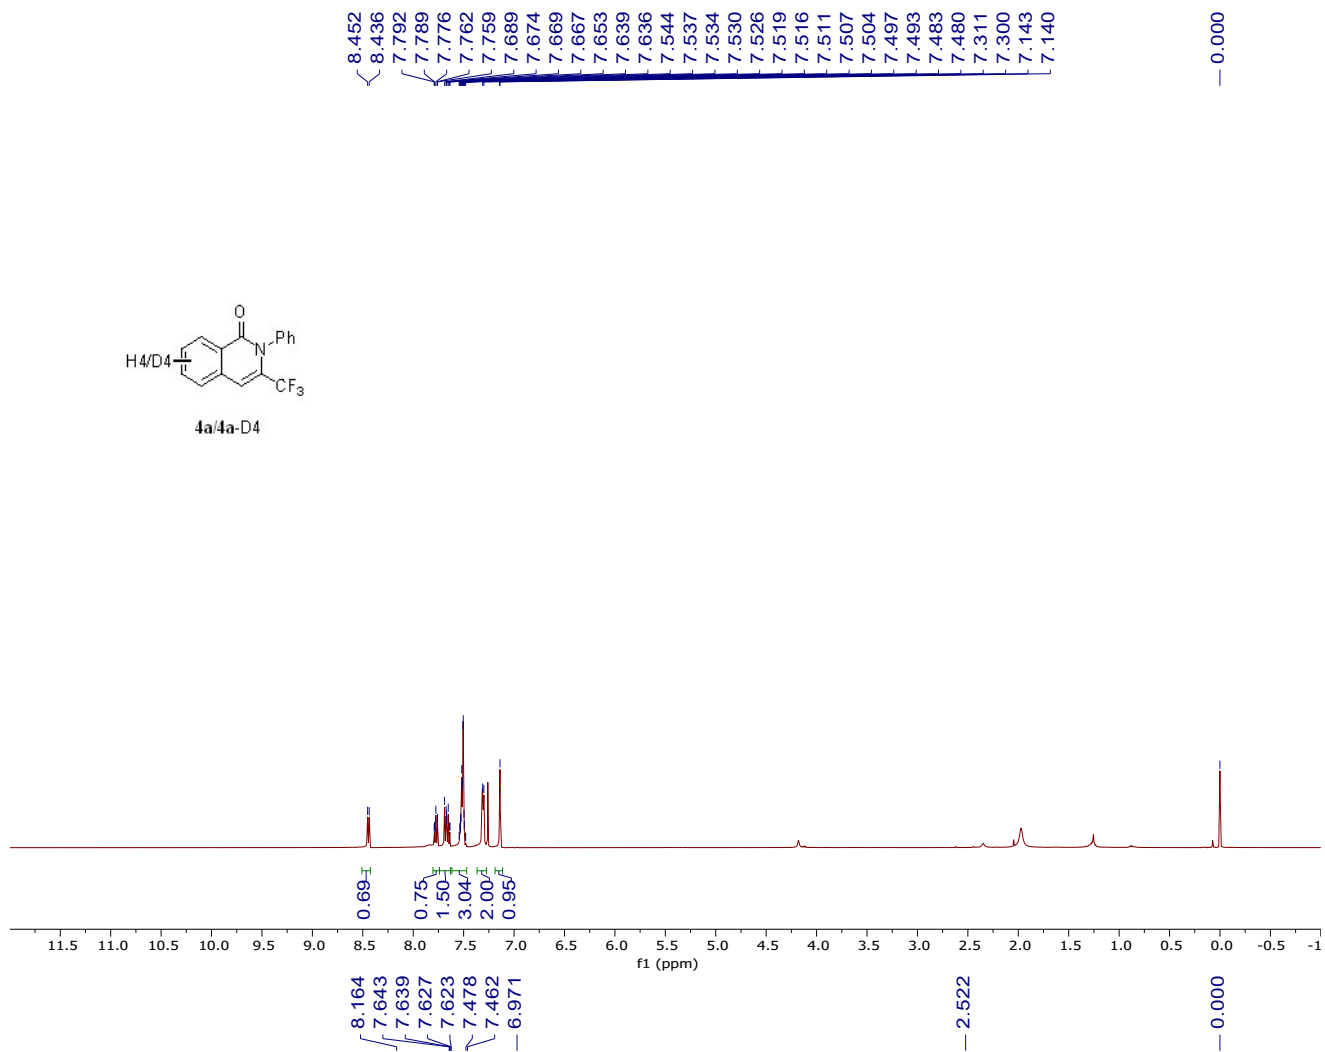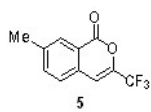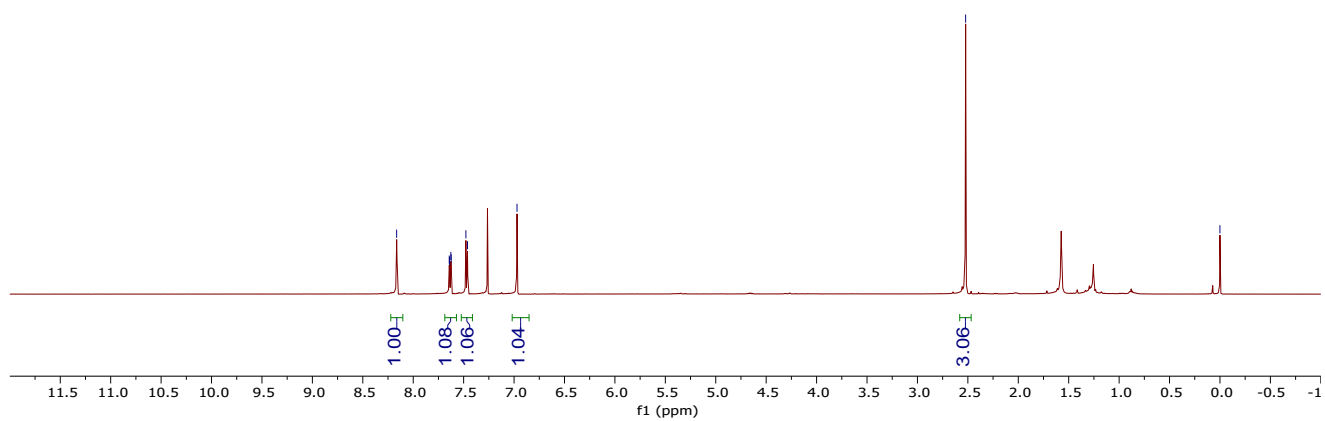

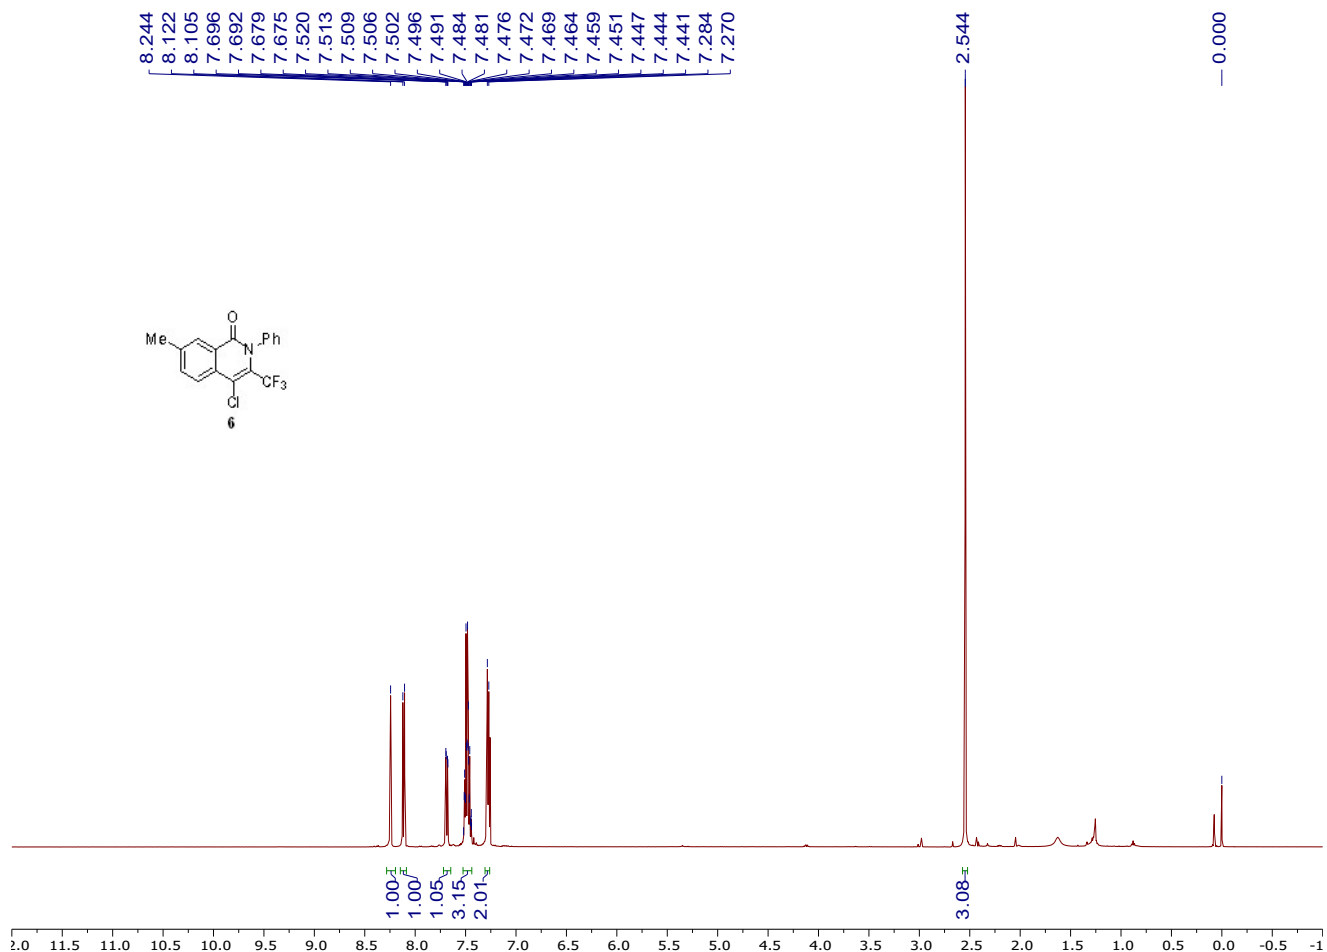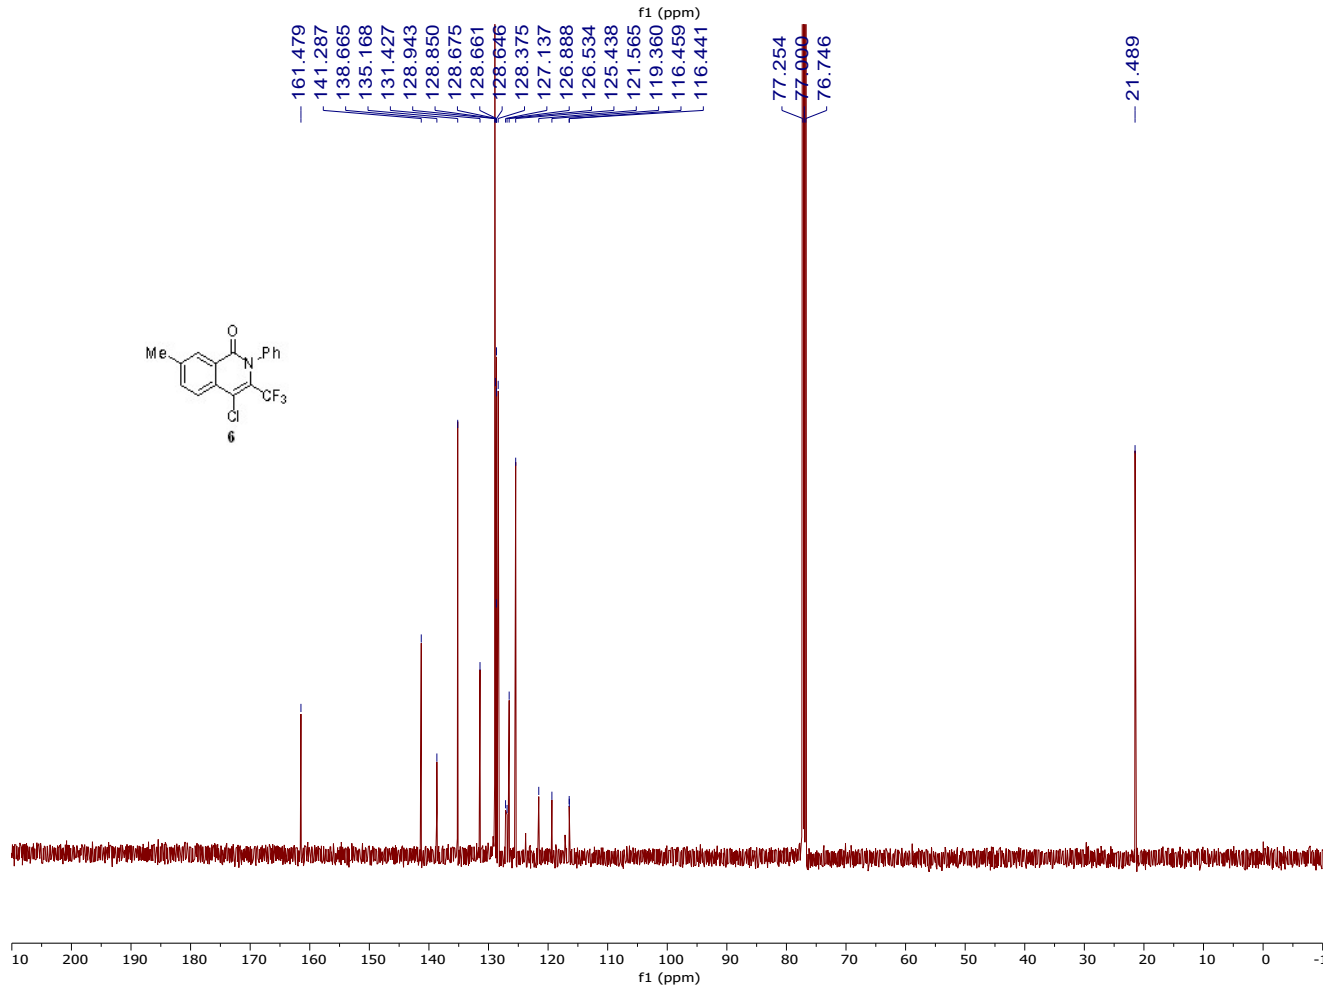

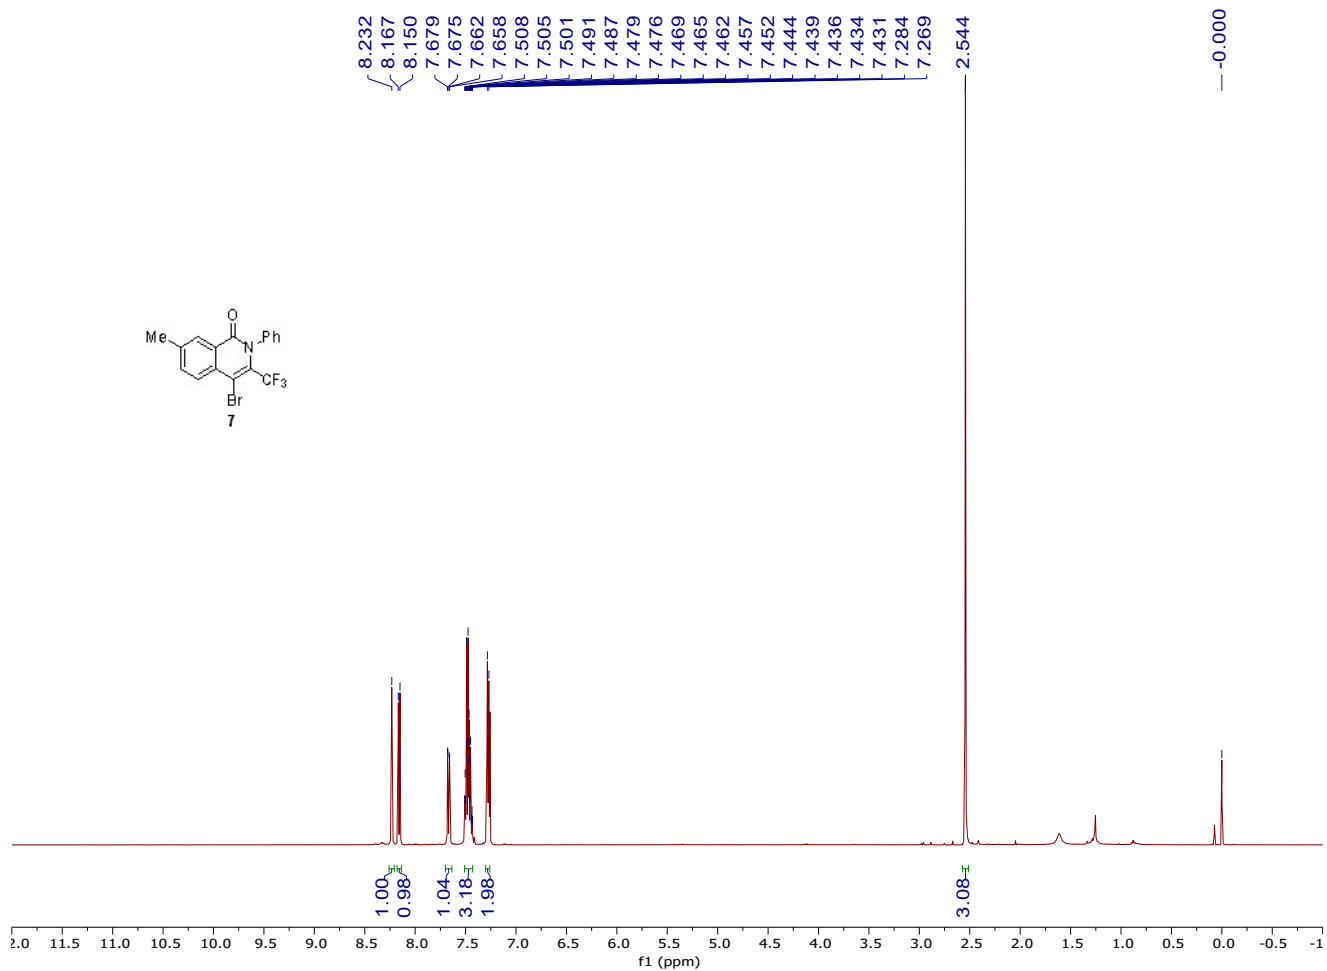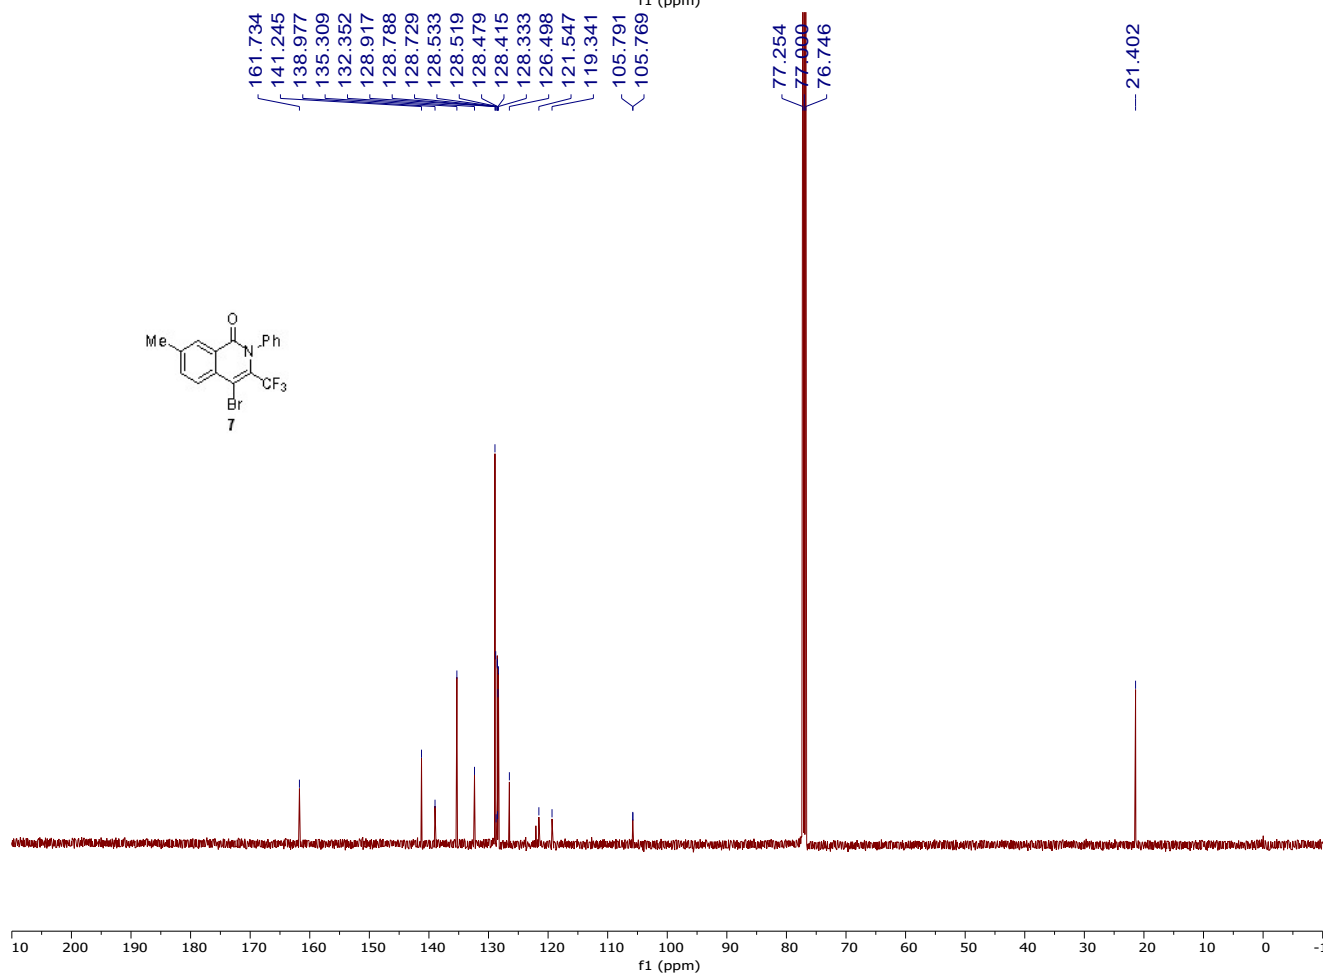

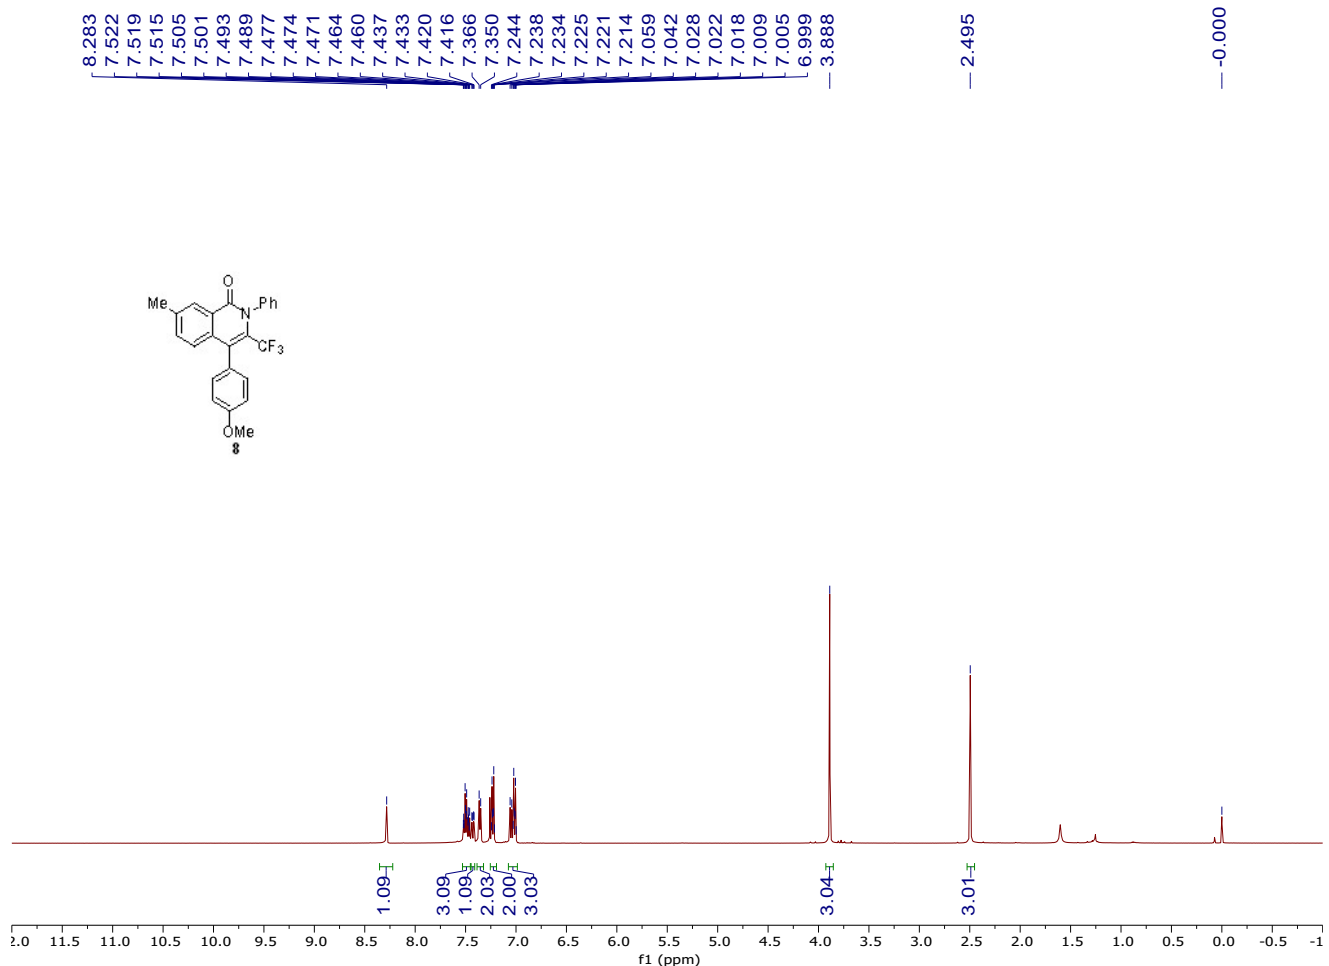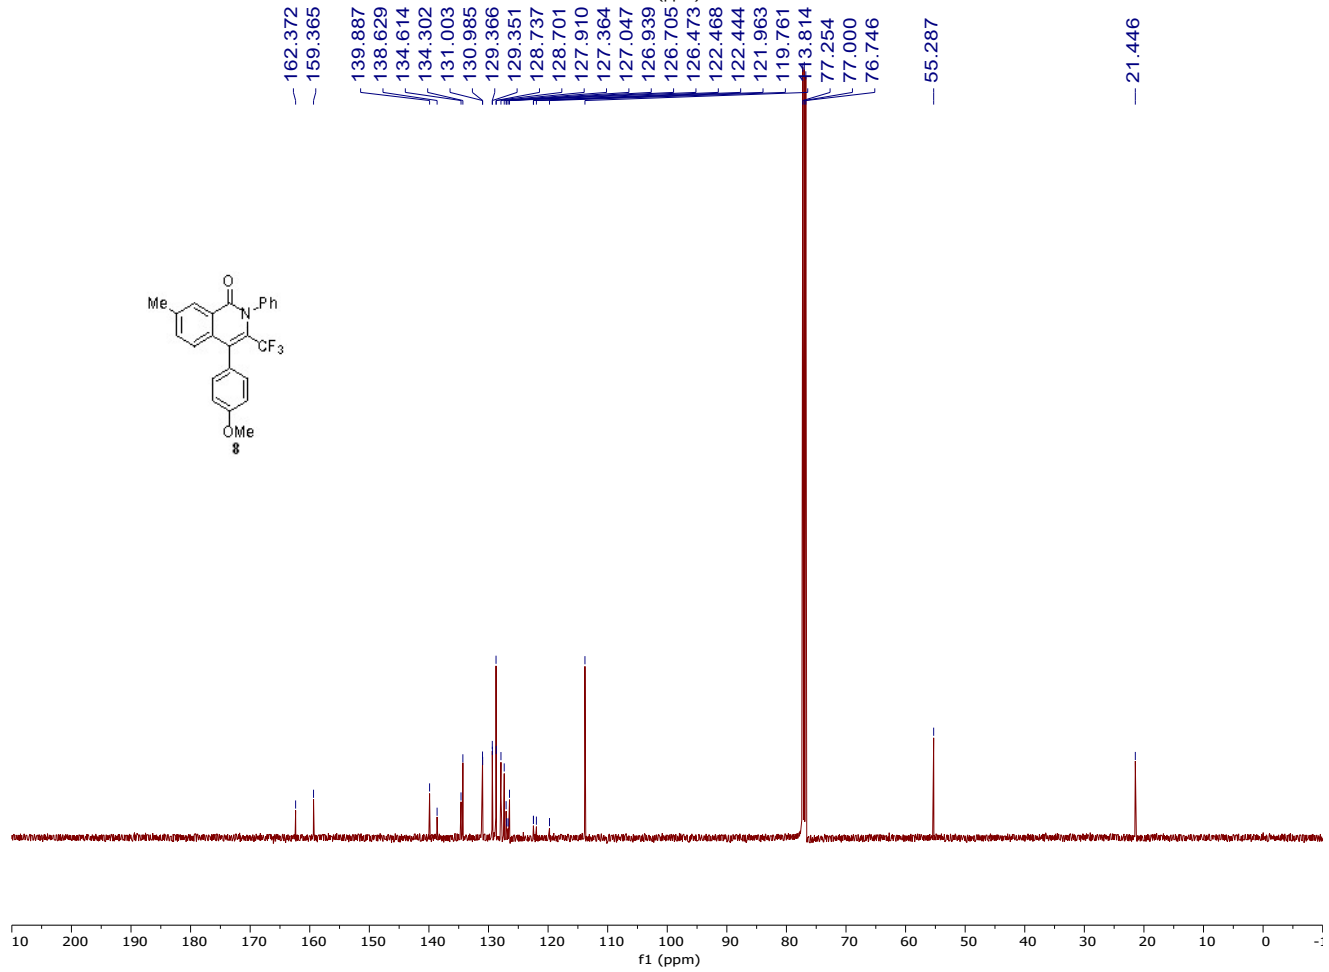

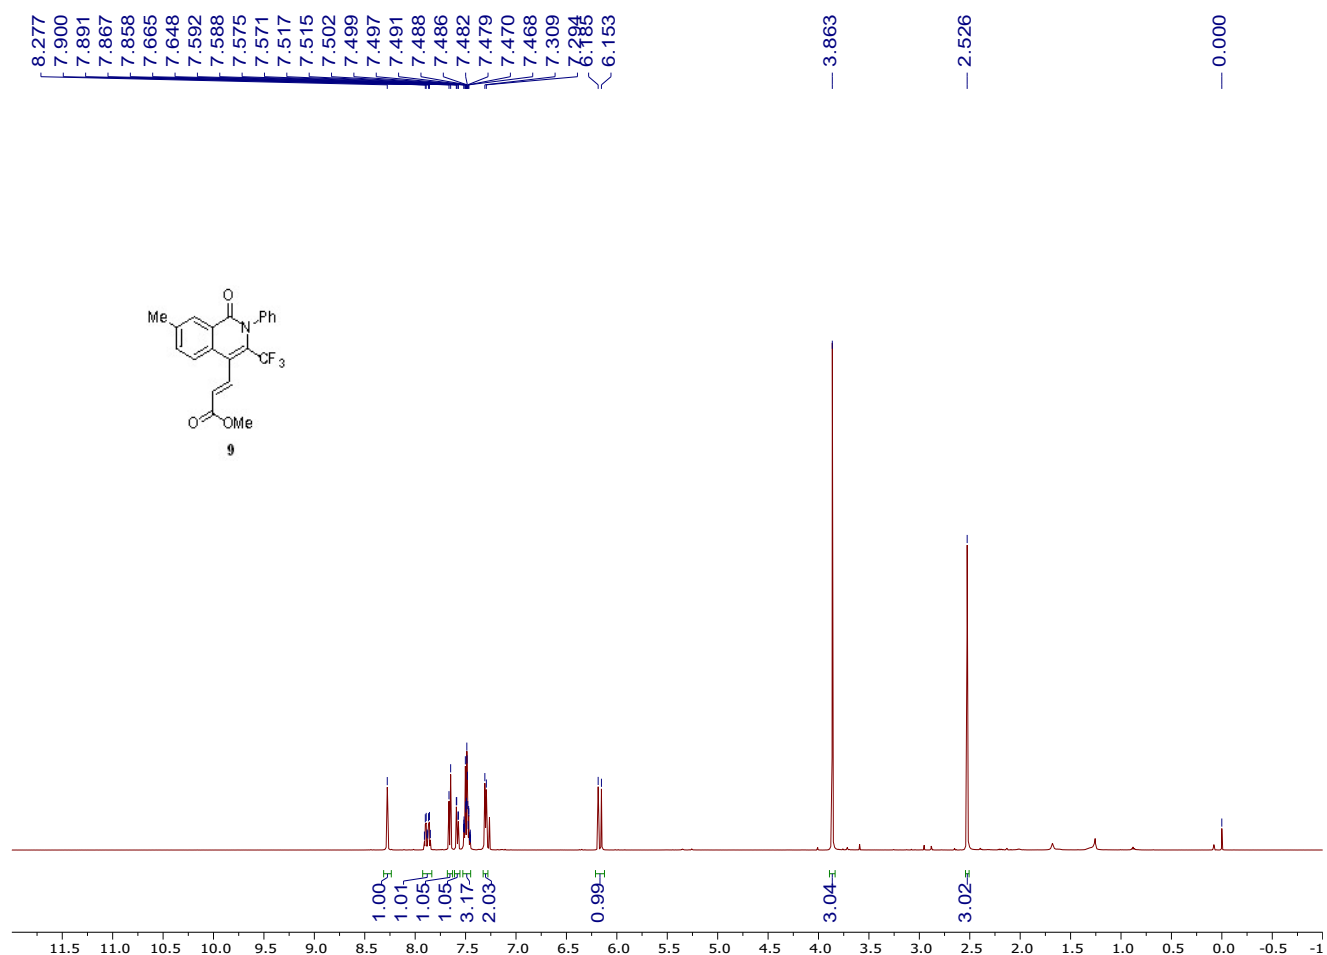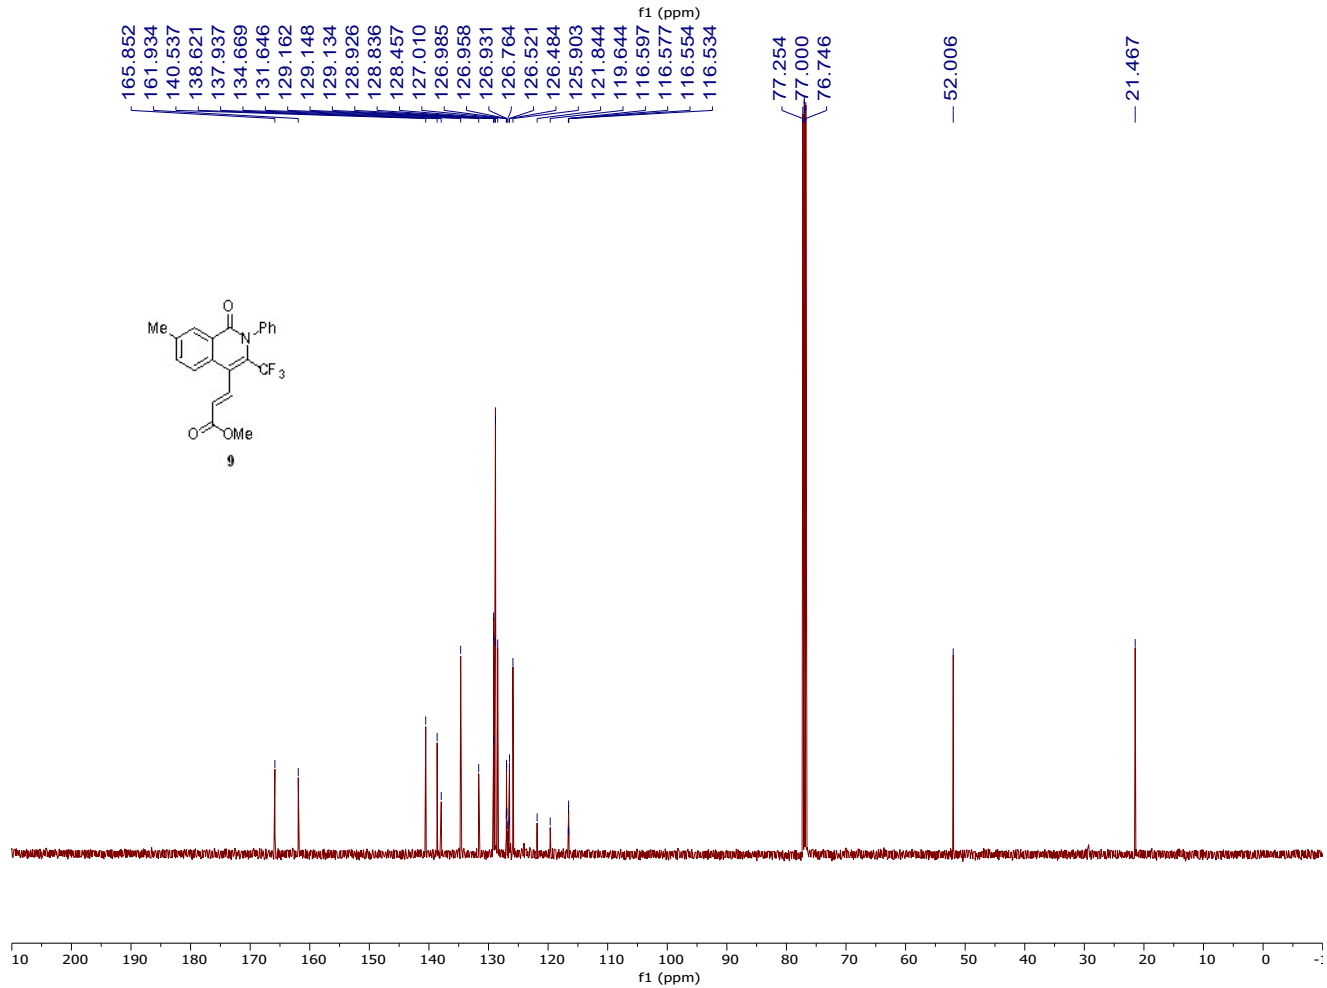

Supplement: d2qo00839d1.pdf [file d2qo00839d1.pdf]
